# Supplementary material for: Identification of Circular RNAs in Kiwifruit and Their Species-Specific Response to Bacterial Canker Pathogen Invasion
Source: Front Plant Sci. 2017 Mar 27;8:413. doi: 10.3389/fpls.2017.00413 (PMC5366334; doi:10.3389/fpls.2017.00413)
Supplement: Supplementary file 10 [file Table4.XLSX]

## Sheet: Supplementary Table 4
Supplementary Table 4 The expression profiles of circRNAs in all samples; expression values were determined by the number of back spliced reads (RPM). Each row and column represent one circRNA and one sample, respectively.
CircRNAs id/Sample name	AH-1-1	AH-2-1	AH-1-2	AH-2-2	AH-1-3	AH-2-3	AJ-1-1	AJ-2-1	AJ-1-2	AJ-2-2	AJ-1-3	AJ-2-3	Ae-1-1	Ae-2-1	Ae-1-2	Ae-2-2	Ae-1-3	Ae-2-3	Aa-1-1	Aa-2-1	Aa-1-2	Aa-2-2	Aa-1-3	Aa-2-3	AH-L-1	AH-L-2	AH-R-1	AH-R-2	AH-S-1	AH-S-2
Ac_ciRNA_00004	0	0	0.177208	0.0399141	0	0	0.201807	0	0	0	0	0	0	0	0	0	0	0	0	0	0	0	0	0	0	0	0	0	0	0
Ac_ciRNA_00008	0	0	0	0	0	0	0	0	0	0	1.04885	0	0	0	0	0	0	0	0.414466	1.00761	0.193181	0.786756	0.617068	5.68193	0	0	0	0	0	0
Ac_ciRNA_00009	0	0	0	0	0	0	0	0	0.0423501	0.0425238	0	0	0.0428117	0	0.0886281	0	0.0817877	0.042017	0	0	0	0	0	0	0	0	0	0	0	0
Ac_ciRNA_00011	0	0	0	0	0	0.0398119	0	0	0	0	0	0	0	0	0	0.044862	0	0	0	0	0	0	0	0	0	0.064001	0.118332	0.0859316	0	0
Ac_ciRNA_00017	0	0	0	0.0399141	0	0.0398119	0.0403615	0.039197	0	0	0	0.0404687	0	0	0	0	0	0	0	0	0	0	0	0	0	0	0.0788881	0	0.0566614	0
Ac_ciRNA_00025	0	0	0	0	0	0	0	0	0	0	0	0	0	0.0421334	0.0886281	0.067293	0.102235	0.168068	0	0	0	0	0	0	0	0	0.0986101	0.429658	0	0
Ac_ciRNA_00031	0	0	0	0	0	0	0	0	0	0	0	0	0	0	0	0	0.0408939	0.0630255	0	0	0	0	0	0	0	0	0	0	0	0
Ac_ciRNA_00032	0	0	0	0	0	0	0	0	0	0	0	0	0	0	0.0443141	0.044862	0	0	0	0	0	0	0	0	0	0	0	0	0	0
Ac_ciRNA_00034	0	0	0	0	0.0418137	0.0398119	0.0403615	0	0	0	0	0	0	0	0.0886281	0	0	0	0	0	0	0	0	0	0	0	0	0	0.13221	0.0628316
Ac_ciRNA_00041	0	0	0	0	0	0	0	0.117591	0.105875	0.0637858	0.0388462	0.0607031	0	0	0	0	0	0	0	0	0	0	0	0	0	0	0	0	0	0
Ac_ciRNA_00051	0	0	0	0	0	0	0	0	0	0	0	0.0404687	0.214058	0.358134	0	0	0	0	0	0.0616905	0	0	0	0.0887801	0	0	0	0	0	0
Ac_ciRNA_00057	0	0	0	0	0	0	0	0.0587955	0	0	0	0	0.0856233	0.0842667	0.0443141	0.089724	0.184022	0.126051	0	0	0	0	0	0.0443901	0.0442795	0	0	0	0	0
Ac_ciRNA_00060	0	0	0	0	0	0	0	0	0	0	0	0	0	0	0	0	0	0	0	0.041127	0	0	0	0	0.0442795	0.170669	0	0	0	0
Ac_ciRNA_00066	0	0	0.0590692	0	0	0	0.0605422	0	0	0	0	0.0404687	0.149841	0.147467	0.110785	0.044862	0.163575	0.189076	0	0	0	0	0	0	0	0	0	0	0	0
Ac_ciRNA_00074	0.0631476	0.0450988	0.0590692	0	0	0	0.0605422	0.13719	0	0.0637858	0	0.0809374	0.0856233	0.105333	0.0886281	0.089724	0.0817877	0.0630255	0	0	0	0	0	0	0.0442795	0.149336	1.06499	0.451141	0.509953	0.188495
Ac_ciRNA_00075	0	0	0	0	0	0	0	0.156788	0.148225	0.233881	0	0.182109	0	0	0	0	0	0	0	0	0	0	0	0	0	0	0	0	0	0
Ac_ciRNA_00078	0	0	0.630072	0	0	0	0	0	1.1011	0	0	0	3.21087	2.5912	0	1.8842	2.12648	0.462187	0	0	0	0	0	0	0	0	0	0	8.06481	0
Ac_ciRNA_00081	0.399935	0.992173	1.02387	1.01781	0	0	1.99789	4.68404	2.20221	0	0	2.0639	11.2595	0	0	8.34434	0	0	0	1.43945	0	0	0	0	4.45009	0	0	0	0	6.70204
Ac_ciRNA_00086	0	0	0	0	0	0	0	0	0	0	0	0	0	0	0	0	0	0	1.30557	1.13099	0.922978	1.14987	0.978797	1.62024	0	0	0	0	0	0
Ac_ciRNA_00090	0.126295	0.270593	0.137828	0	0	0	0	0	0	0	0	0	0	0	0	0	0	0	0	0	0	0	0	0	0	0	0	0	0	0
Ac_ciRNA_00093	0	0	0	0	0	0	0	0	0	0	0	0	0.428117	0	0.22157	0	0.286257	0.0840339	0	0.102818	0.0643938	0.100866	0.148947	0	0	0	0	0	0	0
Ac_ciRNA_00102	0	0.0676482	0	0	0	0	0	0	0	0	0	0	0	0	0	0	0	0	0.849656	2.26199	0	0	3.17045	0	0	0	0	0	0	0
Ac_ciRNA_00103	0.463082	0.180395	0	1.07768	0.480858	0	0	0	1.12228	1.04183	0	0	0	0.358134	0	0	0	0	0	0	0	0	0	0	0	0	0	0	0	0
Ac_ciRNA_00106	0	0	0.708831	0.518884	0.33451	0	0	0	0	2.93414	0	0	2.16199	1.58	4.47572	3.79084	4.78458	11.7017	0	0	1.80303	0	0	0	0.0442795	0	0	0	0	0
Ac_ciRNA_00112	0	0	0	0	0	0	0	0	0	0	0	0	0.0428117	0	0	0.044862	0.0408939	0	0	0	0	0	0	0	0	0.064001	0.0986101	0.0429658	0	0
Ac_ciRNA_00113	0	0	0	0	0	0	0	0.078394	0.12705	0.0850477	0.0388462	0.0404687	0	0	0	0	0	0	0	0	0	0	0	0	0	0	0	0	0	0
Ac_ciRNA_00114	2.39961	3.35986	1.59487	3.6721	3.61689	6.23056	3.63253	2.03824	2.41396	2.33881	0.971156	3.92546	3.46774	0	2.23786	2.80388	3.72134	2.89917	0	0.658032	0	0	0	0	7.74891	8.34146	4.16134	8.59316	4.66512	6.61826
Ac_ciRNA_00117	0	0	0	0	0	0.0398119	0.100904	0.039197	0	0	0	0.0607031	0.107029	0.0421334	0.0664711	0	0	0.042017	0.0621699	0.041127	0	0	0	0	0	0	0	0	0	0
Ac_ciRNA_00120	0	0	0	0	0	0	0	0	0	0	0	0	0	0	0	0	0	0	0	0.123381	0.0429292	0.0605197	0	0	0	0	0	0	0	0
Ac_ciRNA_00121	0	0	0.118138	0	0	0	0.221988	0	0.338801	0.297667	1.45673	0.607031	0	0	0	0	0	0	1.2434	1.50114	0.643938	0.948142	0.617068	1.93097	0	0	0	0	0	0
Ac_ciRNA_00128	0	0	0	0	0	0	0	0	0	0	0	0	0.0428117	0.0421334	0	0.044862	0	0	0	0	0	0	0	0	0	0	0	0	0	0
Ac_ciRNA_00130	0	0	0	0	0	0	0	0	0	0	0	0	0.235464	0.0632001	0.0886281	0	0.163575	0.147059	0	0	0	0	0	0	0	0	0	0	0	0
Ac_ciRNA_00131	0	0	0	0	0	0	0	0	0	0	0	0	0	0	0.0664711	0	0.0817877	0.042017	0	0	0	0	0	0	0	0	0	0	0	0
Ac_ciRNA_00134	0.0841968	0	0.216587	0	0.0627206	0.0398119	0	0.235182	0.550552	0.4465	0.116539	0.0607031	0.0856233	0.0421334	0.132942	0.157017	0.163575	0.231093	0.103617	0.123381	0	0	0.0851128	0.0665851	0	0	0	0	0	0
Ac_ciRNA_00140	0	0	0	0	0	0	0	0.039197	0.0423501	0	0.194231	0	0	0	0	0	0	0	0.269403	0.452397	0.515151	0	0.574511	0.443901	0	0	0	0	0	0
Ac_ciRNA_00142	0	0	0	0.279399	0	0	0	0.725145	0	0	0	0	0	0	0	0	0	0	0.207233	0.658032	0.214646	0.302599	0.340451	0	0	0	0	0	0	0
Ac_ciRNA_00143	0	0	0	0	0	0	0	0	0	0	0.31077	0	0	0.0421334	0	0	0	0	0	0	0.321969	0.181559	0	0.665851	0	0	0	0	0	0
Ac_ciRNA_00147	0	0	0	0	0	0.0398119	0	0	0	0	0	0	0	0	0	0	0	0	0	0	0	0	0	0	0	0	0.118332	0.0429658	0.0566614	0.125663
Ac_ciRNA_00148	0	0	0	0	0	0	0	0	0	0	0	0	0.492334	0.400267	0.265884	0.605637	1.14503	0.882356	0	0.329016	0	0	0	0.488291	0	0	0	0	0	0.188495
Ac_ciRNA_00151	0	0	0	0	0	0	0	0	0	0	0	0	0	0	0	0	0	0	0	0	0	0	0	0	0.0442795	0.0853346	0.0788881	0.0429658	0	0
Ac_ciRNA_00152	0	0.0450988	0	0.0997853	0	0.139342	0.100904	0	0	0	0	0	0.192652	0	0	0.22431	0.143129	0	0	0	0	0	0	0	0.177118	0.106668	0	0.214829	0	0.146607
Ac_ciRNA_00155	0	0	0	0	0	0	0	0	0	0	0	0	0	0.1264	0	0	0.0817877	0.042017	0	0	0	0	0	0	0	0	0	0	0	0
Ac_ciRNA_00156	0	0	0	0	0	0	0	0.156788	0	0	0	0.121406	2.22621	2.9704	0.753339	0.762654	0.572514	0.252102	0	0	0	0	0	0	0	0	0	0	0	0
Ac_ciRNA_00165	0	0	0	0	0	0	0	0	0	0	0	0	0	0	0	0	0	0	0	0	0	0	0	0	0	0.0426673	0.039444	0.0429658	0	0
Ac_ciRNA_00166	0	0	0	0	0	0	0.080723	0	0	0	0	0	0	0	0	0	0	0	0	0	0	0	0	0	0	0.0853346	0.059166	0.0429658	0.0377743	0
Ac_ciRNA_00167	0	0.0450988	0	0	0.0627206	0.0597178	0.0605422	0	0	0	0	0	0	0	0	0	0	0	0	0	0	0	0	0	0	0	0.039444	0.257795	0.0755486	0.188495
Ac_ciRNA_00168	0	0	0	0	0	0	0	0	0	0	0	0	0.0642175	0.0842667	0	0.044862	0.0408939	0.0630255	0	0	0	0	0	0	0	0	0	0	0	0
Ac_ciRNA_00177	0	0.0450988	0.0393795	0.0399141	0.0418137	0	0	0	0	0	0	0	0	0	0	0	0	0	0	0	0	0	0	0	0	0	0	0.0859316	0.0377743	0.125663
Ac_ciRNA_00178	0.0420984	0.0676482	0.0393795	0.0399141	0.104534	0.0796238	0.121084	0	0	0	0	0.0607031	0.0428117	0	0.0443141	0	0	0	0	0	0	0	0	0	0.154978	0.106668	0.335274	0.128897	0.207759	0.607372
Ac_ciRNA_00181	0	0	0.0393795	0	0	0	0	0.0979925	0.0423501	0	0	0	0	0	0	0	0	0	0	0	0	0	0	0	0	0	0.059166	0.0644487	0	0
Ac_ciRNA_00182	0	0.0450988	0	0	0	0	0	0	0	0	0	0.0607031	0.0428117	0.0421334	0.0443141	0	0	0	0	0	0	0	0	0	0	0	0	0	0.0377743	0
Ac_ciRNA_00184	0	0.0901976	0.137828	0.119742	0.0627206	0.119436	0.28253	0.0587955	0.12705	0.10631	0	0.182109	0.149841	0.147467	0.199413	0.112155	0.224916	0.168068	0	0	0	0	0	0	0.154978	0.213337	0.354996	0.0429658	0.245533	0.335102
Ac_ciRNA_00186	0.126295	0.202945	0.255967	0.359227	0.271789	0.477743	0.605422	0.274379	0.254101	0.212619	0.330193	0.445156	0.51374	0.4424	0.753339	0.538344	0.511173	0.546221	0.0621699	0.0616905	0.0429292	0.0403465	0.0425564	0.0443901	0.442795	1.32269	1.59748	1.26749	0.944357	3.16253
Ac_ciRNA_00189	0.0841968	0	0	0.0399141	0.0418137	0	0.0605422	0	0	0	0	0	0	0	0	0	0	0	0.0414466	0.041127	0	0.080693	0	0.0665851	0	0	0	0	0	0.0628316
Ac_ciRNA_00190	0	0	0.0393795	0.0798283	0	0.0796238	0.080723	0	0	0	0	0	0	0	0	0	0	0	0	0	0	0	0	0	0	0.0426673	0	0	0	0
Ac_ciRNA_00193	0	0	0	0	0	0	0	0	0	0	0	0	0	0	0	0	0	0	0	0	0	0	0	0	0.0442795	0.064001	0	0	0	0
Ac_ciRNA_00195	0	0	0	103.278	36.2734	159.447	52.7323	78.3156	87.3048	90.2143	24.7839	0	15.8189	16.8323	14.3134	15.0961	22.4916	14.6639	8.33077	5.12031	0	9.66298	8.63895	0	114.44	203.95	50.9025	72.9774	78.1172	105.892
Ac_ciRNA_00196	0	0	0	0	0	0	0	0.117591	0	0	0	0	0	0	0	0	0	0	0	0	0	0	0	0	0.0664193	0.0853346	0	0	0	0
Ac_ciRNA_00197	0	0	0	0	6.31388	14.5114	5.26718	0	0	7.42041	0	0	0	0	0	0	0	0	0	0	0	0	0	0	0	0	0	0	0	21.1952
Ac_ciRNA_00204	0	0	0.078759	0	0	0.418025	0	0	0	0	0	0	0	0	0	0	0	0	0	0	0	0	0	0	0.309957	0.384006	0.276108	0.66597	0	0.795867
Ac_ciRNA_00206	0	0	0	0	0	0	0	0	0	0	0	0	0	0	0	0	0	0	0	0	0	0	0	0	0.0664193	0.0853346	0	0	0	0.397934
Ac_ciRNA_00207	0	0	0	0	0	0	0	0	0	0	0	0	0	0	0	0	0	0	0	0	0	0	0	0	0	0	0.138054	0.171863	0	0
Ac_ciRNA_00214	0	0	0	0	0.0627206	0.258777	0	0	0	0	0	0	0	0	0	0	0	0	0	0	0	0	0	0	0	0	0	0	0	0.167551
Ac_ciRNA_00216	0	0	0	0	0	0	0	0	0	0	0	0	0	0	0	0	0	0	0	0	0	0	0	0	0.0664193	0.0426673	0	0	0	0
Ac_ciRNA_00228	0	0	0	0	0	0	0	0	0	0	0	0	0	0	0	0	0	0	0	0	0	0	0	0	0.0442795	0.0426673	0	0.0429658	0	0.0418878
Ac_ciRNA_00230	0	0	0	0.598712	0	0.836049	0	0	0	0	0.757502	0.505859	1.54122	0	0	0	0	0	0	0	0	0	0	1.19853	0	0	0	0	0	0
Ac_ciRNA_00231	0	0	0	0	0	0	0	0	0	0	0	0	0	0	0.288041	0	0.306704	0.42017	0	0	0	0	0	0	0	0	0	0	0	0
Ac_ciRNA_00233	0	0	0	0	0	0	0	0.293978	0	0.807953	0	0.303515	1.04889	0.969068	0.731182	0.964533	0.961006	0.735297	0	0	0	0	0	0	0	0	0	0	0	0
Ac_ciRNA_00236	0.715673	0	0.945108	0	0	0	0	0.587955	0	1.25445	0.407886	0	0	1.74853	1.68393	3.00576	2.14693	2.9622	0	0	0	0.322772	0.255338	0	0.509214	0	0	0	0.321081	0
Ac_ciRNA_00237	0	0	0	0	0	0	0	0.411569	0	0	0.543847	0	0	0	0.686868	1.23371	0.695196	0.987399	0.227956	0.822541	0.257575	0.403465	0.46812	0.554876	0	0	0	0	0	0
Ac_ciRNA_00238	0.315738	0.856877	0.649762	1.07768	0.501765	1.29389	0.847591	0.881933	0.868178	0	0.660386	0	0	2.4016	0	0	1.84022	0	0	0	0	0	0	0	0	0	0	3.30837	0	0
Ac_ciRNA_00247	0	0.0901976	0.0393795	0.0399141	0.0418137	0.0398119	0.0605422	0.274379	0.0423501	0.10631	0	0.0404687	0	0.0421334	0	0.044862	0	0.042017	0	0	0	0	0	0	0.132839	0.0426673	0.118332	0.107414	0.0566614	0
Ac_ciRNA_00248	0	0	0	0	0	0	0.0605422	0	0	0	0	0	0	0	0	0	0	0	0	0	0	0	0	0	0.0442795	0.0426673	0.0788881	0.0859316	0.0377743	0
Ac_ciRNA_00255	0	0	0	0	0	0	0	0	0	0	0	0	0.0856233	0.0842667	0.0664711	0	0.224916	0.189076	0	0	0	0	0	0	0	0	0	0	0	0
Ac_ciRNA_00256	0	0	0	0	0	0	0	0	0	0	0	0	0.0428117	0	0	0	0.0817877	0.126051	0	0	0	0	0	0	0	0	0	0	0	0
Ac_ciRNA_00258	1.17875	0.992173	0	0.558798	0.229976	0.398119	0	0	0	0	0	0.0607031	0	0	0	0	0	0	0	0	0	0	0	0	3.25454	2.26137	0	3.54468	0	3.03686
Ac_ciRNA_00260	0	0.0450988	0	0	0	0	0	0.0587955	0.0635252	0	0	0	0	0	0	0	0	0	0	0	0	0	0	0	0	0	0	0.0429658	0.0377743	0.0837755
Ac_ciRNA_00264	5.53594	6.90011	0	5.30858	2.71789	6.96708	6.76055	0	0	6.22974	1.02943	5.38234	0	0.842667	1.70609	0	2.10603	0	0.476636	0.514088	0.515151	0.544678	0	0	0	0	0	0	7.64929	13.6345
Ac_ciRNA_00269	0	0.0901976	0	0	0.0836275	0	0	0	0.105875	0.0637858	0	0.202344	0	0	0	0	0	0	0	0	0	0	0	0	0	0.192003	0	0.279278	0.169984	0.146607
Ac_ciRNA_00270	0	0	0	0	0	0	0	0	0.0423501	0.0425238	0	0.0404687	0	0	0	0	0	0	0	0	0	0	0	0	0	0	0	0	0	0
Ac_ciRNA_00271	0	0	0	0	0	0	0	0.117591	0.0635252	0.0637858	0	0.0607031	0	0	0	0	0	0	0	0	0	0	0	0	0	0	0	0	0	0
Ac_ciRNA_00280	0.0631476	0.0450988	0.0393795	0	0	0.0597178	0.181627	0	0	0.0637858	0	0.101172	0	0	0	0	0.0408939	0	0	0	0	0	0	0	0.088559	0.149336	0.0986101	0.0644487	0	0.0418878
Ac_ciRNA_00281	0.105246	0.0676482	0	0	0	0.0398119	0	0	0.0423501	0	0	0.0404687	0	0	0	0	0	0	0	0	0	0	0	0	0.154978	0.064001	0.335274	0.193346	0.321081	0.314158
Ac_ciRNA_00285	0	0	0	0	0	0	0	0	0	0	0	0	0.128435	0.210667	0.0664711	0.067293	0	0.105042	0	0	0	0	0	0	0	0	0	0.0429658	0	0
Ac_ciRNA_00286	0	0	0	0	0	0	0	0.078394	0.0847003	0.0637858	0	0.101172	0.171247	0	0	0.067293	0.0613408	0.0630255	0	0	0	0	0	0	0	0	0.039444	0	0	0
Ac_ciRNA_00292	0	0.0450988	0	0.0399141	0	0	0.080723	0.0587955	0.0635252	0.0637858	0.0388462	0	0	0.0632001	0.0664711	0	0	0	0.0828932	0	0	0	0	0	0.0664193	0.0426673	0.138054	0.300761	0.0566614	0.230383
Ac_ciRNA_00299	0	0	0	0	0	0	0	0.235182	0.169401	0.148833	0.0388462	0.202344	0	0	0	0	0	0	0	0	0	0	0	0	0	0	0	0	0	0
Ac_ciRNA_00301	0	0	0	0	0	0	0	0	0	0	0.563271	0	0	0	0	0	0	0	0.12434	0.205635	0.214646	0.0605197	0.127669	0.22195	0	0	0	0	0	0
Ac_ciRNA_00308	0	0	0	0	0	0	0	0.039197	0.0847003	0.0637858	0	0.14164	0	0	0	0	0	0	0	0	0	0	0	0	0	0	0	0	0	0
Ac_ciRNA_00317	0	0	0	0	0	0	0	0	0.0423501	0.0637858	0	0	0	0	0	0	0	0	0	0	0	0	0	0	0	0	0.138054	0	0	0
Ac_ciRNA_00327	0	0	0	0.0997853	0	0	0.0605422	0.0587955	0.0847003	0.0637858	0.0388462	0.0809374	0	0	0	0	0	0	0	0	0	0	0	0	0.199258	0.128002	0	0.128897	0	0
Ac_ciRNA_00336	0	0	0	0	0	0	0	0	0	0	0	0	0	0	0	0	0	0	0	0	0	0	0	0	0	0	0.059166	0.0429658	0.0377743	0
Ac_ciRNA_00340	0.0631476	0.0901976	0.0590692	0	0	0.398119	0.080723	0	0	0.0850477	0	0	0	0	0	0	0	0	0	0	0	0	0	0	0	0.128002	0.453606	0.257795	0.169984	0.0418878
Ac_ciRNA_00343	0	0	0	0	0	0	0	0	0	0	0	0	0	0	0	0	0	0	0	0	0	0	0	0	0	0	0.059166	0.0859316	0.0566614	0.0628316
Ac_ciRNA_00346	0	0	0.0393795	0.0399141	0	0	0	0	0	0	0	0	0	0	0	0	0	0	0	0	0	0	0	0	0	0	0	0	0	0
Ac_ciRNA_00348	0	0	0	0	0.0418137	0.0398119	0	0	0	0.0637858	0	0.0607031	0	0	0	0	0	0	0	0	0	0	0	0	0.0664193	0	0	0	0	0.104719
Ac_ciRNA_00350	0.0420984	0	0.0393795	0.0598712	0.0627206	0.0796238	0.403615	0.293978	0.254101	0.531548	0.0971156	0.303515	0.235464	0.1264	0.110785	0.112155	0.102235	0.168068	0	0	0	0	0	0	0	0	0	0	0.0566614	0.0418878
Ac_ciRNA_00354	0.315738	0.157846	0	0.0798283	0.104534	0.159248	0	0	0	0	0	0	0	0	0	0	0	0	0	0	0	0	0	0	0.354236	0.192003	0	0.708936	0	1.54985
Ac_ciRNA_00371	0	0	0	0	0	0.0398119	0	0	0.0423501	0	0	0	0	0	0	0	0	0	0	0	0	0	0	0	0	0	0.059166	0.0644487	0	0
Ac_ciRNA_00378	0	0	0	0	0	0	0	0	0	0	0	0	0.0642175	0.0421334	0	0	0	0.042017	0	0	0	0	0	0	0	0	0	0	0	0
Ac_ciRNA_00379	0	0	0	0	0	0	0	0	0	0	0	0	0.0856233	0	0.0443141	0.044862	0	0.042017	0	0	0	0	0	0	0	0	0	0	0	0
Ac_ciRNA_00380	0.0631476	0.0450988	0	0.0598712	0	0.0398119	0	0	0.0423501	0.0850477	0	0	0	0	0.0664711	0	0	0.0840339	0	0	0	0	0	0	0	0	0.039444	0.107414	0	0
Ac_ciRNA_00381	0	0	0	0.0399141	0	0	0.0403615	0	0	0	0	0	0.235464	0.1264	0.22157	0.201879	0.102235	0.105042	0	0	0	0	0	0	0	0	0	0	0	0
Ac_ciRNA_00382	0	0	0	0	0	0	0	0	0	0	0	0	0	0	0.0664711	0.044862	0	0.042017	0	0	0	0	0	0	0	0	0	0	0	0
Ac_ciRNA_00389	0	0	0	0	0	0.0398119	0	0	0	0	0	0	0	0	0	0	0	0	0	0	0	0	0	0	0.0442795	0.170669	0	0	0	0.0418878
Ac_ciRNA_00391	0	0.0676482	0	0	0	0	0	0	0	0	0	0	0	0	0	0	0	0	0	0	0	0	0	0	0.132839	0.256004	0	0.171863	0	0.0837755
Ac_ciRNA_00395	0	0	0	0	0	0	0.141265	0.039197	0.0423501	0.0425238	0.0776925	0.0607031	0	0	0	0	0	0	0	0.041127	0.0643938	0	0	0	0	0	0	0.0859316	0.0377743	0
Ac_ciRNA_00397	0	0	0	0	0	0	0	0	0	0	0	0	0	0	0	0	0	0	0.0414466	0.123381	0	0	0	0	0	0	0	0	0	0
Ac_ciRNA_00404	0	0	0	0	0	0	0.0605422	0.0587955	0.0847003	0	0	0.263047	0	0.0421334	0.0443141	0.067293	0	0.0840339	0	0	0	0	0	0	0	0	0	0	0	0
Ac_ciRNA_00413	0.0631476	0	0	0.0399141	0.125441	0.0597178	0	0	0	0	0	0	0	0	0	0	0	0	0	0	0	0	0	0	0.132839	0.128002	0	0.128897	0	0.0837755
Ac_ciRNA_00416	0.0631476	0.157846	0	0.119742	0	0.179153	0	0	0	0	0	0	0	0	0	0	0	0	0	0	0	0	0	0	1.04057	0.277337	0.256386	0.386692	0	0
Ac_ciRNA_00430	0	0	0	0	0	0	0	0	0	0	0	0.0404687	0.192652	0.1264	0.132942	0.201879	0.0408939	0.588238	0	0	0.150252	0	0.106391	0.0443901	0	0	0	0	0	0
Ac_ciRNA_00437	0	0	0	0	0	0	0	0	0.0423501	0	0	0	0.0642175	0.105333	0	0.22431	0.0613408	0.294119	0	0	0	0	0	0	0	0	0	0	0	0
Ac_ciRNA_00440	0	0	0	0	0	0	0	0	0	0	0.0388462	0	0	0	0	0	0	0	0.103617	0.164508	0	0.121039	0.0851128	0.0887801	0	0	0	0	0	0
Ac_ciRNA_00450	0	0	0	0	0	0	0	0	0	0	2.44731	0	0	0.0632001	0	0.22431	0.53162	0	0.0828932	2.05635	1.54545	2.23923	2.93639	3.61779	0	0	0	0	0	0
Ac_ciRNA_00452	0	0	0	0	0	0	0	0	0	0	0.757502	0	0	0	0	0	0	0	0.559529	0.658032	0.55808	0.706063	1.10647	0.510486	0	0	0	0	0	0
Ac_ciRNA_00453	0	0	0	0	0	0	0	0.039197	0.232926	0.148833	0	0.263047	0	0	0	0	0	0	0	0	0	0	0	0	0	0	0	0	0	0
Ac_ciRNA_00455	0	0	0	0	0	0	0	0	0	0	0	0	0.128435	0.0632001	0.110785	0.067293	0.122682	0	0	0	0	0	0	0	0	0	0	0	0	0
Ac_ciRNA_00456	0	0	0	0	0	0	0.0403615	0	0	0	0	0	0	0	0	0	0	0	0	0	0	0	0	0	0	0	0.039444	0.0644487	0.0944357	0
Ac_ciRNA_00461	0.0631476	0	0	0	0	0.0398119	0.0605422	0	0	0	0	0	0.107029	0.105333	0.0886281	0.089724	0.26581	0.147059	0.0414466	0	0.0429292	0.100866	0	0.0665851	0	0	0	0	0	0
Ac_ciRNA_00464	0	0	0	0	0	0	0	0	0	0	0	0	0.171247	0.0842667	0.110785	0.201879	0.0613408	0.126051	0	0	0	0	0	0	0	0	0	0	0	0
Ac_ciRNA_00473	0	0	0	0	0	0	0.0605422	0	0	0	0	0	0	0	0	0	0	0	0	0	0	0	0	0	0.0442795	0.128002	0	0.107414	0	0
Ac_ciRNA_00475	0.105246	0.180395	0	0	0	0	0	0	0	0	0	0	0	0	0	0	0	0	0	0	0	0	0	0	0	0	0	0	0	0
Ac_ciRNA_00478	0.126295	0.157846	0.0590692	0.219528	0.229976	0.477743	0	0	0	0	0.0776925	0	0	0	0	0	0	0	0	0	0	0	0	0	0.597773	0	0	0.537072	0	0.293214
Ac_ciRNA_00479	0	0	0	0	0	0.119436	0	0	0.0423501	0	0	0	0	0	0	0	0	0	0	0	0	0	0	0	0	0.0853346	0.059166	0.0859316	0	0.146607
Ac_ciRNA_00480	0	0	0	0	0.188162	0	0.464157	0	0	0	0	0	0.684987	0.526667	0.487455	0.583206	0.449833	0.378153	0	0	0	0	0	1.08756	0	0	0	0	0	0
Ac_ciRNA_00487	0	0	0	0	0	0	0	0.13719	0.148225	0.127572	0.116539	0	0.214058	0.0421334	0	0.246741	0	0	0	0.0616905	0.107323	0.161386	0.127669	0.0665851	0	0	0	0	0	0
Ac_ciRNA_00495	0	0	0	0	0	0	0	0	0	0	0	1.09266	0.941857	0.695201	0	1.0094	0	0.96639	0	0	0	0	0	0	0	0	0	0	0	0
Ac_ciRNA_00499	0	0	0	0	0	0	0	0	0	0	0	0	0.278276	0.273867	0.155099	0	0.327151	0.147059	0	0	0.343434	0.423638	0	0.466096	0	0	0	0	0	0
Ac_ciRNA_00510	0.315738	0	0	0	0	0	1.21084	0	0.741127	0	0	0.971249	2.18339	1.7696	0	1.07669	0	0	0.683869	1.08987	1.33081	1.49282	1.3618	3.01852	0	0	0	0	0	0
Ac_ciRNA_00513	0	0.450988	0.315036	0.498927	0.397231	1.13464	0.968676	0	0	0.978048	1.57327	0.951015	2.71854	0	0	1.81691	2.37184	1.00841	1.05689	2.01522	1.50252	2.52166	1.89376	3.24048	0	0	0	0	0	0.900587
Ac_ciRNA_00518	0	0	0	0	0	0	0	0	0	0	0	0	0	0	0	0	0	0	0.0414466	0	0	0.080693	0	0	0	0	0.138054	0.128897	0.0944357	0.125663
Ac_ciRNA_00521	0	0	0	0	0	0	0	0	0	0	0	0	0	0	0	0	0	0	0	1.0693	0	0.585024	1.51075	11.4082	0	0	0	0	0	0
Ac_ciRNA_00522	0	0	0	0	0	0	0	0	0	0	0	0	0.470928	0.337067	0.288041	0.471051	0.715643	0.399161	0	0	0	0	0	0	0	0	0	0	0	0
Ac_ciRNA_00523	0	0	0	0	0	0	0	0	0	0	0	0	0.77061	0.632001	0.731182	0.605637	0.572514	0.42017	0	0	0	0	0	0	0	0	0	0	0	0
Ac_ciRNA_00528	0	0	0	0	0	0	0	0	0	0	0	0	0	0	0.0664711	0.089724	0	0	0	0	0	0	0	0	0	0	0	0	0	0
Ac_ciRNA_00530	0	0	0	0	0	0	0	0	0.0423501	0.0425238	0	0	0	0	0	0	0	0	0	0	0	0	0	0	0	0	0	0	0	0
Ac_ciRNA_00531	0	0.0676482	0.0393795	0	0	0	0	0	0	0	0	0	0	0	0	0	0	0	0	0	0	0	0	0	0.0442795	0	0.216942	0.0859316	0.0566614	0.188495
Ac_ciRNA_00536	0	0	0	0	0	0	0	0	0	0	1.41789	0	0	0	0	0	0	0	0.165786	0.575778	1.58838	0.867449	1.31925	2.13072	0	0	0	0	0	0
Ac_ciRNA_00538	0	0	0	0	0	0	0	0.156788	0	0.616596	4.89463	16.0661	0	0	0	0	0	0	0	0	0.55808	0.221906	0.340451	0.843411	0	0	0	0	0	0
Ac_ciRNA_00539	0.105246	0	0.236277	0	0.125441	0.179153	0	0	0	0	0	0	0	0	0	0	0.122682	0.0840339	0	0	0	0	0	0	0	0	0	0	0	0.146607
Ac_ciRNA_00543	0	0	0	0	0	0	0	0	0	0	0	0	0.107029	0	0.155099	0.22431	0.388492	0.147059	0	0	0	0	0	0	0	0	0	0	0	0
Ac_ciRNA_00546	0.126295	0.112747	0.196897	0.139699	0	0.0995297	0.0605422	0	0.169401	0	0	0	0.107029	0.147467	0.0664711	0.067293	0.0408939	0.0630255	0	0	0	0	0	0	0.132839	0	0.059166	0.107414	0.26442	0
Ac_ciRNA_00549	0	0.112747	0.0984487	0	0.0627206	0	0.181627	0.176387	0	0	0	0	0.214058	0.168533	0.132942	0.067293	0	0.0630255	0	0	0	0	0	0	0	0	0	0	0	0
Ac_ciRNA_00559	0	0	0	0	0	0	0	0	0	0	0	0	0	0.589867	0	0	0	0	0.18651	0	0.300505	0.363118	0	0.399511	0	0	0	0	0	0
Ac_ciRNA_00560	0	0	0	0	0	0	0	0	0	0.595334	0	0	0	0.5688	0	0	0.511173	0.441178	0	0	0	0	0	0	0	0	0	0	0	0
Ac_ciRNA_00564	0	0	0	0	0	0	0	0	0	0	0.524424	0	0	0	0	0	0	0	0	0.472961	0.214646	0.221906	0.297895	0.399511	0	0	0	0	0	0
Ac_ciRNA_00567	0.126295	0.135296	0.236277	0.0798283	0	0	0	0.235182	0.148225	0.0637858	0	0.0404687	0	0	0	0	0	0	0	0	0	0	0	0	0.132839	0.0426673	0.177498	0	0.151097	0
Ac_ciRNA_00569	0	0	0	0	0	0	0	0	0	0	0	0	0	0	0	0	0	0	0	0	0	0	0	0	2.28039	5.80275	0	0	0	0
Ac_ciRNA_00582	0	0	0	0	0	0	0	0	0	0	0	0	0.0428117	0	0.0886281	0.089724	0	0.042017	0	0	0	0	0	0	0	0	0	0	0	0
Ac_ciRNA_00583	0	0	0	0	0	0	0	0	0	0	0.0971156	0	0	0	0	0	0	0	0.103617	0.123381	0.0429292	0.161386	0.106391	0.0887801	0	0	0	0	0	0
Ac_ciRNA_00584	0	0	0	0	0	0	0	0	0	0	0	0	0	0	0	0	0	0	0	0.041127	0	0	0.0425564	0.0443901	0	0	0	0	0	0
Ac_ciRNA_00585	0.0631476	0	0	0.0399141	0	0.0597178	0.0403615	0.0587955	0.0635252	0	0	0.0404687	0.342493	0.3792	0.22157	0.246741	0.347598	0.27311	0	0	0.0429292	0	0	0	0	0	0.039444	0.0429658	0	0.0628316
Ac_ciRNA_00586	0	0	0	0	0	0	0	0	0.12705	0	0.0582694	0.0404687	0.128435	0.105333	0	0	0	0.0840339	0.0621699	0.041127	0	0.0605197	0	0	0	0.0426673	0	0.0859316	0	0
Ac_ciRNA_00588	0.0420984	0	0	0.139699	0.0627206	0.0398119	0.201807	0	0	0	0	0	0	0	0	0	0	0	0	0	0	0	0	0	0.376376	0.704011	0	0	0.0755486	0.460765
Ac_ciRNA_00591	0	0	0	0	0	0	0	0	0	0	0	0	0.0428117	0.105333	0.0443141	0.067293	0	0	0	0	0	0	0	0	0	0	0	0	0	0
Ac_ciRNA_00593	0	0	0	0	0	0	0	0	0	0	0	0	0.0428117	0.0842667	0	0	0	0	0	0	0	0	0	0	0	0	0	0	0	0
Ac_ciRNA_00598	0	0	0	0	0	0	0	0	0	0	0	0	0.749204	0.610934	0.465298	0.89724	0.756537	0.336136	0.538806	0	0.429292	0.302599	0.383008	0.710241	0	0	0	0	0	0
Ac_ciRNA_00599	0	0	0	0	0	0	0	0	0	0	0	0	0.192652	0	0.132942	0.291603	0	0.105042	0	0	0	0	0	0	0	0	0	0	0	0
Ac_ciRNA_00600	0	0	0	0	0.33451	0	0	0	0	0	0	0	1.8195	1.41147	1.17432	2.01879	2.3105	1.00841	0.37302	0.904795	0.493686	0	0.531955	0.688046	0	0	0	0	0	0
Ac_ciRNA_00605	0	0	0	0	0	0	0	0	0.0635252	0.0637858	0	0.0404687	0	0	0	0	0	0	0	0	0	0	0	0	0	0	0	0	0	0
Ac_ciRNA_00624	0	0	0	0	0	0	0	0	0	0	0	0	0	0	0	0	0	0	0	0.205635	0.0429292	0.100866	0	0	0	0	0	0	0	0
Ac_ciRNA_00625	0	0	0	0	0	0	0	0	0	0	0.640963	0	0	0	0	0	0	0	0	3.51636	0.922978	1.4323	0.297895	2.57462	0	0	0	0	0	0
Ac_ciRNA_00627	0	0	0	0	0	0	0	0	0	0	0	0	0	1.43253	12.5409	3.94786	3.98715	14.79	0	0	0	0	0	0	0	0	0	0	0	0
Ac_ciRNA_00631	0	0	0	0	0	0	0	0	0.0635252	0.0425238	0	0	0	0	0	0	0	0	0	0	0	0	0	0	0	0	0	0	0	0
Ac_ciRNA_00632	0.0631476	0	0	0	0	0	0	0	0.211751	0	0	0	0	0	0	0	0	0	0.0828932	0	0.236111	0	0.212782	0	0.154978	0.170669	0	0	0	0.125663
Ac_ciRNA_00633	0	0	0	0	0	0	0	0	0	0	0.582694	0	0.706392	0.547734	3.63375	0	3.98715	6.89078	0	0	0.236111	0	0	0	0	0	0	0	0	0
Ac_ciRNA_00634	0	0	0	0	0	0	0	0	0	0	0.699232	0.991483	0.492334	0.2528	7.91006	3.61139	6.42034	18.0253	0	0	0	0	0	0	0	0	0	0	0	0
Ac_ciRNA_00635	0	0	0	0	0	0	0	0	0	0	0	0	2.11918	1.2008	23.7966	10.6547	24.6999	61.807	0	0	0	0	0	0	1.46122	0	0	0	0	0
Ac_ciRNA_00639	0.105246	0	0.078759	0.0598712	0.146348	0.179153	0.161446	0.274379	0.317626	0.510286	0.135962	0.870077	0.299682	0.3792	0.177256	0.291603	0.429386	0.27311	0	0	0	0	0.0425564	0.0887801	0.309957	0.298671	0.236664	0.343726	0.0755486	0.314158
Ac_ciRNA_00641	0	0	0	0	0	0.0398119	0	0	0	0	0	0	0.0428117	0.0421334	0	0	0	0	0	0	0	0	0	0	0	0.064001	0.039444	0	0	0
Ac_ciRNA_00644	0	0	0	0	0	0	0	0	0.0423501	0.0425238	0	0	0	0	0	0	0	0	0.0414466	0	0	0	0	0	0	0	0.039444	0	0	0
Ac_ciRNA_00650	0	0	0	0	0	0	0	0	0	0	0	0	0.128435	0.1264	0.110785	0.067293	0	0.252102	0	0	0	0	0	0	0	0	0	0	0	0
Ac_ciRNA_00651	0	0	0	0	0	0	0	0	0	0	0	0	0.0856233	0.0632001	0	0.067293	0.0408939	0.0630255	0	0	0	0	0	0	0	0	0	0	0	0
Ac_ciRNA_00653	0	0	0	0	0	0	0	0	0	0	0	0	0.128435	0	0.0443141	0.067293	0	0	0	0	0	0	0	0	0	0	0	0	0	0
Ac_ciRNA_00657	0	0	0	0	0	0	0	0	0	0	0	0	0.0856233	0.147467	0.0886281	0	0	0.0840339	0	0	0	0	0	0	0	0	0	0	0	0
Ac_ciRNA_00658	0	0	0	0	0	0	0	0	0	0	0	0	0.149841	0.0632001	0.0443141	0.112155	0.102235	0.0630255	0	0	0	0	0	0	0	0	0	0	0	0
Ac_ciRNA_00660	0	0	0	0	0	0	0	0	0	0	0	0	0.428117	0.421334	0.332355	0.314034	0.0613408	0.378153	0	0	0	0	0	0	0	0	0	0	0	0
Ac_ciRNA_00661	0	0	0	0	0	0	0	0	0	0	0	0	0.149841	0.1264	0.132942	0	0.0613408	0.105042	0	0	0	0	0	0	0	0	0	0	0	0
Ac_ciRNA_00663	0	0	0	0	0	0	0	0	0	0	0	0	0.214058	0.2528	0.132942	0.134586	0.143129	0.189076	0	0	0	0	0	0	0	0	0	0	0	0
Ac_ciRNA_00664	0	0	0	0	0	0	0	0	0	0	0	0	0.107029	0.147467	0.110785	0.089724	0	0.0630255	0	0	0	0	0	0	0	0	0	0	0	0
Ac_ciRNA_00667	0	0	0	0	0	0	0	0	0	0	0	0	0.278276	0.316	0.487455	0.089724	0.143129	0.147059	0	0	0	0	0	0	0	0	0	0	0	0
Ac_ciRNA_00668	0	0	0	0	0	0	0	0	0	0	0	0	0.0856233	0.105333	0.0886281	0	0	0.042017	0	0	0	0	0	0	0	0	0	0	0	0
Ac_ciRNA_00669	0	0	0	0	0	0	0	0	0	0	0	0	0.192652	0.0421334	0.0886281	0.067293	0	0.0840339	0	0	0	0	0	0	0	0	0	0	0	0
Ac_ciRNA_00670	0	0	0	0	0	0	0	0	0	0	0	0	0.0856233	0.0632001	0.0886281	0.112155	0	0.042017	0	0	0	0	0	0	0	0	0	0	0	0
Ac_ciRNA_00679	0	0	0	0.0798283	0.0836275	0.199059	0.423796	0.156788	0.254101	0.0425238	0.563271	0.101172	0	0.168533	0	0.179448	0	0	1.16051	1.15156	0	1.23057	0.59579	0.732436	0	0	0.256386	0.236312	0	0.230383
Ac_ciRNA_00680	0	0	0	0	0.0627206	0	0	0.039197	0.105875	0.127572	0.0776925	0	0	0	0	0.044862	0	0	0	0.185072	0	0.100866	0.106391	0	0	0	0	0	0	0
Ac_ciRNA_00683	0	0.0676482	0.078759	0	0.0418137	0.0796238	0.121084	0.117591	0.0635252	0.0637858	0	0.121406	0.0642175	0	0	0.044862	0.102235	0	0	0	0	0	0	0	0.088559	0.298671	0.571938	0.644487	0.169984	0.544541
Ac_ciRNA_00684	0	0	0	0	0	0	0	0	0	0	0.0582694	0	0	0	0	0	0	0	0.0621699	0.041127	0.0643938	0.080693	0.106391	0	0	0	0	0	0	0
Ac_ciRNA_00693	0.0420984	0.0901976	0.0393795	0.0798283	0	0.0398119	0.121084	0.0587955	0	0.0425238	0	0.121406	0	0	0	0	0	0	0	0	0	0	0	0	0.154978	0.106668	0.118332	0.128897	0.0566614	0.188495
Ac_ciRNA_00696	0	0	0	0	0	0	0.0605422	0.0587955	0	0.0850477	0	0.0404687	0	0	0	0	0	0	0	0	0	0	0	0	0	0.0426673	0.216942	0.193346	0.0377743	0
Ac_ciRNA_00698	0	0	0	0.0399141	0	0	0	0	0	0.0425238	0	0.0809374	0	0	0	0	0	0	0	0	0	0	0	0	0	0.0426673	0.0986101	0.0644487	0.0566614	0
Ac_ciRNA_00699	0	0	0	0	0	0	0	0	0	0	0.271924	0	0	0	0	0	0.0613408	0	0.227956	0	0	0	0.0851128	0.355121	0	0	0	0	0	0
Ac_ciRNA_00704	0	0	0	0	0	0	0	0	0	0	0	0	0	0	0	0	0	0	0	0	0	0	0	0	0	0.0853346	0.157776	0	0.151097	0.0628316
Ac_ciRNA_00705	0	0	0	0	0	0	0	0	0	0	0	0	0	0	0.0443141	0.044862	0	0	0	0	0	0	0	0	0	0	0	0	0	0
Ac_ciRNA_00708	0	0	0	0	0	0	0	0.156788	0	0.0850477	0	0	0	0	0.0664711	0.067293	0	0	0	0	0	0	0	0	0.0664193	0.149336	0	0.0644487	0.0755486	0.209439
Ac_ciRNA_00712	0	0	0.0393795	0	0	0	0	0	0	0	0	0	0	0	0	0	0	0	0	0	0	0	0	0	0	0.0426673	0	0.128897	0.0944357	0.0418878
Ac_ciRNA_00715	0	0	0	0	0	0	0.0403615	0	0	0.10631	0	0	0.0642175	0.0421334	0	0	0	0.042017	0	0	0	0	0	0	0.088559	0.106668	0	0	0	0
Ac_ciRNA_00723	0	0	0	0	0	0.0398119	0	0	0	0	0	0	0	0	0	0	0	0	0	0	0	0	0	0	0	0.064001	0.157776	0.0859316	0.13221	0.0628316
Ac_ciRNA_00724	0	0	0	0	0	0	0	0	0	0	0	0	0	0	0	0	0	0	0	0	0	0	0	0	0	0	0.039444	0.0429658	0	0
Ac_ciRNA_00730	0	0	0	0	0	0	0	0	0	0	0	0	0.0642175	0	0	0	0.0817877	0.0630255	0	0	0	0	0	0	0	0	0	0	0	0
Ac_ciRNA_00733	0	0	0	0	0	0.0597178	0.0605422	0.0587955	0.0635252	0.0425238	0	0.0404687	0.128435	0.0842667	0.0443141	0.067293	0.0613408	0.0630255	0	0	0	0	0	0	0.0442795	0.106668	0.276108	0.107414	0.0755486	0
Ac_ciRNA_00738	0	0	0	0	0	0	0	0	0	0	0	0	0.214058	0.273867	0.265884	0.246741	0.184022	0	0	0	0	0	0	0	0	0	0	0	0	0
Ac_ciRNA_00743	0	0	0	0	0	0	0	0	0	0	0	0	0	0	0.0664711	0.089724	0	0	0	0	0	0	0	0	0	0	0	0	0	0
Ac_ciRNA_00744	0	0	0	0	0	0	0	0	0	0	0	0	0.0428117	0	0	0	0.102235	0.147059	0	0	0	0	0	0	0	0	0	0	0	0
Ac_ciRNA_00746	0	0	0	0	0	0	0	0.0587955	0	0	0	0	0	0.0632001	0	0.089724	0.122682	0.105042	0	0	0	0	0	0	0	0	0	0	0	0
Ac_ciRNA_00747	0	0	0	0	0	0.0398119	0	0	0.0423501	0	0	0	0	0	0	0	0	0	0	0	0	0	0	0	0.0664193	0.0426673	0.059166	0.0859316	0	0.0628316
Ac_ciRNA_00749	0	0.0676482	0	0	0	0.119436	0.0605422	0	0	0.0850477	0.0388462	0	0	0	0	0	0	0	0	0	0	0	0	0	0	0.149336	0.0986101	0.0644487	0	0.0418878
Ac_ciRNA_00752	0	0	0	0	0	0	0.0403615	0	0	0	0	0	0	0	0	0	0	0	0	0	0	0	0	0	0	0	0.118332	0.0429658	0.0377743	0.125663
Ac_ciRNA_00754	0	0	0	0	0	0	0	0	0	0	0	0	0	0	0	0	0	0	0	0	0	0	0	0	0	0.064001	0.177498	0.107414	0.0755486	0.104719
Ac_ciRNA_00759	0	0	0	0	0	0	0.0605422	0	0	0	0	0	0	0	0	0	0	0	0	0	0	0.141213	0	0	0.199258	0.149336	0.039444	0	0.0377743	0.293214
Ac_ciRNA_00767	0	0	0	0	0	0	0	0.0979925	0.0847003	0.0425238	0	0.0607031	0	0	0	0	0	0	0	0	0	0	0	0	0	0	0	0	0	0
Ac_ciRNA_00771	0	0.0676482	0.157518	0.0399141	0	0.119436	0.201807	0	0	0.0637858	0	0.0404687	0	0	0	0	0	0	0	0	0	0	0	0	0	0	0.453606	0.214829	0.0566614	0.104719
Ac_ciRNA_00773	0	0	0	0	0	0	0	0	0	0	0	0	0.342493	0.0842667	0.265884	0	0	0.27311	0	0	0	0	0	0	0	0	0	0	0	0
Ac_ciRNA_00778	0	0	0	0	0	0	0	0.313576	0	0	0	0	0	0.273867	0.132942	0.291603	0	0.294119	0	0	0	0	0	0	0	0	0	0	0	0
Ac_ciRNA_00787	0	0	0	0	0	0	0	0.352773	0.656427	0.382715	0	0	0.278276	0.0632001	1.04138	0.650499	0	0	0	0	0	0	0	4.26145	0	0	0	0	0	0
Ac_ciRNA_00789	0	0	0.216587	0.179614	0	0	0	0	0	0	0	0	0	0	0	0	0	0	0	0	0	0	0	0	0	0	0	0	0	0
Ac_ciRNA_00795	0	0	0	0	0	0	0	0	0	0	0	0	0.171247	0.0632001	0.0443141	0.112155	0.102235	0.105042	0	0	0	0	0	0	0	0	0	0	0	0
Ac_ciRNA_00801	0	0	0	0	0	0	0	0	0	0	0	0	0	0	0	0	0	0	0	0	0	0	0	0	0	0	0.039444	0.0429658	0	0
Ac_ciRNA_00802	0	0	0	0	0	0	0	0	0.0423501	0	0	0	0	0	0	0	0	0	0	0	0	0	0	0	0.0664193	0	0.177498	0.0644487	0.113323	0.104719
Ac_ciRNA_00805	0.610427	0.766679	0.177208	0.518884	0.731741	0.577272	1.49338	0.999524	0.465851	0.871739	0	0.951015	0	0	0	0	0	0	0	0	0	0	0	0	0.952009	1.38669	0.473328	1.67567	0.283307	2.07344
Ac_ciRNA_00807	0	0	0	0	0	0	0	0	0	0	0	0	0	0	0	0.044862	0	0	0	0	0	0	0	0	0	0	0	0	0.0377743	0.0418878
Ac_ciRNA_00811	0	0	0	0	0	0	0	0	0	0	0.155385	0	0	0	0	0	0	0	0.24868	0	0.128788	0.141213	0.127669	0.13317	0	0	0	0	0	0
Ac_ciRNA_00812	0	0	0	0	0.104534	0.119436	0	0	0	0	0.155385	0.161875	0.192652	0	0.0664711	0	0.204469	0	0	0	0	0.100866	0	0	0.088559	0	0	0	0	0
Ac_ciRNA_00817	0	0	0	0	0	0	0	0.039197	0.0635252	0.0425238	0	0.0404687	0	0	0	0	0	0	0	0	0	0	0	0	0	0	0	0	0	0
Ac_ciRNA_00822	0	0	0	0	0	0	0	0	0	0	0	0	0.0856233	0.0421334	0.22157	0.179448	0.224916	0.210085	0	0	0	0	0	0	0	0	0	0	0	0
Ac_ciRNA_00825	0.0420984	0	0	0	0	0	0	0	0	0	0	0	0	0	0	0	0	0	0	0	0	0	0	0	0.088559	0.106668	0	0.0429658	0	0.0837755
Ac_ciRNA_00839	0	0	0	0	0	0	0	0	0	0	0	0	0.192652	0.147467	0.22157	0.134586	0.122682	0.147059	0	0	0	0	0	0	0	0	0	0	0	0
Ac_ciRNA_00841	0.147344	0.112747	0.118138	0.159657	0.167255	0.199059	0.363253	0	0	0	0	0.0404687	0.684987	0.4424	0.553926	0.785085	0.633855	0.714288	0.0828932	0.143945	0	0.100866	0.0851128	0	0.752752	1.32269	1.55804	1.13859	0.642163	1.17286
Ac_ciRNA_00847	0	0	0	0	0	0	0	0	0	0	0	0	0.149841	0.168533	0.288041	0.157017	0.163575	0.210085	0	0	0	0	0	0	0	0	0	0	0	0
Ac_ciRNA_00851	0	0.112747	0	0.0399141	0	0.159248	0	0	0	0	0	0	0	0	0	0	0	0	0	0	0	0	0.0425564	0	0.088559	0.106668	0.138054	0.0644487	0.0755486	0
Ac_ciRNA_00854	0	0	0	0	0	0	0	0.0587955	0.0847003	0.10631	0	0.121406	0	0	0	0	0	0	0	0	0	0	0	0	0	0	0	0	0	0
Ac_ciRNA_00857	0.378885	0.541185	0.649762	0.419098	0.313603	0.437931	0.887953	0.0587955	0.190576	0.170095	0	0.202344	0.192652	0.1896	0.199413	0.314034	0.163575	0.315127	0.0414466	0	0	0.0605197	0.0425564	0	0.819171	0.512008	0.926935	0.945247	0.13221	0.335102
Ac_ciRNA_00860	0	0	0	0	0	0	0	0.0979925	0	0	0	0	0.171247	0	0.110785	0	0.0408939	0.0630255	0	0	0	0	0	0	0	0	0	0	0	0
Ac_ciRNA_00864	0.0631476	0.0901976	0	0.119742	0	0.0995297	0	0	0	0	0	0	0	0	0	0	0	0	0	0	0	0	0	0	0	0.149336	0	0.0429658	0	0.0628316
Ac_ciRNA_00865	0.147344	0.135296	0	0.0798283	0.0627206	0.0796238	0	0	0	0	0	0	0	0	0	0	0	0	0	0	0	0	0	0	0.243537	0.106668	0.177498	0.322243	0.0566614	0.37699
Ac_ciRNA_00869	0	0	0	0	0	0	0	0	0	0	0.233077	0	0	0	0	0	0	0	0.103617	0.123381	0.236111	0.161386	0.0851128	0.22195	0	0	0	0	0	0
Ac_ciRNA_00883	0	0.0450988	0.0590692	0	0	0	0	0	0	0	0	0	0	0	0.0664711	0.089724	0.0408939	0.042017	0	0	0	0	0	0	0.0442795	0	0.177498	0.0859316	0	0.0837755
Ac_ciRNA_00884	0	0	0	0.0598712	0.0627206	0.0597178	0.0403615	0	0	0.0425238	0	0	0	0	0	0	0	0	0	0	0	0	0	0	0	0.128002	0.118332	0.0644487	0.0377743	0.125663
Ac_ciRNA_00887	0	0	0	0	0	0	0	0	0	0	0	0	0.0642175	0.0632001	0.0443141	0.044862	0	0.0630255	0	0	0	0	0	0	0	0	0	0	0	0
Ac_ciRNA_00888	0	0	0	0	0	0.0597178	0	0	0	0	0	0	0	0	0.0886281	0.112155	0.0817877	0	0	0	0	0	0	0	0	0.0853346	0	0.0429658	0	0.0837755
Ac_ciRNA_00893	0	0	0	0	0	0	0	0	0	0	0	0	0	0	0.22157	0.336465	0	0	0.227956	0.205635	0.171717	0	0.148947	0	0	0	0	0	0	0
Ac_ciRNA_00895	0	0	0	0	0	0	0	0	0	0	0	0	0	0	0	0.044862	0.0408939	0.0630255	0	0	0	0	0	0	0	0	0	0	0	0
Ac_ciRNA_00896	0	0	0	0	0	0	0	0	0	0	0	0	0	0	0	0	0	0	0.227956	0.0822541	0.0858584	0	0	0	0	0	0	0	0	0
Ac_ciRNA_00898	0.105246	0.0676482	0	0.0598712	0	0.0796238	0	0	0	0	0	0	0.0642175	0.105333	0	0.089724	0	0	0	0	0	0	0	0	0	0	0	0.15038	0	0.0628316
Ac_ciRNA_00903	0	0	0	0.0399141	0	0	0	0	0.0423501	0.0425238	0	0.0404687	0.235464	0.105333	0.155099	0.157017	0.143129	0.147059	0	0	0	0	0	0	0	0	0	0	0	0
Ac_ciRNA_00904	0	0	0	0	0	0	0	0.039197	0	0	0	0.0607031	0.128435	0.1896	0.110785	0.089724	0.0613408	0.0840339	0	0	0	0	0	0	0	0	0	0	0	0
Ac_ciRNA_00906	0	0	0	0	0	0	0	0	0	0	0	0	0.0856233	0.0421334	0	0	0	0	0	0	0	0	0	0	0	0.0853346	0.039444	0.193346	0	0.230383
Ac_ciRNA_00908	0	0	0	0	0	0	0	0	0	0	0	0	0	0	0	0	0	0	0.0828932	0	0.0858584	0.100866	0.0638346	0.0443901	0	0	0	0	0	0
Ac_ciRNA_00914	0	0	0	0	0	0	0	0	0	0	0	0	0	0	0	0	0	0	0	0	0	0	0	0	0.0442795	0	0.059166	0	0.0566614	0.0628316
Ac_ciRNA_00916	0.0841968	0.0901976	0.0393795	0.0997853	0.0627206	0.0597178	0.181627	0.039197	0.0635252	0.0637858	0.0582694	0.0607031	0.0856233	0.168533	0.110785	0.067293	0.122682	0.042017	0.0621699	0.041127	0	0.0403465	0	0.0665851	0.265677	0.405339	0.236664	0.472624	0.0377743	0.188495
Ac_ciRNA_00917	0.168394	0.248043	0.078759	0.119742	0.229976	0.119436	0.181627	0.176387	0.275276	0.233881	0.155385	0.121406	0.813422	0.610934	0.443141	0.740223	0.511173	0.609246	0.24868	0	0.300505	0.262252	0.0851128	0	0.420655	0.512008	0.414162	0.794867	0.245533	0.879643
Ac_ciRNA_00922	0	0	0	0	0	0	0	0	0	0	0	0	0.0428117	0.105333	0	0.089724	0	0	0	0	0	0	0	0	0	0	0	0	0	0
Ac_ciRNA_00926	0	0	0	0	0	0	0	0	0	0	0	0	0	0	0	0	0	0	0.0621699	0.0822541	0	0.100866	0	0.0443901	0	0	0	0	0	0
Ac_ciRNA_00928	0	0	0	0	0	0	0	0	0	0	0	0	0	0	0	0	0	0	0.0414466	0.041127	0	0	0	0	0	0	0	0	0	0
Ac_ciRNA_00929	0	0	0	0	0	0	0	0	0	0.127572	0.0582694	0.101172	0	0	0	0	0.0408939	0	0	0	0	0	0	0	0	0	0	0	0	0
Ac_ciRNA_00931	0	0	0	0	0	0	0	0	0	0	0	0	0.149841	0.0632001	0	0.044862	0.0817877	0	0	0	0	0	0	0	0	0	0	0	0	0
Ac_ciRNA_00933	0	0	0	0	0	0	0	0	0	0	0.466155	0	0	0	0	0	0	0	0.518083	0.41127	0.300505	0.484158	0.893684	0.710241	0	0	0	0	0	0
Ac_ciRNA_00935	0	0	0	0	0	0	0	0	0	0	0.0582694	0	0	0	0	0	0	0	0	0	0	0.242079	0.148947	0.488291	0	0	0	0	0	0
Ac_ciRNA_00938	0	0	0	0	0	0	0	0	0	0	0	0	0.0856233	0.0421334	0	0.044862	0	0	0	0	0	0	0	0	0	0	0	0	0	0
Ac_ciRNA_00939	0	0	0	0	0	0	0	0	0	0.170095	0.0582694	0.14164	0.171247	0.147467	0	0	0.0613408	0	0	0	0	0	0	0	0	0	0	0	0	0
Ac_ciRNA_00945	0	0	0	0	0	0	0	0	0	0	0	0	0	0.0842667	0.0443141	0	0.0817877	0.042017	0	0	0	0	0	0	0	0	0.118332	0	0.0377743	0
Ac_ciRNA_00948	0	0	0	0	0	0	0	0	0	0	0	0	0.214058	0	0.155099	0.134586	0.102235	0.189076	0	0	0	0	0	0	0	0	0	0	0	0
Ac_ciRNA_00950	0	0	0	0	0	0	0	0	0	0	0	0	0.107029	0.0842667	0	0	0.0408939	0.126051	0	0	0	0	0	0	0	0	0	0	0	0
Ac_ciRNA_00957	0	0	0	0	0	0	0	0	0	0	0.233077	0	0	0	0	0	0	0	0.31085	0	0.257575	0	0.127669	0.0665851	0	0	0	0	0	0
Ac_ciRNA_00963	0.0420984	0	0	0	0	0.0597178	0	0	0.0847003	0	0	0	0	0	0	0	0	0	0	0	0	0	0	0	0	0.0426673	0	0	0.0566614	0.0628316
Ac_ciRNA_00964	0	0	0	0	0	0	0	0	0	0	0	0	0.278276	0.484534	0	0	0	0	0	0	0	0	0	0	0	0	0	0	0	0
Ac_ciRNA_00966	0	0	0	0	0	0	0	0	0	0	0	0	0.192652	0.0842667	0.0443141	0	0.0817877	0	0	0	0	0	0	0	0	0	0	0	0	0
Ac_ciRNA_00967	0	0	0	0	0	0	0	0	0	0	0	0	0.107029	0.0842667	0	0.089724	0	0	0	0	0	0	0	0	0	0	0	0	0	0
Ac_ciRNA_00972	0	0	0.0590692	0.0399141	0	0	0	0	0	0.0637858	0	0	0	0	0	0	0	0	0	0	0	0	0	0	0.0442795	0	0.118332	0	0	0
Ac_ciRNA_00973	0	0	0.0590692	0	0	0	0.080723	0.0587955	0.0423501	0	0	0.0809374	0	0	0	0	0	0	0	0	0	0	0	0	0	0	0.059166	0	0	0
Ac_ciRNA_00981	0	0	0	0	0	0	0	0	0	0	0	0	0.25687	0.168533	0	0	0	0	0	0	0	0	0	0	0	0	0	0	0	0
Ac_ciRNA_00984	0	0	0.0393795	0	0	0.0398119	0.0605422	0.078394	0.0423501	0	0	0	0	0	0	0	0	0	0	0	0	0	0	0	0.0442795	0	0.236664	0.15038	0.0566614	0.0418878
Ac_ciRNA_00985	0.126295	0.135296	0.196897	0.0598712	0.250882	0.517554	0.26235	0.352773	0.232926	0.191357	0.427309	0.667734	1.30576	1.28507	0.642554	0.942102	0.858771	1.00841	0.207233	0.308453	0.343434	0.141213	0.340451	0.577071	0.619913	0.597342	0.216942	0.257795	0.169984	0.502653
Ac_ciRNA_00993	0	0	0	0	0	0	0.0605422	0	0.0635252	0.0425238	0.0388462	0.0404687	0	0	0	0	0	0	0.0414466	0.0616905	0.107323	0.080693	0.106391	0.0665851	0	0	0.138054	0	0.13221	0.0418878
Ac_ciRNA_00997	0	0.0450988	0	0	0	0	0	0	0	0	0	0	0	0	0	0	0	0	0	0	0	0	0	0	0	0	0.039444	0.0859316	0	0
Ac_ciRNA_01000	0	0	0	0	0	0	0	0	2.09633	0	5.4579	0	0	0	0	0	0	0	2.4039	4.29777	3.1553	5.16435	0	9.23313	0	0	0	0	0	0
Ac_ciRNA_01007	0.0420984	0	0	0	0	0	0	0	0	0	0	0	0	0	0	0	0	0	0	0	0	0	0	0	0	0	0.059166	0	0.0944357	0.0418878
Ac_ciRNA_01010	0	0	0	0.0598712	0	0.0398119	0	0	0	0	0	0	0	0	0	0	0	0	0	0	0	0.0403465	0	0	0	0.064001	0.039444	0.0859316	0	0
Ac_ciRNA_01015	0.0631476	0	0	0	0	0	0	0	0	0	0	0.0809374	0	0	0	0	0	0	0	0	0	0	0	0	0	0.0426673	0.0788881	0.0644487	0	0.0418878
Ac_ciRNA_01018	0	0	0	0	0	0	0	0	0	0	0.0388462	0	0	0	0.0443141	0	0.0408939	0	0.0621699	0.102818	0.171717	0.080693	0.0638346	0	0	0	0	0	0	0
Ac_ciRNA_01019	0	0	0	0	0	0	0	0	0	0	0	0	0.0428117	0.0421334	0.0664711	0.067293	0.0613408	0	0	0.0616905	0	0	0	0.0665851	0	0	0	0	0	0
Ac_ciRNA_01024	0	0	0	0	0	0	0	0	0	0	0	0	0.0428117	0.0421334	0	0	0	0	0	0	0	0	0	0	0	0	0	0	0.0377743	0
Ac_ciRNA_01028	1.11561	1.01472	0.925418	0.838197	1.98615	1.31379	1.00904	1.03872	1.20698	1.04183	0.835194	2.14484	0	0	0	0	0	0	0	0	0	0	0	0	1.48336	1.23735	0.709992	1.31046	1.28433	0.942474
Ac_ciRNA_01029	0	0	0	0	0	0	0	0.117591	0.402326	0.233881	0.0388462	0.566562	0	0	0	0	0	0	0	0	0	0	0	0	0	0	0	0	0	0
Ac_ciRNA_01032	0	0	0	0	0	0	0	0	0	0	0	0	0.0856233	0.0842667	0.0443141	0	0.0613408	0	0	0	0	0	0	0	0	0	0	0	0	0
Ac_ciRNA_01033	0	0	0	0	0	0	0	0	0	0	0	0	0.171247	0	0.0886281	0.044862	0.0817877	0.0840339	0	0	0	0	0	0	0	0	0	0	0	0
Ac_ciRNA_01035	0	0	0.0393795	0	0.0418137	0	0.161446	0	0.0423501	0.0850477	0	0.0809374	0	0	0	0	0	0	0	0	0	0	0	0	0.132839	0.0853346	0.374718	0.0644487	0.453291	0.146607
Ac_ciRNA_01038	0.231541	0.36079	0	0.119742	0.104534	0.298589	0.201807	0	0	0	0	0	0	0	0	0	0	0	0	0	0	0	0	0	1.17341	0.704011	0.216942	0.945247	0.0377743	0.188495
Ac_ciRNA_01041	0	0	0	0	0	0	0	0	0	0	0	0	0.0856233	0.0421334	0	0	0	0	0	0	0	0	0	0	0	0	0	0	0	0
Ac_ciRNA_01043	0	0	0	0	0	0	0	0	0	0	0	0	0	0	0	0	0	0	0	0	0.107323	0.080693	0	0	0	0	0	0	0	0
Ac_ciRNA_01047	0	0	0	0	0	0	0	0	0	0	0	0	0	0	0	0	0	0	0	0	0	0	0	0	0	0	0.039444	0	0.0377743	0.0628316
Ac_ciRNA_01059	0	0	0	0	0	0	0	0.0979925	0.0423501	0.0850477	0	0	0	0	0	0	0	0	0	0	0	0	0	0	0	0	0	0	0	0
Ac_ciRNA_01064	0	0	0	0	0	0	0	0	0.0423501	0	0	0.0809374	0	0	0.0886281	0.067293	0	0.0630255	0	0	0	0	0	0	0	0	0	0	0	0
Ac_ciRNA_01070	0	0	0	0	0	0	0	0	0	0	0	0	0	0	0	0	0	0	0.0414466	0.0616905	0	0	0	0.0887801	0	0	0	0	0	0
Ac_ciRNA_01073	0	0	0	0	0	0	0	0	0	0	0	0	0	0	0	0	0	0	0.0414466	0.0616905	0	0	0	0.0665851	0	0	0	0	0	0
Ac_ciRNA_01076	0	0	0	0	0	0	0	0	0	0	0	0	0.0856233	0.0632001	0.0443141	0	0	0	0	0	0	0	0	0	0	0	0	0	0	0
Ac_ciRNA_01077	0	0	0	0	0	0	0	0	0.0423501	0.0425238	0	0.0607031	0	0	0	0	0	0	0	0	0	0	0	0	0	0	0	0	0	0
Ac_ciRNA_01082	0	0	0	0	0	0	0	0.13719	0.232926	0.127572	0.0388462	0.101172	1.04889	0.842667	0.997066	0.829947	0.613408	0.96639	0	0	0	0	0	0	0	0	0	0	0	0
Ac_ciRNA_01087	0	0	0	0	0	0	0	0	0	0	0	0	0.107029	0.0421334	0	0	0.102235	0	0	0	0	0	0	0	0	0	0	0	0	0
Ac_ciRNA_01094	0.315738	0.473537	0	0.259442	0.209069	0.656896	0.28253	0.274379	0	0	0	0	0	0.294934	0	0	0	0	0	0	0	0	0.297895	0	0.442795	0.512008	0	0.51559	0	0.502653
Ac_ciRNA_01097	0	0	0	0	0	0	0	0.411569	0	0.425238	0.252501	0.485625	1.0917	1.62213	1.08569	0.942102	0.674749	0.987399	0	0	0	0	0	0	0	0	0	0	0	0
Ac_ciRNA_01099	0	0	0	0	0	0	0.0403615	0.078394	0.0423501	0.0425238	0	0.0404687	0	0	0	0	0	0	0	0	0	0	0	0	0	0	0	0	0	0
Ac_ciRNA_01100	0	0	0	0	0	0	0	0	0	0	0	0	0.0428117	0	0	0	0.122682	0.105042	0	0	0	0	0	0	0	0	0	0	0	0
Ac_ciRNA_01103	0	0	0	0	0	0	0.0605422	0	0	0	0	0	0.0642175	0.105333	0	0.044862	0.102235	0.042017	0	0	0	0	0	0	0	0	0	0	0	0
Ac_ciRNA_01112	0.168394	0.248043	0.137828	0.119742	0	0	0.141265	0.52916	0	0.10631	0.485578	0	0	1.47467	0.465298	0.67293	0.695196	0.210085	0.393743	0.493524	0.321969	0.383292	0.489399	0	0	0	0	0.408175	0.358856	0.251327
Ac_ciRNA_01115	0	0.0676482	0	0	0	0	0.0605422	0	0.0423501	0	0	0	0.706392	0	0	0	0	0	0	0	0	0	0	0	0	0	0	0	0.113323	0.125663
Ac_ciRNA_01117	0	0	0	0.0598712	0	0.0796238	0	0	0	0	0.0388462	0.0607031	0	0	0	0	0	0	0	0.041127	0	0	0	0.0443901	0.0664193	0.170669	0.0788881	0.107414	0.0377743	0
Ac_ciRNA_01119	0	0.0450988	0	0	0	0	0	0	0	0	0	0	0	0	0	0	0	0	0	0	0	0	0	0	0.0664193	0.064001	0.19722	0.171863	0.113323	0.0628316
Ac_ciRNA_01127	0	0	0	0	0	0.0597178	0.0403615	0	0	0	0	0	0	0	0	0	0	0	0	0	0	0	0	0	0.110699	0.0426673	0	0.0429658	0	0
Ac_ciRNA_01132	0	0	0	0	0	0	0	0.078394	0	0	0	0	0.0642175	0.0842667	0.0443141	0.044862	0.0817877	0	0	0	0	0	0	0	0.0442795	0	0.039444	0.0429658	0	0
Ac_ciRNA_01134	0.0841968	0	0	0	0	0	0	0	0	0	0	0	0	0	0	0	0	0	0.0621699	0.0822541	0	0	0	0	0	0	0	0.0429658	0.0566614	0
Ac_ciRNA_01135	0.231541	0	0.078759	0.159657	0	0.238871	0	0	0.529377	0.148833	0.543847	0.242812	0	0.463467	0.398826	0	0.572514	0	0.393743	0	0	0	0.404286	0.909996	0	1.02402	0.414162	0.386692	0.491066	0.460765
Ac_ciRNA_01138	0.315738	0	0.275656	0.239485	0.439044	0	0	0	0.359976	0	0	0	0	0	0	0	0	0	0.393743	0	0	0	0	1.37609	0.974149	1.42935	0.946657	0	0	0
Ac_ciRNA_01140	0	0	0	0.0598712	0	0	0	0	0	0	0	0	0	0	0	0	0	0	0	0.0616905	0	0	0	0.0665851	2.36895	2.79471	0	1.03118	0	0
Ac_ciRNA_01144	0	0	0	0	0	0	0	0	0	0	0	0	0	0	0	0	0	0	0	0	0	0	0	0	0	0.0853346	0.19722	0.0429658	0.0755486	0
Ac_ciRNA_01150	0	0	0	0	0	0	0	0	0	0	0	0	0.0856233	0.0842667	0.288041	0.067293	0.184022	0.126051	0	0	0	0	0	0	0	0	0	0	0	0
Ac_ciRNA_01153	0	0	0	0	0	0	0.0403615	0	0	0	0	0	0	0	0	0	0	0	0	0	0	0	0	0	0.132839	0.0853346	0.059166	0.107414	0.0944357	0.188495
Ac_ciRNA_01154	0	0.0450988	0	0	0.0418137	0	0.0403615	0	0.0423501	0.0425238	0	0.0607031	0.0856233	0	0.0664711	0	0.0613408	0.0840339	0	0.041127	0	0	0	0.0665851	0	0	0.118332	0.0429658	0.0377743	0.104719
Ac_ciRNA_01158	0	0	0	0	0	0	0	0	0	0	0	0	0	0	0	0	0.0408939	0.042017	0	0	0	0	0	0	0	0	0	0	0	0
Ac_ciRNA_01159	0.0841968	0.0450988	0.0590692	0.0997853	0	0.0597178	0.161446	0.039197	0.0635252	0.10631	0	0.0404687	0.107029	0.0421334	0.0664711	0.067293	0.102235	0.0840339	0	0.041127	0	0	0	0.0443901	0.132839	0.256004	0.0986101	0.193346	0	0.125663
Ac_ciRNA_01160	0.0420984	0	0	0	0	0	0	0	0	0	0	0.0404687	0.0428117	0	0.0443141	0.044862	0.0408939	0.042017	0	0	0	0	0	0	0	0.0426673	0	0	0	0
Ac_ciRNA_01171	0	0	0	0	0.0418137	0.0597178	0	0	0	0.0425238	0	0	0.0428117	0	0	0.044862	0.0817877	0.042017	0	0	0	0	0	0	0	0.064001	0	0	0	0
Ac_ciRNA_01176	0.0631476	0.0676482	0.078759	0.259442	0	0.0597178	0	0	0	0	0	0	0	0	0	0	0	0	0	0	0	0	0	0	0.154978	0.149336	0.256386	0.257795	0.151097	0.293214
Ac_ciRNA_01180	0	0	0	0	0	0	0	0	0	0	0.0971156	0	0	0	0	0	0	0	0.0621699	0.0822541	0.0429292	0.0403465	0.0425564	0.13317	0	0	0	0	0	0
Ac_ciRNA_01181	0	0.0450988	0.157518	0.0598712	0	0.0597178	0.0403615	0	0	0	0	0	0	0	0	0	0	0	0	0	0	0	0	0	0.0664193	0.341338	0.512772	0.300761	0.283307	0.167551
Ac_ciRNA_01186	0	0	0	0	0	0	0	0	0	0	0	0	0.0428117	0.0632001	0.0664711	0	0	0.0630255	0	0	0	0	0	0	0	0	0	0	0	0
Ac_ciRNA_01188	0	0	0	0	0	0	0	0.0979925	0.0635252	0.127572	0	0.101172	0	0	0	0	0	0	0	0	0	0	0	0	0	0	0	0	0	0
Ac_ciRNA_01192	0	0	0	0	0	0	0	0	0	0	0	0	0.492334	0.358134	0.509612	0.650499	0.490726	0.609246	0	0	0	0	0	0	0	0	0	0	0	0
Ac_ciRNA_01193	0	0	0	0	0	0	0	0	0	0	0	0	0.0642175	0.0421334	0	0.044862	0.0613408	0	0	0	0	0	0	0	0	0	0	0	0	0
Ac_ciRNA_01197	0	0	0	0	0	0	0	0	0	0	0	0	0.0642175	0.0842667	0.110785	0.067293	0.0613408	0.105042	0.0414466	0	0	0	0	0.0443901	0	0	0	0.0644487	0	0
Ac_ciRNA_01198	0	0	0	0	0	0	0	0	0	0	0.0582694	0	0	0	0	0	0	0	0.12434	0.0822541	0.0643938	0	0.127669	0	0	0	0	0	0	0
Ac_ciRNA_01201	0	0	0	0	0	0	0	0	0	0	0	0	0	0	0	0	0	0	0.0621699	0.041127	0	0	0	0	0	0	0	0	0	0
Ac_ciRNA_01202	0	0	0	0.0399141	0	0	0	0	0	0	0	0	0	0	0	0	0	0.0630255	0.12434	0.699159	0.214646	0.342945	0.191504	0.199755	0	0.128002	0	0	0	0
Ac_ciRNA_01203	0	0	0	0	0	0	0	0	0	0	0	0	0	0	0	0.067293	0.0817877	0.0840339	0	0	0	0	0	0	0	0	0	0	0	0
Ac_ciRNA_01208	0	0	0	0	0	0	0	0	0	0	0	0	0	0	0.0443141	0	0	0	0	0	0	0	0	0	0	0	0.0788881	0	0.0377743	0.0837755
Ac_ciRNA_01209	0	0	0	0	0	0	0	0	0	0	0	0	0	0	0	0	0	0	0.0828932	0.123381	0.0214646	0.0605197	0.0851128	0	0	0	0	0	0	0
Ac_ciRNA_01212	0	0	0	0	0	0	0	0	0	0	0	0	0	0	0.0664711	0.067293	0	0	0	0	0	0	0	0	0	0	0	0	0	0
Ac_ciRNA_01214	0	0.0450988	0	0	0	0	0	0	0	0	0	0	0	0	0	0	0	0	0.0414466	0.102818	0.0643938	0	0	0	0	0	0	0	0	0
Ac_ciRNA_01219	0	0	0	0	0	0	0	0	0	0	0	0	0.107029	0	0.0886281	0.089724	0	0	0	0	0	0	0	0	0	0	0	0	0	0
Ac_ciRNA_01225	0	0	0	0	0	0	0	0	0.0847003	0	0	0	0.428117	0	0.288041	1.21127	1.36994	0.27311	0	0	0	0	0	0	0	0	0	0	0	0.104719
Ac_ciRNA_01226	0.0631476	0.248043	0	0.159657	0.313603	0.457837	0.343073	0.313576	0.105875	0.318929	0.31077	0.263047	0	0	0	0	0	0	0	0	0	0.383292	0	0	0	0.426673	0.118332	0.257795	0	0.209439
Ac_ciRNA_01228	0	0	0	0	0	0	0	0	0	0	0.543847	0	0	0	0	0	0	0	0.103617	1.19268	0.364898	1.02884	1.00008	3.92852	0	0	0	0	0	0
Ac_ciRNA_01229	0.147344	0	0	0	0.33451	0	0	0.117591	0	0.191357	0.291347	0.222578	0	0	0	0	0	0	0	0	0	0.342945	0.404286	0	0.708472	0.405339	0	0	0	0.209439
Ac_ciRNA_01231	0	0.0901976	0	0	0.104534	0	0.100904	0.156788	0.0423501	0.0425238	0	0.0607031	0.0428117	0.0421334	0.0886281	0	0	0	0	0	0	0	0	0	0.0442795	0.0426673	0.216942	0.107414	0.0566614	0.230383
Ac_ciRNA_01232	0	0	0.118138	0.0598712	0	0.0398119	0.181627	0.0979925	0.12705	0.191357	0	0	0	0	0	0	0	0	0	0	0	0	0	0	0	0.0426673	0.059166	0.0644487	0	0
Ac_ciRNA_01241	0	0	0	0	0	0	0	0	0.0423501	0	0.0776925	0	0	0	0	0	0	0	0.269403	0.164508	0.150252	0.121039	0.0638346	0.155365	0	0	0	0	0	0
Ac_ciRNA_01243	0	0	0	0	0	0.0398119	0	0.0587955	0.12705	0.10631	0	0	0	0	0	0	0	0	0	0	0	0	0	0	0.088559	0	0.039444	0	0	0
Ac_ciRNA_01247	0	0	0	0	0	0	0	0	0	0	0	0	0	0	0	0	0	0	0.0414466	0.0822541	0	0.121039	0.0638346	0	0	0	0	0	0	0
Ac_ciRNA_01253	0	0	0	0	0	0	0	0.176387	0.169401	0.127572	0	0.161875	0	0	0	0	0	0	0	0	0	0	0	0	0	0	0	0	0	0
Ac_ciRNA_01263	0	0.0450988	0	0	0	0	0	0	0	0	0	0	0.0642175	0.0421334	0.110785	0.134586	0.0613408	0.189076	0.0414466	0	0	0	0	0	0	0.0426673	0.059166	0	0	0
Ac_ciRNA_01264	0	0	0	0	0	0	0	0	0	0	0.757502	0	0	0	0	0	0	0	0.0828932	0.123381	0.257575	0.201732	0.148947	0	0	0	0	0	0	0
Ac_ciRNA_01266	0	0	0	0	0	0	0	0	0	0	2.3502	0	0	0	0	0	0	0	0.227956	0.472961	0.450757	0.524504	0.787293	1.73121	0	0	0	0	0	0
Ac_ciRNA_01267	0	0	0	0	0	0.0995297	0	0.078394	0	0.0637858	0	0	0.813422	0.716267	0	1.18884	0.899665	0.882356	0	0	0	0	0.148947	0.355121	0.309957	0.789345	0.315552	0.429658	0.0755486	0.146607
Ac_ciRNA_01272	0	0	0	0	0	0	0	0	0.0847003	0	0	0	0	0	0	0	0	0	0	0.287889	0.0858584	0.080693	0	0.288535	0.154978	0	0	0	0	0
Ac_ciRNA_01276	0	0	0	0	0	0	0	0	0	0	0	0	0	0	0	0	0	0	0.0207233	0.0205635	0.0214646	0.0403465	0	0	0	0	0	0	0	0
Ac_ciRNA_01277	0	0	0	0	0	0	0	0	0	0	0	0	0	0	0	0	0	0	0.331573	0.534651	0	0.322772	0.340451	0.332926	0	0	0	0	0	0
Ac_ciRNA_01282	0.147344	0.180395	0.137828	0.199571	0.376324	0.318495	0	0	0	0	0	0	0	0	0	0	0	0	0	0	0	0	0	0	0.464935	0.704011	0.374718	0.279278	0.377743	0.523597
Ac_ciRNA_01284	0	0	0	0.0399141	0	0	0	0	0	0	0	0	0.0428117	0	0.0664711	0.089724	0.0613408	0	0	0	0	0	0	0	0	0	0	0	0	0
Ac_ciRNA_01286	0	0	0	0	0	0	0	0	0.0847003	0	0	0	0	0	0.110785	0	0.122682	0.042017	0	0	0	0	0	0	0	0	0	0	0	0
Ac_ciRNA_01287	0	0	0	0	0	0	0	0	0	0	0	0.0404687	0.0856233	0.0421334	0.0664711	0.067293	0.122682	0	0	0	0	0	0	0	0	0	0	0	0	0
Ac_ciRNA_01289	0	0	0	0	0	0	0	0	0	0	0	0	1.477	0.674134	0.952752	1.23371	2.04469	0.777314	0	0	0	0	0	0	0	0	0	0	0	0
Ac_ciRNA_01290	0	0	0	0	0.271789	0.318495	0	0	0	0	0	0	0	0	0	0	0	0	0	0	0	0	0	0.510486	0	0	0	0	0	0
Ac_ciRNA_01292	0	0	0	0	0	0	0	0	0	0	0.0388462	0	0	0	0	0	0	0	0	0	0	0	0.0425564	0.0443901	0	0	0	0	0	0
Ac_ciRNA_01296	0	0	0	0	0	0	0	0.0979925	0.12705	0	0.0388462	0.303515	0.363899	0.147467	0.110785	0.179448	0.245363	0.189076	0	0	0	0	0	0	0	0	0	0	0	0
Ac_ciRNA_01300	0	0	0	0	0	0.0597178	0	0	0	0	0	0	0.0856233	0	0.0443141	0	0.0613408	0	0	0	0	0	0	0	0.0442795	0.106668	0.039444	0	0.0755486	0
Ac_ciRNA_01302	0	0	0	0	0	0	0	0	0	0	0	0	0	0	0.0886281	0.089724	0.0408939	0.0630255	0	0	0	0	0	0	0	0	0	0	0	0
Ac_ciRNA_01307	0	0	0	0	0	0.0398119	0	0	0	0	0	0	0	0	0	0	0	0	0	0	0	0	0	0	0.0442795	0.128002	0	0.128897	0	0
Ac_ciRNA_01311	0	0	0	0	0	0	0	0	0.0635252	0	0	0	0	0	0	0	0	0	0	0	0	0	0	0	0	0.128002	0	0.0859316	0.0755486	0.146607
Ac_ciRNA_01312	0.0631476	0	0	0	0	0	0	0	0	0	0.0388462	0	0	0	0	0	0	0	0	0	0.0429292	0.0605197	0	0.0665851	0.0442795	0	0	0	0	0
Ac_ciRNA_01315	0	0.0450988	0	0	0.125441	0.0597178	0	0	0	0	0	0	0	0	0	0	0	0	0	0	0	0	0	0	0.199258	0	0	0.214829	0	0.335102
Ac_ciRNA_01316	0	0	0	0	0.0418137	0.0398119	0	0	0	0	0	0	0	0	0	0	0	0	0	0	0	0	0	0	0	0.0426673	0	0	0	0.0418878
Ac_ciRNA_01319	0	0	0	0	0	0	0	0	0	0	0.0388462	0	0	0	0	0	0	0	0.0828932	0	0	0.0403465	0.127669	0.0443901	0	0	0	0	0	0
Ac_ciRNA_01325	0	0	0	0	0	0	0	0	0	0	0	0	0.128435	0	0.0886281	0.089724	0.0817877	0	0	0	0	0	0	0	0	0	0	0	0	0
Ac_ciRNA_01334	0	0	0	0	0	0	0	0	0	0	0.446732	0	0	0	0	0	0	0	0	0.843104	0	0.927969	0.638346	0.799021	0	0	0	0	0	0
Ac_ciRNA_01335	0	0	0	0	0	0	0	0	0	0	0	0	0	0	0	0	0	0	0.269403	0.658032	0.0643938	0.383292	0.191504	0.399511	0	0	0	0	0	0
Ac_ciRNA_01341	0	0	0	0	0	0	0.0605422	0	0.0423501	0.10631	0	0	0.128435	0	0.0886281	0.067293	0.0613408	0.0840339	0	0	0	0	0	0	0	0	0	0	0	0
Ac_ciRNA_01352	0	0	0	0	0	0	0	0	0	0	0	0	0	0.0842667	0	0.112155	0.0613408	0.042017	0	0	0	0	0	0	0	0	0	0	0	0
Ac_ciRNA_01354	0	0	0	0	0	0	0	0.0587955	0.105875	0.0637858	0.0388462	0.0607031	0	0	0	0	0	0	0	0	0	0	0	0	0	0	0	0	0	0
Ac_ciRNA_01387	0	0.0676482	0	0	0	0	0	0	0	0	0	0	0	0	0	0	0	0	0	0	0	0	0	0	0	0	0	0	0.0377743	0.104719
Ac_ciRNA_01388	0	0	0	0	0	0	0	0	0	0	0.0971156	0	0	0	0	0	0	0	0	0.102818	0.107323	0.080693	0.0851128	0	0	0	0	0	0	0
Ac_ciRNA_01404	0	0	0	0	0	0	0	0.117591	0.12705	0.0637858	0	0.0607031	0	0	0	0	0	0	0	0	0	0	0	0	0	0	0	0	0	0
Ac_ciRNA_01413	0.0841968	0.0901976	0.177208	0.159657	0.0627206	0.179153	0.0605422	0	0	0	0	0	0	0	0	0	0	0	0	0	0	0	0	0	0.287817	0.149336	0.0788881	0.408175	0	0.125663
Ac_ciRNA_01424	0.0841968	0	0	0	0	0	0	0	0	0	0	0	0.321087	0.147467	0.59824	0	0	0.462187	0.12434	0	0.193181	0.0403465	0	0.110975	0	0	0	0	0	0
Ac_ciRNA_01431	0	0	0	0	0	0	0	0	0	0	0	0	0.0642175	0.0421334	0.0886281	0.089724	0.0817877	0	0	0	0	0	0	0	0	0	0	0	0	0
Ac_ciRNA_01432	0	0	0	0	0	0	0	0	0	0	0	0	0	0	0	0	0	0	0.0828932	0.123381	0	0.0403465	0.0425564	0.0665851	0	0	0	0	0	0
Ac_ciRNA_01433	0	0.0450988	0.0393795	0	0	0	0	0	0	0	0	0	0	0	0	0	0	0	0	0	0	0	0	0	0.0664193	0.0853346	0.0986101	0.236312	0.0944357	0.188495
Ac_ciRNA_01434	0	0	0	0	0	0	0	0	0	0	0	0	0	0	0	0	0	0	0	0	0	0	0	0	0	0	0.059166	0.0429658	0	0
Ac_ciRNA_01435	0	0	0	0	0	0	0	0	0	0	0	0	0.899045	0.779467	0	0	0.572514	0.777314	0	0	0	0	0	0	0	0	0	0	0	0
Ac_ciRNA_01442	0	0	0	0	0	0	0	0	0	0	0.0388462	0	0	0	0	0	0	0	0.0414466	0	0	0.0403465	0.0425564	0.0443901	0	0	0	0	0	0
Ac_ciRNA_01445	0	0	0	0	0	0	0	0	0	0	0	0	0	0	0	0	0	0	0.24868	0.390707	0	0.201732	0.212782	0	0	0	0	0	0	0
Ac_ciRNA_01447	0	0	0	0	0	0	0	0	0	0	0	0	0	0	0	0	0	0	0.145063	0	0	0	0.106391	0.0665851	0	0	0	0	0	0
Ac_ciRNA_01452	1.07351	1.53336	0.157518	0.957939	1.17078	0	0	0	0.698777	0	0	0	0.51374	0.632001	0.288041	0.560775	0.511173	0.336136	0	0	0	0.080693	0	0.0887801	0	0	0.926935	2.3846	0	0.64926
Ac_ciRNA_01455	0	0	0.196897	0	0	0	0	0	0	0.340191	0	1.03195	0	0.4424	0.199413	0.157017	0.286257	0.567229	0	0	0	0	0	0	0	0	0	0	0	0.607372
Ac_ciRNA_01457	0	0	0	0	0	0	0	0	0	0	0	0	0	0	0.398826	0.381327	0.695196	0.27311	0	0	0	0	0	0	0	0	0	0	0	0
Ac_ciRNA_01459	0.799869	1.08237	0.196897	0.558798	0.376324	1.692	0.383434	0	0.804652	0.722905	0	0	0.684987	0	0	0.695361	0.961006	0	0	0	0	0	0	0	0	0	0.966379	2.08384	0.169984	0.37699
Ac_ciRNA_01466	0.0631476	0.0676482	0	0	0.0836275	0.119436	0	0	0	0	0	0.0404687	0	0	0	0	0	0	0	0	0	0	0	0	0.110699	0.064001	0	0.0644487	0	0
Ac_ciRNA_01467	0	0	0	0	0	0	0	0.274379	0	0	0	0	0	0	0.199413	0.426189	0	0.189076	0	0	0	0	0	0	0	0	0	0	0.13221	0
Ac_ciRNA_01471	0	0	0	0	0	0	0	0	0	0	0	0	0	0	0	0	0	0	0	0	0.0858584	0.0403465	0	0	0	0	0	0	0	0
Ac_ciRNA_01474	0	0	0.354415	0	0	0	0	1.92065	0	2.33881	0	0	2.31183	1.98027	1.48452	2.602	2.3514	1.47059	0	0.143945	0.193181	0.0605197	0	0.110975	0	0	0	0	0	0
Ac_ciRNA_01478	0	0	0	0	0	0	0	0	0	0	0	0	0.0642175	0	0.0443141	0	0.0408939	0.042017	0	0	0	0	0	0	0	0	0	0	0	0
Ac_ciRNA_01483	0	0	0	0	0	0	0.080723	0	0	0	0	0	0	0	0	0	0.0817877	0.042017	0	0	0	0	0	0	0.0664193	0.0853346	0.276108	0.0644487	0	0.0837755
Ac_ciRNA_01489	0	0	0	0	0	0	0	0	0	0	0	0	0.321087	0.105333	0	0.134586	0	0.126051	0	0	0	0	0	0	0	0	0	0	0	0
Ac_ciRNA_01492	0	0	0	0	0	0	0	0	0	0	0	0	0.128435	0.0632001	0.0886281	0	0	0.0840339	0	0	0	0	0	0	0	0	0	0	0	0
Ac_ciRNA_01493	0	0	0	0	0	0	0	0	0	0	0	0	0.0642175	0.0421334	0.0443141	0.044862	0	0.0630255	0	0	0	0	0	0	0	0	0	0	0	0
Ac_ciRNA_01495	0	0	0	0	0.0836275	0.0796238	0	0	0	0	0	0	0	0	0	0	0	0	0	0	0	0	0	0	0	0	0	0	0	0
Ac_ciRNA_01498	0	0	0	0	0	0	0	0	0	0	0	0	0.0856233	0.105333	0	0	0	0	0	0	0	0	0	0	0	0	0	0	0	0
Ac_ciRNA_01508	0	0	0	0	0	0	0	0.078394	0	0	0	0.161875	0.0856233	0.294934	0.310198	0	0.224916	0.27311	0	0	0.0643938	0	0.0425564	0	0	0	0	0	0	0
Ac_ciRNA_01509	0	0.0450988	0.078759	0	0.0836275	0.0597178	0	0.117591	0.0847003	0	0.0388462	0.182109	0.470928	0.273867	0.354512	0.493482	0.368045	0.42017	0	0.041127	0.0429292	0.0605197	0.0425564	0.0443901	0	0.0426673	0	0	0	0
Ac_ciRNA_01514	0	0	0	0	0	0	0	0.470364	0.825827	0.659119	1.32077	0	1.24154	0.632001	1.50668	2.08608	1.77888	1.84875	0.994719	4.60623	1.24495	1.75507	1.8512	1.88658	0	0	0	0	0	0
Ac_ciRNA_01516	0	0	0	0	0	0	0	0	0	0	0	0	0	0	0	0	0	0	0	0	0	0	0	0	0.0664193	0.128002	0	0	0	0
Ac_ciRNA_01525	0.0631476	0.180395	0.0393795	0	0.0836275	0.0995297	0	0.078394	0	0.0425238	0	0	0	0	0	0	0	0	0	0	0	0	0	0	0.0442795	0	0.0788881	0.214829	0	0
Ac_ciRNA_01530	0	0.0676482	0	0	0	0	0.0403615	0.039197	0.0423501	0.10631	0	0	0.0428117	0	0.0443141	0	0.0408939	0	0	0	0	0	0	0	0	0.0853346	0.059166	0.0859316	0.0566614	0.0628316
Ac_ciRNA_01531	0	0	0	0	0	0.0398119	0	0	0	0	0	0	0	0	0	0	0	0	0	0	0	0	0	0	0	0	0.0788881	0.15038	0	0
Ac_ciRNA_01534	0	0	0	0	0	0	0	0	0.0423501	0.0637858	0	0	0	0	0	0	0	0	0	0	0	0	0	0	0	0	0	0	0	0
Ac_ciRNA_01544	0	0	0	0	0	0	0	0	0	0	0	0	0.0856233	0.0421334	0.0664711	0	0	0.0630255	0	0	0	0	0	0	0	0	0	0	0	0
Ac_ciRNA_01547	0	0	0	0	0	0	0	0.13719	0.465851	1.27572	0	0.971249	0.278276	0.1896	0.177256	0.942102	0.592961	0.147059	0	0	0	0	0	0	0	0	0	0	0.0566614	0
Ac_ciRNA_01554	0	0	0	0	0	0	0	0	0	0	0	0	0	0	0.0886281	0.044862	0	0	0	0	0	0	0	0	0	0	0	0	0	0
Ac_ciRNA_01558	0	0	0	0	0	0.0796238	0.121084	0	0	0	0	0.0607031	0	0	0	0	0	0	0	0	0	0	0	0	0	0.0426673	0	0	0.0377743	0.0418878
Ac_ciRNA_01563	0	0	0	0	0	0	0	0	0	0	0	0	0	0	0	0	0	0	0.0828932	0.0616905	0	0	0	0	0	0	0	0	0	0
Ac_ciRNA_01564	0	0.180395	0	0	0	0	0	0	0	0	0.271924	0	0	0	0	0	0	0	0.24868	0	0.407828	0.262252	0.319173	0	0	0.106668	0	0	0.0377743	0
Ac_ciRNA_01568	0.505181	0.608834	0	0.399141	0.229976	0.557366	1.13012	0	0	0.0425238	0.0971156	0.0809374	0.107029	0.0842667	0.132942	0.246741	0.102235	0.168068	0.165786	0.226199	0.128788	0.201732	0.0851128	0.0887801	1.85974	2.1547	0.631104	2.59943	0.169984	2.0525
Ac_ciRNA_01569	0.736722	1.28532	0.472554	0.259442	0.439044	0.477743	2.30061	0.235182	0.465851	0.170095	0	0.647499	0	0	0	0	0	0	0	0	0	0	0	0	0.376376	0.256004	0	0.0429658	0.604388	0.586429
Ac_ciRNA_01572	0	0.36079	0.0984487	0.0598712	0.104534	0.159248	0	0.078394	0.317626	0	0.369039	0	0	0	0	0	0	0	0	0.041127	0	0	0	0	0.199258	0	0	0	0	0.230383
Ac_ciRNA_01584	0	0	0	0	0	0	0.0605422	0.156788	0	0	0	0.0404687	0	0	0	0	0	0	0	0	0	0	0	0	0	0.170669	0	0.257795	0.39663	0.565485
Ac_ciRNA_01585	0	0	0	0	0	0	0.0605422	0	0	0	0.0776925	0.0607031	0	0	0	0	0	0	0	0	0	0	0	0	0	0	0	0.51559	0.321081	1.1938
Ac_ciRNA_01592	0	0	0	0	0	0	0	0	0	0	0	0	0	0	0	0	0.0408939	0.105042	0	0	0	0	0	0	0	0	0.276108	0	0.226646	0.733036
Ac_ciRNA_01593	0	0	0	0	0	0	0	0	0	0	0	0	0	0	0	0	0	0	0	0	0	0	0.127669	0.0665851	0	0.064001	0	0.279278	0	0
Ac_ciRNA_01597	0	0	0	0	0.0418137	0	0	0	0	0	0	0	0	0	0	0	0.0408939	0	0	0	0	0	0	0	0	0	0	0	0.207759	0.188495
Ac_ciRNA_01598	0	0	0.0590692	0	0	0	0.100904	0.372372	0	0.0850477	0	0	0	0	0	0	0.0817877	0	0	0	0	0	0	0	0.154978	0.0853346	0.0986101	0	0	0.523597
Ac_ciRNA_01605	0	0	0	0	0	0	0.0403615	0.078394	0.0423501	0.0425238	0	0	0	0	0	0	0	0	0	0	0	0	0	0	0	0.064001	0	0	0	0
Ac_ciRNA_01608	0	0	0	0	0	0	0	0	0	0	0.0776925	0	0	0	0	0	0	0	0	0.041127	0	0	0.255338	0.110975	0	0	0	0	0	0
Ac_ciRNA_01613	0	0	0	0.0399141	0.0627206	0.0398119	0	0	0	0	0	0	0	0	0	0	0	0	0	0	0	0	0	0	0.0442795	0.0426673	0.0986101	0.0644487	0	0.0418878
Ac_ciRNA_01614	0	0	0	0.0598712	0	0.119436	0.221988	0	0	0	0	0	0	0	0	0	0	0	0	0	0	0	0	0	0.088559	0.0426673	0.138054	0.171863	0.0566614	0.104719
Ac_ciRNA_01617	0	0.112747	0	0.0798283	0.250882	0.119436	0.080723	0	0	0	0	0.14164	0	0	0	0	0	0	0	0	0	0	0	0	0	0	0	0	0	0
Ac_ciRNA_01618	0	0	0	0	0	0	0	0.254781	0.0423501	0.0425238	0	0.161875	0	0	0	0	0	0	0	0	0	0	0	0	0	0	0	0	0	0
Ac_ciRNA_01626	0	0	0	0	0	0	0	0	0	0	0	0	0.663581	0.674134	0.398826	0.717792	0.695196	0.42017	0	0	0	0	0	0	0	0	0	0	0	0
Ac_ciRNA_01629	0	0	0	0	0	0	0	0	0	0	0	0	0	0	0	0	0	0	0.0828932	0.226199	0.150252	0.181559	0.23406	0.26634	0	0	0	0	0	0
Ac_ciRNA_01634	0	0	0	0	0	0	0	0	0	0	0	0	0	0	0	0	0	0	0	0	0	0	0.0425564	0.0887801	0	0	0	0	0	0
Ac_ciRNA_01644	0	0	0	0	0	0	0	0	0	0	0	0	0.0856233	0.105333	0.0664711	0.089724	0.0817877	0	0	0	0	0	0	0	0	0	0	0	0	0
Ac_ciRNA_01669	0	0	0	0	0	0	0	0	0	0	0	0	0	0	0	0	0	0	0	0	0.107323	0.121039	0	0	0	0	0	0	0	0
Ac_ciRNA_01672	0	0	0	0	0	0	0	0	0	0	0	0	0	0	0	0	0	0	0.37302	0.863668	0.579544	0.766583	0.553233	0.488291	0	0	0	0	0	0
Ac_ciRNA_01685	0	0.0450988	0.0393795	0	0	0	0.0403615	0	0	0	0	0	0	0	0	0	0	0	0	0	0	0	0	0	0.088559	0.0426673	0.157776	0.15038	0.169984	0.146607
Ac_ciRNA_01686	0	0.0450988	0	0.0399141	0	0	0.0403615	0	0	0	0	0	0	0	0	0	0	0	0	0	0	0	0	0	0.0442795	0	0.039444	0.0859316	0.0755486	0
Ac_ciRNA_01688	1.49449	1.03727	0.177208	1.23734	1.00353	0.119436	0.928314	0.862334	0.254101	0.0850477	0.330193	2.95422	0	0	0	0	2.16738	0.042017	0.227956	0.596342	0	0.080693	0.46812	0.0443901	0	0	0	0	0.0566614	0
Ac_ciRNA_01694	0	0	0	0	0	0	0	0	0	0	0	0	0.321087	0.526667	0.155099	0	0	0	0	0	0	0.0605197	0	0	0	0.128002	0	0	0	0
Ac_ciRNA_01695	0	0	0	0	0	0	0	0	0	0	0.505001	0.14164	0	0	0	0	0	0	0.37302	0.596342	1.0303	0.80693	0.404286	0.532681	0	0	0	0	0	0
Ac_ciRNA_01699	0.652525	0.541185	0.72852	0.419098	0.627206	0.955485	0.80723	0	0	0	0	0	0	0	0	0	0	0	0	0	0	0	0	0	1.30625	0.682677	1.06499	0.644487	0.245533	0.314158
Ac_ciRNA_01702	0	0	0	0	0	0	0	0.470364	0.635252	0	0	0.728437	1.36997	0	0.952752	0.986965	0	0.609246	0	0	0	0	0	0	0	0	0	0	0	0
Ac_ciRNA_01703	0	0	0	0	0	0	0	0	0	0	0	0	0.0856233	0.0842667	0.110785	0.112155	0.0613408	0.126051	0	0	0	0	0	0	0	0	0	0	0	0
Ac_ciRNA_01705	0	0	0	0	0	0	0	0	0	0	0	0	0	0	0.0664711	0.089724	0	0	0	0	0	0	0	0	0	0	0	0	0	0
Ac_ciRNA_01716	0	0	0	0	0.0418137	0.0597178	0	0	0	0	0	0	0	0	0	0	0	0	0	0	0	0	0	0	0.332096	0.192003	0	0	0	0
Ac_ciRNA_01717	0	0.0450988	0.0393795	0.0399141	0	0	0.0403615	0.13719	0.148225	0	0	0	0	0	0	0	0	0	0	0	0	0	0	0	0	0.128002	0.059166	0.236312	0.169984	0.0418878
Ac_ciRNA_01719	0	0	0.118138	0	0	0.338401	0	0	0.0847003	0.127572	0	0	0	0	0	0	0	0	0	0	0	0	0	0	0.110699	0	0	0	0.245533	0
Ac_ciRNA_01721	0.0841968	0	0	0	0	0	0	0	0	0	0	0.0607031	0	0	0	0	0	0	0	0	0	0	0	0	0.0664193	0.0426673	0	0	0	0
Ac_ciRNA_01722	0	0	0	0	0.0418137	0.0995297	0	0	0	0	0	0	0	0	0	0	0	0	0	0	0	0	0	0	0	0	0	0	0	0
Ac_ciRNA_01724	0	0	0	0	0	0	0	0	0	0	0	0	0	0	0	0	0.102235	0.042017	0	0	0	0	0	0	0	0	0	0	0	0
Ac_ciRNA_01726	0	0	0	0	0	0	0	0	0	0	0	0	0.107029	0.0842667	0.310198	0.22431	0.449833	0.168068	0	0	0	0	0	0	0	0	0	0	0	0
Ac_ciRNA_01742	0.0420984	0.0676482	0	0.0598712	0	0.0597178	0.0403615	0	0	0.0425238	0	0.0607031	0.107029	0.105333	0.0886281	0.112155	0.0613408	0.0630255	0	0	0	0	0	0	0.110699	0.064001	0	0	0	0
Ac_ciRNA_01744	0	0	0	0	0	0	0	0	0	0	0	0	0	0.358134	0.354512	0.381327	0.592961	0.252102	0.12434	0.246762	0.193181	0.282425	0.212782	0.244145	0	0	0	0	0	0
Ac_ciRNA_01750	0	0	0	0	0	0	0	0	0	0	0	0	0.0428117	0.0842667	0	0	0	0	0	0	0	0	0	0	0	0	0	0	0	0
Ac_ciRNA_01751	0.0420984	0.0901976	0.118138	0.0399141	0.0418137	0	0	0	0	0	0	0	0	0	0	0	0	0	0	0	0	0	0	0	0	0.064001	0	0	0	0
Ac_ciRNA_01759	0	0	0	0	0	0	0	0	0	0	0	0	0.25687	0	0.177256	0.157017	0	0	0	0	0	0	0	0	0	0	0	0	0	0
Ac_ciRNA_01764	0.0631476	0.135296	0	0	0	0	0	0	0	0	0	0	0	0	0	0	0	0	0	0	0	0	0	0	0	0	0	0	0	0
Ac_ciRNA_01765	0	0	0.196897	0	0.229976	0.358307	0	0.293978	0.169401	0.318929	0	0.526093	0	0	0	0	0	0	0	0	0	0	0	0	0	0	0	1.11711	0	0.565485
Ac_ciRNA_01780	0.105246	0.157846	0	0.179614	0.355417	0.378213	0	0	0	0	0	0	0	0	0	0	0	0	0	0	0	0	0	0	0.509214	0.490674	0	0.257795	0	0.397934
Ac_ciRNA_01783	0.0631476	0.0901976	0.0393795	0.0798283	0.167255	0	0	0	0	0.0850477	0	0	0	0.147467	0.177256	0	0.143129	0.0840339	0	0.308453	0	0.201732	0	0.22195	0	0.0426673	1.59748	1.16008	0	0
Ac_ciRNA_01796	0	0.0676482	0	0	0	0	0	0	0	0	0	0	0	0	0.0886281	0.067293	0	0	0	0	0	0	0	0	0	0	0	0	0	0
Ac_ciRNA_01798	0	0	0	0	0	0	0	0	0	0	0	0	0	0	0	0	0	0	0	0.226199	0.0643938	0	0.319173	0.13317	0	0	0	0	0	0
Ac_ciRNA_01800	0.168394	0.36079	0.177208	0.319313	0	0.298589	0.443976	0.195985	0.317626	0	0.213654	0.505859	0.278276	0.1896	0.59824	0	1.16548	1.09244	0	0	0	0	0	0	0	0.789345	0.828325	0.343726	0.812147	0.544541
Ac_ciRNA_01801	0	0	0	0	0	0.398119	0	0	0	0	0	0	0	0.147467	0.22157	0.179448	0	0.483195	0	0.76085	0.300505	0	0.148947	0.13317	0	0	0	0	0	0
Ac_ciRNA_01804	0	0	0	0	0	0	0	0	0	0.170095	0	0	0.171247	0	0.709025	0	0	0	0	0	0	0.201732	0.361729	0.355121	0	0	0	0	0	0
Ac_ciRNA_01806	0	0	0	0	0	0	0	0	0	0	0.505001	0	0.214058	0.147467	0.509612	0.112155	1.08369	0.861348	0.663146	2.48819	0	0.585024	1.04263	0.355121	0	0	0	0	0	0
Ac_ciRNA_01811	0	0	0	0	0	0	0	0	0	0	0	0	0	0	0	0	0	0	0.207233	2.24142	0.729797	0.342945	0.46812	0.621461	0	0	0	0	0	0
Ac_ciRNA_01819	0	0	0	0	0	0	0	0	0	0	0	0	0.577957	0.210667	0.709025	0.538344	1.84022	1.30253	0	0	0	0	0	0	0	0	0	0	0	0
Ac_ciRNA_01823	0	0	0	0	0	0	0	0	0	0.233881	0.446732	0	0.385305	0.1896	0.709025	0.67293	1.41084	1.17648	0.269403	1.99466	0.729797	0.544678	0.404286	0.377316	0	0	0	0	0	0
Ac_ciRNA_01826	0.0841968	0.338241	0	0	0.104534	0.318495	0	0	0.423501	0.233881	0.116539	0	0	0.316	0	0	0	0	0	0	0	0	0	0	0	0	0	0	0	0
Ac_ciRNA_01828	0	0.157846	0	0	0.0836275	0.159248	0.181627	0.215584	0	0.212619	0.194231	0.263047	0	0	0	0	0.102235	0	0	0	0	0	0	0.199755	0	0	0	0	0	0
Ac_ciRNA_01832	0	0	0	0	0	0	0	0	0	0	0	0	0	0	0	0	0	0	0.455913	0.863668	0	0.423638	0.680902	0.621461	0	0	0	0	0	0
Ac_ciRNA_01833	0	0	0	0	0	0	0	0	0	0	0	0	0	0	0	0	0	0	0.269403	0.34958	0	0	0.446842	0.488291	0	0	0	0	0	0
Ac_ciRNA_01836	0	0	0	0	0	0	0	0	0	0	0.602117	0	0.792016	0.737334	0.620397	0.583206	0	0.69328	0.227956	0.514088	0.343434	0.242079	0.489399	0.26634	0	0	0	0	0	0
Ac_ciRNA_01840	0	0	0	0	0	0	0	0	0	0	0	0	0.214058	0	0	0	0	0	0.18651	0.329016	0	0	0.425564	0.488291	0	0	0	0	0	0
Ac_ciRNA_01842	0	0	0	0	0	0	0	0	0.0423501	0	0	0	0	0	0	0	0.0408939	0	0.0414466	0	0	0	0	0	0	0	0.118332	0.0644487	0	0
Ac_ciRNA_01843	0	0	0	0	0	0	0	0	0	0	0.369039	0	0	0	0	0	0	0	0.891102	0.637469	0.579544	0.665717	0.893684	0.510486	0	0	0	0	0	0
Ac_ciRNA_01844	0	0	0	0	0	0	0	0	0	0	0.0776925	0	0	0	0	0	0	0	0.24868	0.34958	0.107323	0.121039	0.191504	0.17756	0	0	0	0	0	0
Ac_ciRNA_01845	0	0	0	0	0	0	0	0	0	0	0.0582694	0	0	0	0	0	0	0	0.165786	0.0616905	0.0858584	0.121039	0.106391	0.0443901	0	0	0	0	0	0
Ac_ciRNA_01848	0	0	0	0.0997853	0	0.179153	0	0.313576	0.0847003	0.0637858	0	0	0	0	0	0.201879	0	0	0.31085	0	0.27904	0	0.23406	0	0	0	0	0	0	0
Ac_ciRNA_01851	0	0	0	0	0	0	0	0	0	0	0	0	0	0	0	0	0	0	0	0	0.257575	0.0605197	0.0425564	0	0	0	0	0	0	0
Ac_ciRNA_01862	0	0	0	0	0	0	0	0	0	0	0	0	0.363899	0.1896	0.155099	0.157017	0.184022	0.315127	0	0	0	0	0	0	0	0	0	0	0	0
Ac_ciRNA_01864	0	0	0	0	0	0	0	0	0	0	0	0	0	0	0	0	0.0408939	0.0630255	0	0	0	0	0	0	0	0	0	0	0	0
Ac_ciRNA_01865	0	0	0	0	0	0	0	0.235182	0.254101	0.255143	0.0582694	0.384453	0	0	0	0	0	0	0	0	0	0	0	0	0	0	0	0	0	0
Ac_ciRNA_01868	0	0	0.0393795	0	0	0	0.100904	0	0	0.0637858	0	0	0.149841	0.1264	0	0.157017	0.102235	0.294119	0	0	0	0	0	0.0443901	0.199258	0.192003	0.19722	0	0	0.0837755
Ac_ciRNA_01870	0	0	0	0	0	0	0	0	0	0	0.0388462	0	0	0	0	0	0	0	0.103617	0.123381	0.0643938	0.0403465	0	0	0	0	0	0	0	0
Ac_ciRNA_01879	0	0	0	0	0	0	0	0	0	0	0	0	0.25687	0.421334	0	0.179448	0.143129	0	0	0	0	0	0	0	0	0	0.059166	0	0	0
Ac_ciRNA_01881	0	0	0	0	0	0	0	0.0979925	0.12705	0.170095	0.0582694	0.0809374	0	0	0	0	0	0	0	0	0	0	0	0	0	0	0	0	0	0
Ac_ciRNA_01882	0	0	0	0	0	0	0	0.0587955	0.148225	0.0425238	0	0.0404687	0	0	0	0	0	0	0	0	0	0	0	0	0	0	0	0	0	0
Ac_ciRNA_01883	0	0	0	0	0	0	0	0.039197	0.12705	0.0425238	0	0.0607031	0	0	0	0	0	0	0	0	0	0	0	0	0	0	0	0	0	0
Ac_ciRNA_01889	0	0	0	0	0	0	0	0	0	0	0	0	0.278276	0	0.376669	0.493482	0.899665	0.27311	0.0414466	0	0	0	0.106391	0	0	0	0	0	0	0
Ac_ciRNA_01890	0	0	0	0	0	0	0	0.509561	0.592902	0.4465	0.174808	0.242812	0	0	0	0	0	0	0	0	0	0	0	0	0	0	0	0	0	0
Ac_ciRNA_01894	0	0.428438	0.118138	0	0	0	0	0	0	0	0	0	0	0	0	0	0	0	0	0	0	0	0	0	0.0442795	0.106668	0	0	0	0
Ac_ciRNA_01895	0	0	0	0	0	0	0	0	0	0	0	0	0.706392	0.547734	0	0	0	0	0	0	0	0	0	0	0	0	0	0	0	0
Ac_ciRNA_01896	0	0	0	0	0	0	0	0	0	0	0	0	0	0	0.797653	0	2.10603	0.504204	0	0	0	0	0	0	0	0	0	0	0	0
Ac_ciRNA_01900	0	0	0	0	0	0	1.00904	0	0.169401	0.148833	0	0.0404687	0	0	0	0	0	0	0	0	0	0	0	0	0	0	0	0	0	0
Ac_ciRNA_01903	0	0	0	0	0	0	0	0.39197	0.465851	0.55281	0.0582694	0	0	0	0	0	0	0	0	0	0	0	0	0	0	0	0	0	0	0
Ac_ciRNA_01906	0.589377	1.37551	1.16169	0.758369	0.731741	1.97069	0	0	0	0	0	0	0.0642175	0	0.110785	0.089724	0.102235	0	0	0	0	0	0	0.288535	0.575634	0.554675	0	0.945247	0.207759	1.1938
Ac_ciRNA_01908	0.0631476	0	0.315036	0.0997853	0	0	0	0	0	0.233881	0	0.101172	0	0	0	0	0	0	0	0	0	0	0	0	0	0	0	0	0	0
Ac_ciRNA_01911	0	0	0	0	0	0	0	0	0	0	0	0	0.0856233	0.0632001	0	0	0	0	0	0	0	0	0	0	0	0	0	0	0	0
Ac_ciRNA_01916	0	0	0	0.0598712	0	0	0	0	0	0	0	0	0	0	0	0	0	0	0	0	0	0	0	0	0	0.0853346	0.29583	0.0429658	0.113323	0
Ac_ciRNA_01917	0	0	0	0	0	0	0.0403615	0.0587955	0	0	0	0	0	0	0	0	0	0	0	0	0	0	0	0	0	0	0	0	0	0
Ac_ciRNA_01918	0	0	0	0	0	0	0	0	0	0	0	0	0	0	0	0.044862	0.0408939	0.042017	0	0	0	0	0	0	0	0	0	0	0	0
Ac_ciRNA_01919	0	0	0.0393795	0	0	0	0	0	0	0	0.0388462	0	0	0	0	0	0	0	0	0	0	0	0	0	0.0442795	0.192003	0	0.107414	0	0
Ac_ciRNA_01923	0	0	0	0	0	0	0	0	0	0	0	0	0.0428117	0.0632001	0.0664711	0.044862	0.0817877	0	0	0	0	0	0	0	0	0	0	0	0	0
Ac_ciRNA_01925	0.0631476	0.0901976	0.0590692	0	0	0.0597178	0	0	0	0	0	0	0	0	0	0	0	0	0	0	0	0	0	0	0.0664193	0.106668	0.335274	0.257795	0.188871	0.188495
Ac_ciRNA_01931	0	0	0	0	0	0	0	0	0	0	0	0	0.0856233	0.0421334	0	0	0.0817877	0	0	0	0	0	0	0	0	0	0	0	0	0
Ac_ciRNA_01934	0	0	0	0	0	0	0	0	0.635252	0	0.485578	0	0	0	0	0	0	0	0.476636	0	0.407828	0.524504	0.446842	0.643656	0	0	0	0	0	0
Ac_ciRNA_01936	0.168394	0.0450988	0.0590692	0.0997853	0.0418137	0.139342	0.080723	0.13719	0.0423501	0.127572	0.0388462	0	0.299682	0.168533	0.243727	0.314034	0.184022	0.315127	0	0	0	0	0	0	0.332096	0.533341	0.867769	0.902282	0.944357	1.48702
Ac_ciRNA_01939	0	0.0450988	0	0	0	0.0398119	0.0605422	0	0	0	0.116539	0	0	0.0421334	0	0	0	0	0.0621699	0.0822541	0.0858584	0.080693	0.127669	0	0	0	0.177498	0.0644487	0.0755486	0.0837755
Ac_ciRNA_01940	0.0841968	0	0	0	0.0627206	0.0398119	0.0605422	0.117591	0.0847003	0.255143	0	0.222578	0	0	0	0	0	0	0	0	0	0	0	0	0.132839	0.064001	0.216942	0.15038	0.0566614	0.0837755
Ac_ciRNA_01943	0.0631476	0	0	0	0	0.0597178	0.26235	0.117591	0.0847003	0.0850477	0.0776925	0.303515	0.107029	0.168533	0.110785	0.134586	0.224916	0.147059	0	0	0	0	0	0	0.0442795	0	0	0.0859316	0.0377743	0.0418878
Ac_ciRNA_01955	0	0	0	0	0	0	0.080723	0.0979925	0.0423501	0	0.0388462	0.0404687	0	0.0421334	0	0	0	0	0	0	0	0	0	0	0	0.064001	0.0986101	0.0644487	0	0
Ac_ciRNA_01956	0	0	0	0	0	0	0	0	0.0423501	0	0	0	0	0.0632001	0	0	0.0817877	0.042017	0	0	0	0	0	0	0	0	0	0	0	0
Ac_ciRNA_01962	0.0631476	0	0	0.0399141	0	0.0398119	0.080723	0	0	0.0425238	0.0388462	0.0404687	0	0	0.0443141	0.044862	0.0817877	0	0	0	0	0	0	0	0.221398	0.192003	0.39444	0.15038	0.0755486	0.293214
Ac_ciRNA_01966	0	0	0	0	0	0	0	0	0	0	0	0	0	0	0	0	0	0	0	0	0	0	0	0	0	0	0.0986101	0.0644487	0	0
Ac_ciRNA_01967	0	0	0	0	0	0	0	0	0	0	0	0	0	0	0	0	0	0	0	0	0	0	0	0	0	0	0	0	0.151097	0.167551
Ac_ciRNA_01970	0.126295	0	0	0.139699	0.104534	0.298589	0	0	0.105875	0	0	0.14164	0	0	0	0	0	0	0.227956	0	0	0	0.0638346	0	0.642053	0.426673	0.29583	0.236312	0.491066	0.314158
Ac_ciRNA_01972	0	0	0	0	0	0	0	0	0	0	0	0	0.0428117	0.0421334	0	0	0	0	0	0	0	0	0	0	0	0	0	0	0	0
Ac_ciRNA_01980	0	0	0	0	0	0	0	0	0	0	0.155385	0	0	0	0	0	0	0	0.0828932	0.267326	0.0429292	0.080693	0	0.13317	0	0	0	0	0	0
Ac_ciRNA_01982	0.210492	0.135296	0	0	0.209069	0.159248	0.141265	0.156788	0	0.0850477	0	0.161875	0	0	0	0	0	0	0	0	0	0	0	0	0.464935	0.320005	0.236664	0.0644487	0.188871	0.146607
Ac_ciRNA_01986	0.0420984	0.0676482	0	0	0	0	0	0	0	0	0	0	0	0	0	0	0	0	0	0	0	0	0	0	0	0	0	0	0	0
Ac_ciRNA_02013	0	0	0	0	0	0	0	0.078394	0.105875	0.0637858	0	0.101172	0	0	0	0	0	0	0	0	0	0	0	0	0	0	0	0	0	0
Ac_ciRNA_02014	0	0	0	0	0.0418137	0.0398119	0	0	0	0	0	0	0	0	0	0	0	0	0	0	0	0	0	0	0	0.064001	0.118332	0.107414	0.0377743	0.0418878
Ac_ciRNA_02016	0	0	0	0	0	0	0	0	0	0	0.0388462	0	0	0	0	0	0	0	0.103617	0.0616905	0	0	0	0.0443901	0	0	0	0	0	0
Ac_ciRNA_02022	0	0	0	0	0	0	0	0	0	0	0	0	0.0428117	0.0632001	0.0443141	0.067293	0.0613408	0.126051	0	0	0	0	0	0	0	0	0	0	0	0
Ac_ciRNA_02028	0	0	0	0	0	0	0	0	0	0	0	0	0	0	0	0	0	0	0	0	0	0.080693	0.0425564	0.155365	0	0	0	0	0	0
Ac_ciRNA_02029	0	0	0	0	0	0	0	0	0	0	0	0	0.385305	0.337067	0.110785	0.22431	0.102235	0.210085	0	0	0	0	0	0	0	0	0	0	0	0
Ac_ciRNA_02030	0	0	0	0	0	0	0	0	0	0	0	0	1.66965	1.85387	0.997066	0.762654	0	1.32353	0	0	0	0	0.212782	0.577071	0	0	0	0	0	0
Ac_ciRNA_02031	0	0	0	0	0	0	0	0.039197	0.148225	0.10631	0	0.121406	0	0	0	0	0	0	0.103617	0	0	0	0	0.843411	0	0	0	0	0	0
Ac_ciRNA_02032	0	0	0	0	0	0	0.080723	0	0	0	0.0388462	0	0	0	0.0443141	0	0	0	0	0	0	0.0403465	0	0	0.0664193	0.064001	0	0	0	0
Ac_ciRNA_02034	0	0	0	0	0	0	0	0	0	0	0	0	0	0	0.199413	0.089724	0	0.105042	0	0.041127	0	0	0	0	0	0	0	0	0	0
Ac_ciRNA_02043	0	0	0	0	0	0	0	0	0	0	0	0	0.0642175	0.0421334	0.0443141	0	0	0	0	0	0	0	0	0	0	0	0	0	0	0
Ac_ciRNA_02044	0	0	0	0	0	0	0	0	0	0	0	0	0	0	0.132942	0.067293	0	0	0	0	0	0	0	0	0	0	0	0	0	0
Ac_ciRNA_02048	0	0	0	0	0	0	0	0	0	0	0	0	0	0.0421334	0	0	0	0	0	0	0	0	0	0	0	0	0.0788881	0.0859316	0	0.0837755
Ac_ciRNA_02051	0	0	0.137828	0	0	0	0	0.117591	0	0	0	0	0	0.5688	0.288041	0	0.204469	0.357144	0	0	0	0.121039	0	0.0665851	0	0	0	0	0	0
Ac_ciRNA_02053	0	0	0	0	0	0	0	0	0	0	0	0	0.171247	0.147467	0.0664711	0.044862	0.0817877	0	0	0	0	0	0	0	0	0	0	0	0	0
Ac_ciRNA_02055	0	0	0	0	0	0	0	0	0	0	0	0	0.107029	0.105333	0	0.044862	0.122682	0.0630255	0	0	0	0	0	0	0	0	0	0	0	0
Ac_ciRNA_02056	0	0	0	0	0	0	0	0	0	0	0	0	0.214058	0.0842667	0	0	0	0	0	0	0	0	0	0	0	0	0	0	0	0
Ac_ciRNA_02059	0	0	0	0	0	0	0	0	0	0	0.582694	0	0	0	0	0	0	0	0	0.616905	0.214646	0.282425	0.23406	0.355121	0	0	0.0788881	0.107414	0	0
Ac_ciRNA_02062	0	0	0.255967	0	0	0	0	0.431167	0.232926	0.170095	0	0.263047	0	0	0	0	0	0	0	0	0	0	0	0	0	0	2.11026	0	2.00204	0
Ac_ciRNA_02063	0	0	0	0	0	0	0	0	0	0	0	0	0	0	0	0	0	0	0.0828932	0	0.0429292	0	0.0638346	0.0443901	0	0	0	0	0	0
Ac_ciRNA_02064	0	0	0	0	0	0	0	0	0	0	0	0	0.428117	0.5056	0.420983	0.269172	0.511173	0.504204	0	0	0	0	0	0	0	0	0	0	0	0
Ac_ciRNA_02065	0	0	0	0	0	0	0	0	0	0	0.135962	0	0	0	0	0	0	0	0.0414466	0.143945	0.107323	0.0605197	0.106391	0.199755	0	0	0	0	0	0
Ac_ciRNA_02066	0	0	0.531623	0	0	0	0	0.352773	0	0.55281	0.971156	0.728437	0	1.11653	0.997066	0	0	0	0	0	1.13762	1.06918	0	1.26512	0	0	0	0	0	0
Ac_ciRNA_02069	0	0	0	0	0	0	0	0	0	0	0.116539	0.0809374	0	0	0	0	0	0	0	0	0	0	0	0	0	0	0	0	0	0
Ac_ciRNA_02070	0	0.0450988	0	0	0	0.0796238	0.100904	0	0	0	0	0	0.0428117	0	0	0.089724	0	0	0	0	0	0.0403465	0	0	0.0664193	0	0.039444	0.0429658	0	0
Ac_ciRNA_02072	0	0	0	0	0.188162	0	0	0	0.402326	0.340191	0	0	0	0	0	0	0	0	0	0	0	0	0	0.17756	0	0	0	0	0	0
Ac_ciRNA_02074	0.0631476	0	0	0	0	0	0	0	0	0	0.194231	0	0	0	0	0	0	0	0.145063	0.34958	0.236111	0.181559	0.0638346	0.0665851	0	0	0	0	0	0
Ac_ciRNA_02082	0	0	0	0	0	0	0	0	0	0.148833	0	0.0809374	0.25687	0	0	0.717792	0.674749	0.336136	0	0.472961	0	0.68589	0.425564	0	0	0	0	0	0	0
Ac_ciRNA_02090	0	0	0	0	0	0.0398119	0	0	0	0	0	0	0	0.0421334	0	0.044862	0.0817877	0.0630255	0	0	0	0	0	0.0887801	0	0	0	0	0	0
Ac_ciRNA_02091	0	0	0	0	0	0	0	0	0	0	0.0971156	0	0	0	0	0	0	0	0.0414466	0	0.107323	0	0.0425564	0.0443901	0	0	0	0	0	0
Ac_ciRNA_02092	0	0	0	0	0	0	0	0	0	0	0	0	0	0	0	0	0	0	0.207233	0.246762	0.193181	0.181559	0.255338	0.155365	0	0	0	0	0	0
Ac_ciRNA_02096	0	0	0	0	0	0.0398119	0	0	0	0	0	0	0	0	0	0	0	0	0	0	0	0	0	0	0.088559	0.0853346	0	0	0	0
Ac_ciRNA_02100	0	0	0	0	0	0	0	0	0	0.0425238	0	0	0	0	0	0	0	0	0	0	0	0	0	0	0.199258	0.170669	0	0.15038	0	0.0837755
Ac_ciRNA_02104	0	0	0	0	0	0	0	0	0	0.0637858	0	0	0.171247	0.147467	0.0664711	0.112155	0.122682	0.126051	0	0	0	0	0	0	0	0	0	0	0	0
Ac_ciRNA_02105	0	0	0	0	0	0	0	0	0	0	0	0	0.620769	0.674134	0.354512	0.717792	0.715643	0.630255	0	0	0	0	0	0	0	0	0	0	0	0
Ac_ciRNA_02106	0	0	0	0	0	0	0	0	0.12705	0.0850477	0	0.182109	0	0	0	0.157017	0	0	0	0	0	0	0	0	0	0	0	0	0	0
Ac_ciRNA_02111	0.105246	0.157846	0	0	0	0	0	0	0	0	0	0.0809374	0	0	0	0	0.0408939	0	0	0	0	0	0	0	0	0	0	0	0	0
Ac_ciRNA_02112	0.189443	0.38334	0	0.139699	0.104534	0.159248	0	0	0	0	0	0	0	0	0	0	0	0	0	0	0	0	0	0	0.287817	0.0853346	0	0.494107	0	0.314158
Ac_ciRNA_02113	0	0	0	0	0	0	0	0	0.0635252	0	0	0	0.727798	0.4424	0.620397	0.67293	0.490726	0.252102	0	0	0	0	0	0	0	0	0	0	0	0
Ac_ciRNA_02114	0	0	0	0	0	0	0	0	0	0.0425238	0	0	0	0	0.310198	0	0.224916	0	0	0	0.0643938	0.080693	0	0	0	0	0	0	0	0
Ac_ciRNA_02122	0	0	0	0	0	0	0	0	0	0	0	0	0	0	0	0	0.0817877	0.126051	0	0	0	0	0	0	0	0	0	0	0	0
Ac_ciRNA_02123	0	0	0	0	0	0	0	0	0	0	0	0	0.171247	0.0842667	0.243727	0.044862	0.0613408	0	0	0	0	0	0	0	0	0	0	0	0	0
Ac_ciRNA_02124	0	0	0	0	0	0	0	0	0	0	0	0	1.13451	1.0112	0.997066	1.03183	0.920112	0.861348	0	0	0	0	0	0	0	0	0	0	0	0
Ac_ciRNA_02125	0	0	0	0	0	0	0	0	0.0847003	0	0	0	0.877639	0.779467	0.620397	0.717792	0.981453	0.69328	0	0	0	0	0	0	0	0	0	0	0	0
Ac_ciRNA_02128	0	0	0	0	0	0	0	0	0	0	0	0	0	0	0	0	0	0	0	0	0	0	0	0	0.177118	0.170669	0	0	0	0
Ac_ciRNA_02132	0	0	0	0	0	0	0	0	0	0	0	0	0	0	0	0	0	0	0	0	0	0	0	0	0.0664193	0.149336	0	0	0	0
Ac_ciRNA_02133	0	0	0	0	0	0	0	0	0	0	0	0	0.577957	0.779467	0.775496	0.874809	0.817877	0	0	0	0	0	0	0	0	0	0	0	0	0
Ac_ciRNA_02134	0	0	0	0	0	0	0	0	0	0	0	0	2.03355	0	1.75041	2.08608	1.84022	1.34454	0	0	0	0	0	0	0	0	0	0	0	0
Ac_ciRNA_02140	0	0	0	0	0	0	0	0.333175	0	0	0.291347	2.16508	0	0	0	0	0	0	0	0.041127	0	0	0	0	0	0	0	0	0	0
Ac_ciRNA_02146	0	0	0	0	0	0	0	0	0.0423501	0	0	0	0.342493	0.589867	0.155099	0	0.388492	0.252102	0	0	0	0	0	0	0	0	0	0	0	0
Ac_ciRNA_02147	0	0	0.137828	0	0.0418137	0	0.0403615	0	0	0	0	0	0	0	0	0	0	0	0	0	0	0	0	0	0	0	0.0986101	0.214829	0	0.167551
Ac_ciRNA_02150	0	0	0	0	0	0.0398119	0	0	0	0	0	0	0	0	0	0	0	0	0	0	0	0	0	0	0	0	0	0	0.0377743	0.0418878
Ac_ciRNA_02159	0.0631476	0	0	0	0.0418137	0.218965	0	0	0	0.191357	0	0	0	0	0.0443141	0	0	0	0	0	0	0	0	0	0.487075	0.106668	0.453606	0	0.13221	0
Ac_ciRNA_02161	0.0631476	0	0	0	0	0	0	0.156788	0.254101	0.170095	0.0776925	0	0	0	0	0	0	0	0	0	0	0	0	0	0	0	0	0	0	0
Ac_ciRNA_02164	0	0	0	0	0	0	0	0	0.0423501	0	0	0	0	0	0	0	0.0408939	0	0	0	0	0	0	0	0.088559	0.0426673	0.0788881	0.0644487	0.0566614	0.125663
Ac_ciRNA_02169	0	0	0	0	0	0	0	0	0	0	0	0	0	0	0	0	0	0	0	0	0	0	0	0	0	0	0.0788881	0	0.0755486	0.104719
Ac_ciRNA_02174	0	0	0	0	0	0	0	0	0	0	0	0	0	0	0	0	0	0	0	0	0	0	0	0	0	0.0426673	0.19722	0.128897	0.0377743	0
Ac_ciRNA_02177	0	0	0	0	0	0	0.0403615	0.117591	0	0	0	0	0	0	0	0	0	0	0	0	0	0	0	0	0	0	0	0	0	0
Ac_ciRNA_02179	0	0	0	0	0	0	0	0	0	0	0	0	0	0	0	0	0	0	0	0	0	0	0	0	0	0	0.138054	0.0429658	0.0377743	0
Ac_ciRNA_02195	0	0	0	0	0	0	0	0	0	0	0	0	0.0642175	0	0	0	0.0817877	0.0630255	0	0	0	0	0	0	0	0	0	0	0	0
Ac_ciRNA_02215	0	0	0	0	0	0	0	0	0	0	0	0	0	0	0	0	0	0	0	0	0	0	0	0	0.287817	0	0.177498	0.0644487	0.151097	0.104719
Ac_ciRNA_02226	0.841968	1.17257	0.216587	0.67854	0.543579	0.696708	0.161446	0.470364	0.698777	0.574072	0	0.768905	0.278276	0.210667	0.487455	0.336465	0.470279	0.42017	1.36774	2.26199	1.52399	2.07784	0.978797	2.2417	1.7269	1.53602	0.39444	1.28897	0.472178	3.12064
Ac_ciRNA_02227	0	0	0	0	0	0	0	0	0.211751	0.127572	0	0.283281	0.107029	0	0	0.112155	0	0	0	0	0	0	0	0	0	0	0	0	0	0
Ac_ciRNA_02231	0	0	0	0	0	0	0	0	0	0	0	0	0.0642175	0	0.0664711	0.067293	0.122682	0.0630255	0	0	0	0	0	0	0	0	0	0	0	0
Ac_ciRNA_02233	0	0	0	0	0	0	0	0.450766	0.550552	0.510286	0.116539	0.364218	0	0	0	0	0	0	0	0	0	0	0	0	0	0	0	0	0	0
Ac_ciRNA_02240	0	0.0450988	0	0	0	0	0	0	0	0	0	0.0404687	0	0	0	0.089724	0.0613408	0.0630255	0	0	0	0	0	0	0	0	0	0	0	0
Ac_ciRNA_02246	0	0	0	0	0	0	0	0	0	0	0	0	0	0	0.0886281	0.112155	0.0408939	0	0	0	0	0	0	0	0	0	0	0	0	0
Ac_ciRNA_02252	0.0420984	0	0	0	0	0.0597178	0	0	0	0.0637858	0	0	0.149841	0.0421334	0	0	0.0817877	0.0630255	0	0	0	0	0	0	0.088559	0.213337	0.118332	0	0.0566614	0
Ac_ciRNA_02266	0	0	0	0	0	0	0	0	0	0	0	0	0.0428117	0.0421334	0	0	0	0	0	0	0	0	0	0	0	0	0	0	0	0
Ac_ciRNA_02269	0.315738	0.879426	0.452864	0.419098	0.209069	0.617084	0.706326	0.333175	0.741127	0.574072	1.74808	0.505859	1.13451	1.17973	1.21864	1.65989	1.41084	1.26051	1.98944	4.1127	1.63131	2.21906	1.87248	1.68682	0.952009	0.917347	0.769159	0.623004	0.604388	0.544541
Ac_ciRNA_02273	0	0	0	0	0	0	0	0	0	0	0	0	0.128435	0.105333	0.0664711	0.044862	0.0817877	0.0840339	0	0	0	0	0	0	0	0	0	0	0	0
Ac_ciRNA_02274	0	0	0	0	0	0	0	0	0	0	0	0	0.0428117	0.0421334	0.0443141	0	0.0408939	0	0	0	0	0	0	0	0	0	0	0	0	0
Ac_ciRNA_02276	0	0	0	0	0	0	0	0	0	0.0425238	0	0	0.128435	0.0421334	0	0.089724	0.122682	0.0630255	0.145063	0	0.0858584	0	0	0	0	0.128002	0.236664	0.0644487	0.0566614	0
Ac_ciRNA_02278	0	0	0	0	0	0	0	0	0	0	0	0	0.192652	0.1264	0.0443141	0.336465	0.327151	0.126051	0	0	0	0	0	0	0	0	0	0	0	0
Ac_ciRNA_02282	0	0	0	0.0399141	0	0	0	0	0	0	0	0.0404687	0.0642175	0.1264	0	0.044862	0.0817877	0.0840339	0	0	0	0	0	0	0	0	0	0	0.0377743	0
Ac_ciRNA_02284	0	0	0	0	0	0	0	0	0	0	0	0	0.0428117	0.0421334	0	0	0	0	0	0	0	0	0	0	0	0	0	0	0	0
Ac_ciRNA_02285	0	0	0	0	0	0	0	0	0	0	0	0	0.214058	0.0842667	0.0664711	0.246741	0.102235	0	0	0	0	0	0	0	0	0	0	0	0	0
Ac_ciRNA_02288	0	0	0	0	0	0	0	0	0	0	0	0	0.0856233	0.0421334	0.0443141	0	0	0.042017	0	0	0	0	0	0	0	0	0	0	0	0
Ac_ciRNA_02289	0	0	0	0	0	0	0	0	0	0	0	0	0.299682	0.147467	0.22157	0.134586	0.143129	0.105042	0	0	0	0	0	0	0	0	0	0	0	0
Ac_ciRNA_02290	0	0	0	0	0	0	0	0	0	0	0	0	0.107029	0.0842667	0.110785	0	0	0.105042	0	0	0	0	0	0	0	0	0	0	0	0
Ac_ciRNA_02292	0.0631476	0	0.0590692	0.0798283	0.229976	0.0597178	0	0	0	0	0	0	0	0	0	0	0	0	0	0	0	0	0	0	0.0442795	0.362672	0.039444	0.0429658	0.339968	0.146607
Ac_ciRNA_02295	0	0	0	0	0	0	0.0403615	0	0	0	0	0	0	0	0	0	0	0	0	0	0	0	0	0	0.0442795	0	0.039444	0.0429658	0	0
Ac_ciRNA_02301	0.126295	0.157846	0	0	0	0.0796238	0	0	0	0	0	0	0	0	0	0	0	0	0	0	0	0	0	0	0.531354	0	0	0	0	0
Ac_ciRNA_02304	0	0.0450988	0.0590692	0	0.0418137	0.0597178	0	0	0	0	0	0	0	0	0	0	0	0	0	0	0	0	0	0	0.132839	0.149336	0.0788881	0.0644487	0.0755486	0.0628316
Ac_ciRNA_02305	0	0	0	0	0	0	0	0	0	0	0	0	0	0	0.0886281	0	0.143129	0.042017	0	0	0	0	0	0	0	0	0	0	0	0
Ac_ciRNA_02308	0	0	0	0	0	0	0	0	0	0.0850477	0.155385	0	0	0	0	0	0	0	0.145063	0.123381	0.150252	0.141213	0.106391	0.26634	0	0	0	0	0	0
Ac_ciRNA_02321	0	0	0	0	0	0	0	0	0	0	0.0971156	0	0	0	0	0	0	0	0.145063	0.102818	0	0.080693	0.0638346	0	0	0	0	0	0	0
Ac_ciRNA_02325	0	0	0	0	0	0	0	0	0	0	0	0	0.107029	0	0.22157	0.044862	0	0.0630255	0	0	0	0	0	0	0	0	0	0	0	0
Ac_ciRNA_02330	0.0420984	0.112747	0.0984487	0.0798283	0.0627206	0.139342	0.0605422	0.078394	0.0847003	0.127572	0	0.0809374	0.0642175	0	0	0.089724	0.0613408	0.147059	0	0	0	0	0.0425564	0	0	0.0853346	0.0986101	0.279278	0.0755486	0.104719
Ac_ciRNA_02331	0.0631476	0	0	0.0598712	0.0418137	0.119436	0.221988	0.156788	0.254101	0.191357	0.135962	0.161875	0.0642175	0.0421334	0.0664711	0	0	0.042017	0.12434	0.041127	0	0	0.0851128	0.0443901	0.132839	0.170669	0.216942	0.15038	0.0755486	0.146607
Ac_ciRNA_02332	0	0	0	0	0	0	0	0	0	0	0	0	0.0642175	0	0	0	0.0408939	0	0	0	0	0	0	0	0	0	0	0.0429658	0.0377743	0.0628316
Ac_ciRNA_02334	0	0	0	0	0	0	0	0.078394	0.0635252	0.10631	0	0.0607031	0.128435	0.210667	0.155099	0.044862	0.0408939	0.0840339	0	0	0	0	0	0	0	0	0	0	0	0
Ac_ciRNA_02335	0	0	0	0	0	0	0	0	0	0	0	0.0404687	0	0	0	0	0	0	0	0	0	0	0	0	0.0664193	0.170669	0	0	0	0.0418878
Ac_ciRNA_02340	0	0	0	0.139699	0	0	0	0	0.211751	0	0	0.364218	0	0	0	0	0	0	0	0	0.128788	0.161386	0.0851128	0.199755	0	0	0	0.300761	0	0
Ac_ciRNA_02351	0	0	0	0	0	0	0	0	0	0	0	0	0	0.0421334	0.0443141	0	0.0408939	0	0	0	0	0	0	0	0	0.064001	0.059166	0.0644487	0	0.0628316
Ac_ciRNA_02363	0	0	0	0	0	0	0	0	0	0	0	0	0.0642175	0.0421334	0	0	0	0.0840339	0	0	0	0	0	0	0	0	0	0	0	0
Ac_ciRNA_02367	0	0	0	0	0	0	0	0	0	0	0	0	0	0	0	0	0	0	0	0	0	0	0	0	0.177118	0.0426673	0	0.128897	0.207759	0.167551
Ac_ciRNA_02368	0	0	0.078759	0	0	0	0.0605422	0.274379	0.105875	0.170095	0.0776925	0.101172	0.107029	0.0842667	0.0886281	0	0.0613408	0.105042	0.0621699	0	0.0429292	0.080693	0	0.0665851	0	0.149336	0.19722	0.0429658	0.188871	0.146607
Ac_ciRNA_02369	0.0631476	0.0676482	0	0.0598712	0	0	0	0	0	0	0	0	0	0	0	0	0	0	0	0	0	0	0	0	0.177118	0.149336	0	0.193346	0	0.104719
Ac_ciRNA_02370	0.0631476	0	0	0	0.0418137	0	0	0	0	0	0	0	0.0642175	0.0421334	0.155099	0.067293	0	0.0840339	0	0	0	0	0	0	0	0	0	0.128897	0	0
Ac_ciRNA_02373	0.0841968	0	0.177208	0	0.0627206	0	0	0	0	0	0	0	0	0	0	0	0	0	0.103617	0	0	0	0	0	0	0	0.0788881	0	0.0566614	0.0628316
Ac_ciRNA_02374	0	0	0	0	0	0	0	0	0	0.0425238	0	0	0.0428117	0.0421334	0.0443141	0	0	0.0630255	0	0	0	0	0	0	0	0	0	0	0	0
Ac_ciRNA_02376	0	0	0	0	0	0	0	0	0	0	0	0	0.128435	0.0842667	0	0	0	0	0	0	0	0	0	0	0	0	0	0	0	0
Ac_ciRNA_02377	0	0	0.118138	0	0	0	0	0	0	0	0	0	0	0	0	0	0	0	0	0	0	0	0	0	0.0442795	0.064001	1.28193	0	1.51097	0.104719
Ac_ciRNA_02382	0	0	0	0	0	0	0	0	0	0	0.0582694	0	0	0	0	0	0	0	0.0621699	0.0616905	0	0	0.0851128	0.0887801	0	0	0	0	0	0
Ac_ciRNA_02386	0.0631476	0	0	0	0	0.0597178	0.141265	0.039197	0.232926	0.127572	0	0	0.107029	0	0.177256	0.089724	0	0.105042	0	0	0	0	0.276617	0.31073	0.265677	0.064001	0.039444	0.107414	0.0566614	0.0418878
Ac_ciRNA_02389	0	0	0	0	0	0	0.0403615	0	0	0	0	0.0607031	0	0	0	0	0	0	0	0	0	0	0	0	0	0	0.059166	0.0859316	0	0.0628316
Ac_ciRNA_02397	0	0	0	0.119742	0.0627206	0.0398119	0	0	0	0	0	0	0	0	0	0	0	0	0	0	0	0	0	0	0	0	0	0	0	0
Ac_ciRNA_02398	0	0	0	0	0	0	0	0	0	0	0	0.121406	0	0.1264	0	0	0.0613408	0.105042	0	0	0	0	0	0	0	0	0	0	0	0
Ac_ciRNA_02403	0	0	0	0	0	0.0398119	0	0	0	0	0	0	0.214058	0.105333	0.132942	0.112155	0.102235	0.105042	0	0	0	0	0	0	0	0	0	0	0	0
Ac_ciRNA_02404	0	0	0	0	0	0	0	0	0	0	0	0	0	0	0	0.067293	0.122682	0.0630255	0	0	0	0	0	0	0	0	0	0	0	0
Ac_ciRNA_02408	0.168394	0.0901976	0.118138	0.0798283	0	0.0995297	0.201807	0	0	0.148833	0	0.0607031	0.470928	0.147467	0.265884	0.314034	0.429386	0.378153	0	0	0	0	0	0	0.154978	0.0853346	0	0	0	0
Ac_ciRNA_02421	0	0	0	0	0	0	0	0	0.0635252	0.170095	0	0	0	0	0	0	0	0	0	0	0	0	0	0	0	0	0	0	0	0
Ac_ciRNA_02426	0	0	0	0	0	0	0	0	0	0	0	0	0	0	0	0	0.0408939	0.0630255	0	0	0	0	0	0	0	0	0	0	0	0
Ac_ciRNA_02427	0	0	0.0590692	0.199571	0	0	0	0	0	0	0	0	0	0	0	0	0	0	0	0	0	0	0	0	0	0	0	0	0	0
Ac_ciRNA_02434	0.27364	0.38334	0.0984487	0.259442	0.0836275	0	0.443976	0	0	0	0	0	0	0	0	0	0	0	0	0	0	0	0	0	0	0	0	0.128897	0	0.146607
Ac_ciRNA_02439	0	0.0450988	0.0393795	0.0598712	0	0	0.0403615	0	0	0	0	0	0	0	0	0	0	0	0	0	0	0	0	0	0	0	0	0.0429658	0	0
Ac_ciRNA_02442	0.0420984	0.135296	0.157518	0.0997853	0.146348	0.159248	0.201807	0.215584	0.190576	0.148833	0.0388462	0.242812	0.363899	0.337067	0.398826	0.426189	0.245363	0.42017	0	0	0.0858584	0	0	0	0.154978	0.256004	0.749437	0.343726	0.302194	0.460765
Ac_ciRNA_02443	0.168394	0.225494	0.354415	0.219528	0.125441	0.338401	0.726507	0.842736	0.677602	0.55281	0.135962	0.647499	0.192652	0.4424	0.509612	0.314034	0.654302	0.315127	0	0	0	0	0	0.0443901	0.265677	0.597342	2.64275	1.0097	1.13323	1.94778
Ac_ciRNA_02449	0.0841968	0.0901976	0	0.0399141	0.0836275	0.0398119	0	0.039197	0	0.0637858	0.0388462	0	0	0	0	0	0	0	0	0	0	0	0	0	0.088559	0.128002	0.118332	0.128897	0.0755486	0.293214
Ac_ciRNA_02453	0	0	0	0	0	0	0	0	0	0	0	0	0	0	0	0	0	0.0630255	0	0	0	0.080693	0.0638346	0.0443901	0	0	0	0	0	0
Ac_ciRNA_02458	0	0	0	0	0	0	0	0	0	0	0	0	0.0642175	0	0	0.112155	0.0613408	0.105042	0	0	0	0	0	0	0	0	0	0	0	0
Ac_ciRNA_02462	0	0	0	0	0.0418137	0.139342	0	0	0	0	0	0	0	0	0	0	0	0	0	0	0	0	0	0	0.132839	0.064001	0	0.0859316	0	0
Ac_ciRNA_02489	0	0	0	0	0	0	0	0.039197	0.12705	0.0850477	0.0776925	0	0	0	0	0	0	0	0	0	0	0.0403465	0	0	0	0	0	0	0	0
Ac_ciRNA_02494	0	0	0	0.0598712	0	0.0597178	0	0	0.0423501	0	0	0.0404687	0	0	0	0	0	0.0840339	0	0	0	0	0	0	0.088559	0.0426673	0.039444	0	0	0
Ac_ciRNA_02500	0	0	0	0	0	0	0	0.176387	0.105875	0.403976	0.0582694	0.343984	0	0	0	0	0	0	0	0	0	0	0	0	0	0	0	0	0	0
Ac_ciRNA_02502	0	0	0	0.179614	0	0.139342	0	0.293978	0.0847003	0.616596	0.233077	0.263047	0.727798	0.800534	0.997066	1.03183	1.86067	0.840339	0.207233	0	0	0	0	0	0	0	0	0	0	0
Ac_ciRNA_02504	0	0	0	0	0	0	0	0	0	0.297667	0.0971156	0	0.171247	0	0.22157	0.560775	0.408939	0.651263	0	0	0	0	0	0	0	0	0	0	0	0
Ac_ciRNA_02506	0	0	0	0	0	0	0	0	0	0	0	0	0	0.0632001	0.0664711	0.067293	0.0817877	0.0840339	0	0	0	0	0	0	0	0	0	0	0	0
Ac_ciRNA_02509	0	0	0	0	0	0	0	0	0.0423501	0	0.0388462	0	0	0	0	0	0	0	0.165786	0.246762	0	0.0605197	0.0425564	0	0	0	0	0	0	0
Ac_ciRNA_02513	0	0	0	0	0.0418137	0	0.121084	0	0.0423501	0	0	0.0404687	0	0	0	0	0.0408939	0	0	0.0616905	0.0429292	0	0.0638346	0.0443901	0	0.106668	0.059166	0.0429658	0.0566614	0.0837755
Ac_ciRNA_02518	0	0	0	0	0	0	0	0	0	0	0	0	0.0642175	0.0421334	0.0443141	0.089724	0.224916	0.0630255	0.0828932	0	0	0	0	0	0	0	0.0788881	0	0.0377743	0
Ac_ciRNA_02519	0	0	0	0	0	0	0	0	0	0	0	0	0.278276	0.168533	0.177256	0.22431	0.184022	0.189076	0	0	0	0	0	0	0	0	0.059166	0	0.0377743	0
Ac_ciRNA_02525	0	0	0	0	0	0	0	0	0	0	0	0	0.556552	0.653067	0.376669	0.314034	0	0.42017	0	0	0	0	0	0	0	0	0	0	0	0
Ac_ciRNA_02527	0	0	0	0	0	0	0	0	0	0	0	0	0.192652	0.1896	0	0.067293	0.184022	0	0	0	0	0	0	0	0	0	0	0	0	0
Ac_ciRNA_02534	0	0	0	0	0	0	0	0	0	0	0.135962	0	0	0	0	0	0	0	0.12434	0.041127	0.107323	0.242079	0	0	0	0	0	0	0	0
Ac_ciRNA_02540	0	0	0	0	0	0	0	0	0	0	0	0	0.492334	0.421334	0.376669	0.381327	0.79743	0.42017	0	0	0	0	0.319173	0.244145	0	0	0	0	0	0
Ac_ciRNA_02541	0	0	0	0	0	0	0	0	0	0	0	0	0	0	0	0.089724	0.0817877	0.0630255	0	0	0	0	0	0	0	0	0	0	0	0
Ac_ciRNA_02544	0	0	0	0	0	0	0	0	0	0	0.174808	0	0.278276	0.294934	0.199413	0	0.449833	0.357144	0.0414466	0.041127	0.0858584	0.080693	0.0851128	0.244145	0	0	0	0	0	0
Ac_ciRNA_02545	0	0	0	0	0	0	0	0	0.190576	0.148833	0.291347	0.202344	0	0	0.0886281	0	0.0408939	0	0.165786	0.329016	0.27904	0.403465	0.212782	0.488291	0	0	0	0	0	0
Ac_ciRNA_02546	0.0420984	0.0450988	0.216587	0.0997853	0.0836275	0	0.302711	0	0	0.0425238	0	0	0	0	0	0	0	0	0	0	0	0	0	0	0.110699	0.405339	3.21469	1.26749	1.58652	0.795867
Ac_ciRNA_02548	0	0	0	0	0	0	0	0	0	0	0	0	0.0642175	0.0632001	0	0	0	0	0	0	0	0	0	0	0	0	0	0	0	0
Ac_ciRNA_02558	0	0	0	0	0	0	0	0	0	0	0.0582694	0	0.0428117	0	0	0	0	0	0.0414466	0.041127	0.0429292	0	0	0.0443901	0	0	0	0	0	0
Ac_ciRNA_02564	0	0	0	0	0	0	0	0	0.0847003	0.0637858	0	0.222578	0	0	0	0	0	0	0	0	0	0	0	0	0	0	0	0	0.0377743	0
Ac_ciRNA_02567	0	0	0	0	0	0	0	0	0	0	0	0.0607031	0	0	0	0	0	0	0	0	0	0	0	0	0	0.106668	0.0986101	0.0859316	0.0377743	0.146607
Ac_ciRNA_02568	0	0	0	0	0	0	0	0	0	0	0	0	0	0	0	0	0	0	0	0	0.0429292	0.0403465	0	0	0	0	0	0	0	0
Ac_ciRNA_02572	0	0	0	0	0	0	0	0	0	0	0	0	0	0	0	0	0	0	0	0	0	0	0	0	0	0	0.059166	0.0429658	0.0566614	0.0628316
Ac_ciRNA_02573	0	0	0	0	0	0	0	0	0	0	0	0.0404687	0.0428117	0.0632001	0	0	0	0.105042	0	0	0	0	0	0	0	0	0	0	0	0
Ac_ciRNA_02574	0	0	0	0	0	0.0597178	0	0	0	0	0	0	0	0	0	0	0	0	0	0	0	0	0	0	0	0	0.059166	0.0429658	0.0944357	0.0628316
Ac_ciRNA_02575	0	0	0	0	0	0	0	0	0	0	0.0776925	0	0	0	0	0	0	0	0	0.041127	0	0	0.106391	0.22195	0	0	0	0	0	0
Ac_ciRNA_02580	0	0	0	0	0	0	0	0.176387	0.105875	0	0.0582694	0.32375	0	0	0	0.358896	0.490726	0.27311	0	0	0	0	0	0	0	0	0	0	0	0
Ac_ciRNA_02581	0	0	0	0	0	0	0	0	0	0	0.0776925	0	0.470928	0	0.288041	0.314034	0.327151	0	0	0	0	0	0	0	0	0	0	0	0	0
Ac_ciRNA_02583	0	0	0	0	0	0	0	0	0	0	0.213654	0	0	0.168533	0	0	0	0	0	0	0.0429292	0.080693	0.127669	0.155365	0	0	0	0	0	0
Ac_ciRNA_02584	0	0	0	0	0	0	0	0.117591	0	0.10631	0	0.14164	0.535146	0.463467	0.310198	0.785085	0.899665	0	0	0.041127	0	0	0	0	0	0	0	0	0	0
Ac_ciRNA_02586	0	0	0	0	0	0	0	0	0	0	0	0	0.0642175	0	0.0443141	0.134586	0.0817877	0.042017	0	0	0	0	0	0	0	0	0	0	0	0
Ac_ciRNA_02588	0	0	0	0	0	0	0	0	0	0	0.62154	0	0	0	0	0	0	0	0.393743	0.514088	0.472221	0.927969	0.361729	0.887801	0	0	0	0	0	0
Ac_ciRNA_02589	0	0	0	0	0	0	0	0	0	0	0	0	0.192652	0.168533	0.22157	0.291603	0.143129	0.27311	0	0	0	0	0	0	0	0	0	0	0	0
Ac_ciRNA_02592	0.210492	0.248043	0.334726	0.0598712	0.125441	0	0.100904	0	0.148225	0	0	0.303515	0.0642175	0.0421334	0	0	0.224916	0	0	0	0	0	0	0.17756	0.154978	0	0	0	0	0.0628316
Ac_ciRNA_02597	0	0	0.0393795	0	0	0	0	0	0	0	0	0	0.214058	0.0842667	0.132942	0.134586	0.0817877	0	0	0	0	0	0	0	0	0	0	0	0	0
Ac_ciRNA_02603	0	0	0	0	0	0	0	0	0	0	0	0	0	0	0	0	0	0	0	0	0	0	0	0	0	0	0.059166	0.107414	0.0566614	0.0418878
Ac_ciRNA_02608	0	0.112747	0.0984487	0.0798283	0	0	0	0	0	0	0.135962	0	0.0642175	0.0421334	0.0886281	0	0.26581	0.168068	0.0621699	0.390707	0.150252	0	0.106391	0.13317	0	0	0.433884	0	0.358856	0
Ac_ciRNA_02609	0	0	0	0	0	0	0	0	0	0	0	0	0	0	0	0.201879	0	0	1.16051	1.33663	0.343434	0	0.936241	0.776826	0	0	0	0	0	0
Ac_ciRNA_02614	0	0	0	0	0	0	0	0	0	0	0.0971156	0	0.0642175	0	0.0443141	0	0	0	0.0621699	0.102818	0.0429292	0.121039	0	0	0	0	0.039444	0.0644487	0	0
Ac_ciRNA_02617	0	0	0	0	0	0	0	0	0	0	0	0	0.0428117	0.0421334	0.0443141	0.044862	0	0.042017	0	0	0	0	0	0	0	0	0.039444	0	0.0377743	0
Ac_ciRNA_02624	0	0	0	0	0	0	0	0	0	0	0	0	0	0	0	0	0.102235	0.0840339	0	0	0	0	0	0	0	0	0	0	0	0
Ac_ciRNA_02625	0	0	0	0	0.0418137	0.0398119	0	0	0	0	0	0	0	0	0	0	0	0	0	0	0	0	0	0	0.0442795	0	0	0.0429658	0	0.0418878
Ac_ciRNA_02626	0	0	0	0	0	0	0	0.078394	0.0423501	0.0425238	0	0	0	0	0	0	0	0	0	0	0	0	0	0	0	0	0	0	0	0
Ac_ciRNA_02627	0	0	0	0	0.0836275	0.0398119	0	0	0	0	0	0	0	0	0	0	0.0408939	0	0	0	0	0	0	0	0	0.064001	0.039444	0.0859316	0.0377743	0.0418878
Ac_ciRNA_02635	0	0	0	0	0	0	0	0	0	0	0.0776925	0	0	0	0	0	0	0	0.103617	0.102818	0.0643938	0.080693	0.0638346	0	0	0	0	0	0	0
Ac_ciRNA_02646	0	0	0	0	0	0.0398119	0	0	0	0	0	0	0	0	0	0	0	0	0	0	0	0	0	0	0.088559	0.0426673	0.039444	0	0	0.0418878
Ac_ciRNA_02649	0.147344	0.38334	0.216587	0.179614	0.188162	0.258777	0	0	0	0	0	0	0	0	0	0	0	0	0	0	0	0	0	0	0.354236	0.362672	0.433884	1.07414	0.698824	1.50796
Ac_ciRNA_02651	0.0420984	0.0450988	0	0.0997853	0.104534	0.199059	0	0	0	0	0	0	0	0	0	0	0	0	0	0	0	0	0	0	0.199258	0.170669	0.059166	0.257795	0.283307	0.544541
Ac_ciRNA_02660	0	0	0	0	0	0	0	0	0	0	0	0	0.128435	0	0.0443141	0.044862	0.245363	0.168068	0	0	0	0	0	0	0	0	0	0	0	0
Ac_ciRNA_02665	0	0	0	0	0	0	0	0	0.762302	0.361453	0.388462	0.647499	0	0	0	0.044862	0	0	0	0	0.214646	0.302599	0.446842	0.510486	0.221398	0	0	0	0	0
Ac_ciRNA_02670	0.610427	0.405889	0.689141	0.858154	0.397231	0.836049	1.17048	1.54828	2.03281	1.84979	0.271924	2.95422	1.49841	0.737334	0.864124	1.21127	1.36994	1.65967	0	0	0	0	0	0	0.376376	0.384006	1.49887	0.472624	0.113323	0.188495
Ac_ciRNA_02673	0	0	0	0	0	0	0	0.0587955	0.0423501	0	0.0388462	0.0607031	0	0	0	0	0	0	0	0	0	0	0	0	0	0	0	0	0	0
Ac_ciRNA_02682	0	0	0	0	0	0	0	0	0	0	0	0	0	0	0	0	0	0	0	0	0	0	0	0	0	0	0.039444	0.0429658	0	0.0418878
Ac_ciRNA_02684	0	0	0	0	0.0418137	0.0796238	0	0	0	0	0	0	0	0	0	0	0	0	0	0	0	0	0	0	0.354236	0.0853346	0	0.0644487	0.0566614	0.125663
Ac_ciRNA_02685	0	0	0	0	0	0	0	0	0	0	0	0	0.128435	0.273867	0.243727	0.291603	0.163575	0	0	0	0.257575	0	0	0	0	0	0	0	0	0
Ac_ciRNA_02688	0	0	0.078759	0	0	0	0	0.215584	0	0	0	0.586796	0	0	0.288041	0.515913	0	0	0	0	0	0	0	0	0	0	0.039444	0	0	0.0837755
Ac_ciRNA_02690	0	0	0	0	0	0	0	0	0	0	0	0	0	0.105333	0.310198	0.201879	0.143129	0.399161	0	0	0	0	0	0	0	0	0	0	0	0
Ac_ciRNA_02692	0	0	0	0	0	0	0	0	0	0	0	0	0.599363	0.421334	0.354512	0.471051	0.306704	0.441178	0	0	0	0	0	0	0	0	0	0	0	0
Ac_ciRNA_02693	0	0	0	0	0	0	0	0	0	0	0	0	0.171247	0.105333	0.155099	0	0	0	0	0	0	0	0	0	0	0	0	0	0	0
Ac_ciRNA_02695	0	0	0	0	0	0	0	0.685948	0.402326	0.191357	0	0.222578	1.77668	1.11653	1.10785	0.986965	1.61531	1.36555	0	0	0	0	0	0	0	0	0	0	0	0
Ac_ciRNA_02697	0	0	0	0	0.104534	0	0	0	0	0	0	0	0	0	0	0	0	0	0	0	0.214646	0.161386	0.106391	0	0	0	0	0	0	0
Ac_ciRNA_02701	0	0.157846	0	0	0	0	0	0	0	0	0	0	0	0	0	0	0	0	0	0	0	0	0	0	0.642053	0.768012	0	0	0	0.795867
Ac_ciRNA_02714	0	0	0	0	0	0	0	0	0	0	0	0	0	0	0	0	0	0	0.0414466	0.123381	0.0858584	0.100866	0.0851128	0	0	0	0	0	0	0
Ac_ciRNA_02715	0	0	0	0	0	0	0	0.039197	0	0	0	0	0	0	0	0	0	0	0	0	0	0	0	0	0.0442795	0.0426673	0	0	0	0.0418878
Ac_ciRNA_02717	0	0	0	0	0.0418137	0	0	0	0	0	0	0.0404687	0	0	0	0	0	0	0	0	0	0	0	0	0.0664193	0.106668	0.039444	0.0644487	0	0
Ac_ciRNA_02722	0	0	0	0	0	0	0	0	0	0	0	0	0.299682	0.168533	0.288041	0.291603	0	0.168068	0	0	0	0	0	0	0	0	0	0	0	0
Ac_ciRNA_02726	0	0	0	0	0	0	0	0	0	0	0	0	0.171247	0.0421334	0.0664711	0.157017	0.0613408	0	0	0	0	0	0	0	0	0	0	0	0	0
Ac_ciRNA_02737	0	0	0	0	0	0	0	0	0	0	0	0	0.0428117	0.0421334	0.0443141	0	0	0	0	0	0	0	0	0	0	0	0	0	0	0
Ac_ciRNA_02745	0	0	0	0	0	0	0	0	0	0	0	0	0.171247	0.1896	0	0	0	0	0	0	0	0	0	0	0	0	0	0	0	0
Ac_ciRNA_02749	0	0	0	0	0	0	0	0	0	0	0	0	0	0	0	0	0	0	0	0	0	0	0	0	0.0442795	0.0853346	0	0	0	0
Ac_ciRNA_02750	0	0	0	0	0	0	0	0	0	0	0	0	0	0	0	0	0	0	0	0	0	0	0	0	0.0442795	0	0.749437	0.214829	0.0377743	0.0628316
Ac_ciRNA_02751	0	0	0	0	0	0	0	0	0	0	0	0	0	0	0.0886281	0.044862	0.0613408	0	0	0	0	0	0	0	0	0	0	0	0	0.104719
Ac_ciRNA_02753	0	0	0	0	0	0	0	0	0.0635252	0.0850477	0	0.0607031	0	0	0	0	0	0	0	0	0	0	0	0	0	0	0	0	0	0
Ac_ciRNA_02758	0	0	0	0	0	0	0	0	0	0	0	0	0	0	0	0	0	0	0	0	0	0	0	0	0.0442795	0.106668	0.19722	0.0644487	0	0.146607
Ac_ciRNA_02765	0	0	0	0	0	0	0	0	0	0	0	0	0	0	0	0	0	0	0	0	0	0	0	0	0.154978	0.0853346	0	0	0	0
Ac_ciRNA_02766	0.0420984	0	0	0	0	0.0796238	0	0	0	0	0	0	0	0	0	0	0	0	0	0	0	0	0	0	0.132839	0.0853346	0.039444	0.128897	0	0
Ac_ciRNA_02772	0	0	0	0	0	0	0	0	0	0	0	0	0.385305	0.2528	0.354512	0.291603	0.26581	0.42017	0	0	0	0	0	0	0.686332	0	0	0	0	0
Ac_ciRNA_02776	0	0	0	0	0	0	0	0	0	0	0	0	0	0	0	0	0	0	0	0	0	0	0	0	0	0	0.0986101	0.107414	0	0.167551
Ac_ciRNA_02783	0	0.0450988	0	0	0.0418137	0.0597178	0.28253	0	0	0	0.0388462	0.0809374	0	0	0	0	0	0	0	0	0	0	0	0	0.110699	0.0426673	0.276108	0.128897	0.13221	0.188495
Ac_ciRNA_02784	0	0.0450988	0	0	0	0	0.080723	0	0	0	0	0	0	0.0842667	0.0664711	0.112155	0.286257	0	0.0621699	0.041127	0	0	0	0	0.132839	0	0.039444	0.0429658	0	0
Ac_ciRNA_02786	0	0.0450988	0.0590692	0.0997853	0	0.119436	0.121084	0	0	0	0	0	0	0	0	0	0	0	0	0	0	0	0	0	0.0664193	0.213337	0.19722	0.0644487	0.0377743	0.27227
Ac_ciRNA_02787	0	0	0	0	0	0	0.0605422	0	0	0	0	0	0	0	0	0	0	0	0	0	0	0	0	0	0	0	0	0	0.0377743	0.0628316
Ac_ciRNA_02789	0	0.0450988	0.0590692	0	0.0418137	0.0398119	0.100904	0	0	0.0637858	0	0	0	0	0	0	0	0	0.0414466	0	0.0429292	0.0403465	0	0	0	0.064001	0.039444	0	0	0
Ac_ciRNA_02791	0	0	0	0	0	0	0.0605422	0	0	0	0	0.0404687	0	0	0	0	0	0	0	0	0	0	0	0	0.132839	0	0.157776	0.300761	0	0.209439
Ac_ciRNA_02793	0.547279	0.473537	0.236277	0.459013	1.14988	1.3337	0	0	0	0	0	0	0	0	0	0	0	0	0	0	0	0	0	0	1.28411	1.77069	0.729714	1.41787	0.698824	1.5289
Ac_ciRNA_02795	0	0	0	0	0	0	0	0	0	0	0	0	0.0856233	0.105333	0.0443141	0	0.0613408	0.0630255	0	0	0	0	0	0	0	0	0	0	0	0
Ac_ciRNA_02796	0.105246	0.0901976	0.137828	0.119742	0	0.179153	0.443976	0.117591	0.105875	0.212619	0	0.202344	0	0	0	0	0	0	0	0	0	0	0	0	0.199258	0.106668	0.216942	0.0859316	0.0566614	0
Ac_ciRNA_02804	0	0	0	0	0	0	0	0	0	0	0	0	0	0	0	0	0	0	0	0	0	0	0	0	0	0	0.039444	0	0.0566614	0.146607
Ac_ciRNA_02806	0	0	0	0	0	0	0	0	0	0	0	0	0.107029	0	0.22157	0.201879	0.0817877	0.252102	0	0	0	0	0	0	0	0	0	0	0	0
Ac_ciRNA_02808	0	0	0	0	0	0	0	0	0	0	0.485578	0	0	0	0	0	0	0	0	0	0.364898	0	0.297895	0.31073	0	0	0	0	0	0
Ac_ciRNA_02809	0	0	0	0	0	0	0.080723	0	0	0	0.349616	0	0.192652	0.168533	0.110785	0.179448	0.122682	0.315127	0	0.390707	0.686868	0	0.872406	0.621461	0.221398	0	0	0	0	0.146607
Ac_ciRNA_02810	0	0	0	0	0	0	0	0	0	0	0.485578	0	0	0	0	0	0	0	0.994719	0.76085	0.901514	0.80693	0.638346	0.732436	0	0	0	0	0	0
Ac_ciRNA_02811	0	0	0	0	0	0	0	0	0	0	0.174808	0	0.0856233	0.105333	0.0886281	0	0.102235	0.189076	0.331573	0.329016	0.450757	0.383292	0.297895	0.199755	0	0	0	0	0	0
Ac_ciRNA_02812	0	0	0	0	0	0	0	0	0	0	0	0	0	0	0	0	0	0	0	0	0	0	0	0	0.088559	0.064001	0	0	0	0
Ac_ciRNA_02822	0	0	0	0	0	0	0	0	0	0	0	0	0.0642175	0.0421334	0.0664711	0.044862	0.0408939	0.0630255	0	0	0	0	0	0	0	0	0	0	0	0
Ac_ciRNA_02823	0	0	0	0	0	0	0	0	0	0	0	0	0	0	0	0	0	0	0.0414466	0.041127	0	0	0	0	0	0	0	0	0	0
Ac_ciRNA_02833	0	0	0	0	0	0	0	0	0	0	0	0.101172	0	0.0421334	0	0	0	0	0	0	0	0	0	0	0.0664193	0	0.0788881	0.257795	0.151097	0.0837755
Ac_ciRNA_02841	0	0	0	0	0	0	0	0	0	0.0425238	0	0	0	0	0	0	0	0	0	0	0	0	0	0	0	0	0.039444	0	0.0377743	0.0628316
Ac_ciRNA_02844	0	0	0	0	0	0	0	0	0	0	0	0	0.0428117	0.0632001	0.0443141	0.089724	0	0.0630255	0	0	0	0	0	0	0	0	0	0	0	0
Ac_ciRNA_02847	0.294689	0.135296	0.374105	0.239485	0.167255	0.258777	1.77591	1.80306	0.359976	0.361453	0	0.32375	0.278276	0.147467	0.243727	0.157017	0.122682	0.105042	0	0	0	0	0	0	0	0.0426673	0.059166	0	0.0755486	0.230383
Ac_ciRNA_02851	0	0	0	0	0	0	0	0	0	0	0	0	0.0428117	0.0842667	0.0664711	0.067293	0	0	0	0	0	0	0	0	0	0	0	0	0	0
Ac_ciRNA_02852	0	0	0	0	0	0	0	0	0	0	0	0	0.0642175	0.0632001	0	0	0	0	0	0	0	0	0	0	0	0	0	0	0	0
Ac_ciRNA_02855	0	0.0450988	0	0.0598712	0	0.0796238	0.181627	0.0587955	0.0423501	0.0425238	0.0582694	0.0809374	0	0	0	0	0.0613408	0	0	0	0	0	0	0	0	0.0853346	0	0	0	0
Ac_ciRNA_02859	0.0420984	0	0	0	0	0	0	0	0	0	0	0	0	0	0	0	0	0	0	0	0	0	0	0	0.0442795	0.064001	0	0	0	0
Ac_ciRNA_02862	0	0	0	0	0	0	0.0605422	0	0	0.0425238	0	0	0.107029	0.1264	0.0664711	0.044862	0.102235	0	0	0	0	0	0	0	0	0.106668	0.138054	0	0.113323	0
Ac_ciRNA_02865	0.231541	0.293142	0.216587	0.119742	0.292696	0.338401	0.201807	0.156788	0.169401	0.148833	0.369039	0.121406	0.149841	0.1896	0.0664711	0.112155	0.184022	0.210085	0.24868	0.370143	0.193181	0.302599	0.383008	0.488291	0.487075	0.512008	0.335274	0.343726	0.26442	0.209439
Ac_ciRNA_02868	0	0	0	0	0	0	0	0	0	0	0	0	0	0	0	0	0	0	0.0414466	0	0	0.0605197	0	0	0.0442795	0	0.039444	0	0.0566614	0.0418878
Ac_ciRNA_02870	0	0	0	0	0	0	0	0	0	0	0.233077	0	0	0.3792	0.288041	0.403758	0	0	0	0	0.321969	0.161386	0.319173	0	0	0	0	0	0	0
Ac_ciRNA_02875	0	0.0676482	0	0	0	0	0	0.078394	0.148225	0.127572	0	0.242812	0	0	0	0	0	0	0	0	0	0	0	0	0.088559	0	0.118332	0	0	0
Ac_ciRNA_02876	0.0420984	0.0450988	0	0	0	0	0	0.039197	0.0635252	0.0850477	0.0388462	0	0	0	0	0	0	0	0	0	0	0	0	0	0	0	0.177498	0	0	0
Ac_ciRNA_02877	0	0	0	0	0	0	0.0605422	0	0	0	0	0.0404687	0	0	0	0	0	0	0	0	0	0	0	0	0	0.0853346	0.039444	0.0429658	0	0.0837755
Ac_ciRNA_02880	0	0	0	0	0	0	0	0	0	0	0	0	0.149841	0.0842667	0.177256	0.157017	0.122682	0.105042	0	0.0616905	0	0	0	0	0	0	0	0	0	0
Ac_ciRNA_02881	0	0	0	0	0	0	0	0	0	0	0	0	0	0	0	0	0	0	0	0.041127	0	0	0.0425564	0.0443901	0	0	0	0	0	0
Ac_ciRNA_02882	0	0	0	0	0	0.0398119	0	0.039197	0	0	0	0	0.278276	0.168533	0.132942	0.179448	0.122682	0	0	0	0	0	0	0	0	0.064001	0	0.0644487	0	0
Ac_ciRNA_02883	0	0	0.0393795	0	0	0.0597178	0	0	0	0	0	0	0	0	0	0	0	0	0	0	0	0	0	0	0	0	0.118332	0.0429658	0.0755486	0.0418878
Ac_ciRNA_02886	0	0	0	0	0	0	0	0	0	0	0	0	0.25687	0.0632001	0.243727	0.134586	0.470279	0.126051	0	0	0	0	0	0	0	0	0	0	0	0
Ac_ciRNA_02899	0	0	0	0	0	0	0	0	0	0	0	0	0	0	0	0	0	0	0.0414466	0.041127	0	0	0	0	0	0	0	0	0	0
Ac_ciRNA_02900	0	0	0.0393795	0	0	0	0	0	0	0	0	0	0	0	0	0	0	0	0	0	0	0	0	0	0.0442795	0.0426673	0.0986101	0	0.13221	0
Ac_ciRNA_02903	0	0	0	0	0	0	0.0605422	0	0	0	0.155385	0.0404687	0	0	0	0	0	0	0	0.143945	0.107323	0	0.0638346	0	0	0	0	0.128897	0	0.0418878
Ac_ciRNA_02904	0	0	0	0	0	0	0	0	0	0	0.0388462	0	0	0	0.0443141	0	0	0	0.0621699	0	0.0643938	0.0605197	0.0638346	0.0443901	0	0	0	0	0	0
Ac_ciRNA_02906	0	0	0	0	0	0.0597178	0	0	0	0	0	0	0	0	0	0	0	0	0	0	0	0	0	0	0	0	0.039444	0.0644487	0.0377743	0.0628316
Ac_ciRNA_02935	0	0	0	0	0	0	0	0	0	0	0.0582694	0	0	0	0	0	0	0	0.0414466	0.123381	0.128788	0.0605197	0	0.0887801	0	0	0	0	0	0
Ac_ciRNA_02936	0.231541	0.248043	0.137828	0.199571	0.229976	0.238871	0	0.0587955	0.0847003	0	0.0582694	0.14164	0.0428117	0	0.0664711	0.044862	0.0817877	0	0.0621699	0.205635	0.150252	0.0605197	0.127669	0.0887801	0.398516	0	0.433884	0.730418	0	0.712092
Ac_ciRNA_02937	0	0	0	0	0	0	0	0	0	0.0637858	0.233077	0	0.0642175	0.147467	0.132942	0.134586	0.102235	0	0.331573	0.143945	0.150252	0.282425	0.170226	0.377316	0	0	0	0	0	0
Ac_ciRNA_02938	0	0	0	0	0	0	0	0	0	0	0.0776925	0	0	0	0	0	0	0	0	0.0616905	0	0.141213	0.127669	0.17756	0	0	0	0	0	0
Ac_ciRNA_02945	0.147344	0.157846	0.157518	0	0	0	0.686145	1.52868	0	0	0.369039	1.82109	0	0	0	0	0	0	0	0.493524	0	0	0.383008	0.13317	0.309957	0	0.552216	0	1.28433	0
Ac_ciRNA_02953	0	0	0	0	0	0	0	0	0	0	0	0.182109	0.470928	0	0.265884	0.583206	0.879218	0.42017	0.497359	0.596342	0	0	0	0.332926	0	0	0	0	0	0
Ac_ciRNA_02954	0	0	0	0	0	0	0	0	0	0	0	0	0.449522	0.547734	0.22157	0.291603	0.224916	0	0	0	0	0	0	0	0	0	0	0	0	0
Ac_ciRNA_02955	0	0	0	0	0	0	0	0	0	0	0	0	0.149841	0.0842667	0.0443141	0	0	0.105042	0	0	0	0	0	0	0	0	0	0	0	0
Ac_ciRNA_02957	0	0	0	0	0	0.418025	0	0	0.105875	0	0.0776925	0	4.06711	3.64454	1.97198	2.93846	2.0038	1.00841	0	0	0.0858584	0.080693	0	0	0	0	0	0	0	0
Ac_ciRNA_02959	0	0	0	0	0	0	0	0	0	0	0.0776925	0	0	0	0	0	0	0	0	0	0	0.080693	0.0851128	0.0665851	0	0	0	0	0	0.209439
Ac_ciRNA_02962	0	0	0	0	0	0	0	0	0	0	0	0	0	0	0	0	0	0	0	0	0.0429292	0	0.0638346	0.0443901	0	0	0	0	0	0
Ac_ciRNA_02963	0.0420984	0	0	0	0	0	0	0.039197	0	0	0.0582694	0	0	0	0	0	0	0	0.0621699	0.185072	0.171717	0.322772	0.148947	0	0	0.0853346	0	0	0	0
Ac_ciRNA_02970	0	0	0	0	0	0	0.0403615	0.0587955	0	0	0	0.0809374	0	0	0	0	0	0	0	0	0	0	0	0	0	0	0	0	0	0
Ac_ciRNA_02971	0.0420984	0.0676482	0.0393795	0.0399141	0	0	0.121084	0.156788	0.0847003	0.10631	0	0.0607031	0	0	0	0	0	0	0	0	0	0	0	0	0.177118	0.149336	0.236664	0.236312	0.151097	0.209439
Ac_ciRNA_02974	0	0	0	0.0399141	0	0.0398119	0.080723	0.078394	0.0635252	0.0850477	0	0.0404687	0.299682	0.168533	0.110785	0.134586	0.224916	0.27311	0	0	0	0	0	0	0.088559	0.0426673	0.059166	0.0859316	0	0.0628316
Ac_ciRNA_02978	0.0841968	0.0901976	0.0393795	0.0997853	0.0418137	0.0796238	0.121084	0.039197	0	0	0	0	0	0.0421334	0	0	0.0408939	0	0	0	0	0	0	0	0.0664193	0.128002	0	0.0429658	0	0
Ac_ciRNA_02981	0.0631476	0.0901976	0	0	0	0	0	0	0	0	0	0	0.0428117	0	0.0443141	0	0.0408939	0	0	0	0	0	0	0	0	0.0426673	0	0.0644487	0	0.0628316
Ac_ciRNA_02986	0	0	0	0	0	0	0	0	0	0	0	0	0.706392	0.779467	0.465298	0.44862	0.654302	0.42017	0	0	0	0	0	0	0	0	0	0	0	0
Ac_ciRNA_02995	0.0841968	0	0	0	0.0836275	0	0.181627	0.254781	0.317626	0.510286	0.31077	0.505859	0.128435	0.1264	0	0.246741	0.204469	0.231093	0.31085	0.164508	0.27904	0.605197	0.23406	0.26634	0.398516	0	0.571938	0.322243	0.283307	0.167551
Ac_ciRNA_02997	0	0	0	0	0	0	0	0	0	0	0	0	0.406711	0	0.487455	0	0.654302	0.651263	0	0	0	0	0	0	0	0	0	0	0	0
Ac_ciRNA_03001	0	0	0.393795	0	0	0	0	0	0	0	0	0	0	0	0	0	0	0	0	0	0	0	0	0	0	0.746678	0.473328	0.644487	0	0
Ac_ciRNA_03004	0	0.225494	0	0	0	0	0	0	0	0	23.3466	0	0.406711	0.231734	2.61453	0.919671	1.67665	2.16387	0	5.0175	28.6123	38.6923	3.97902	15.4921	0	0	0	0	0	0
Ac_ciRNA_03005	0	0	0	0	0	0	0	0	0	0	20.1806	0	0.385305	0	3.50081	1.18884	1.98335	3.99161	0.455913	4.52397	25.6717	35.9084	3.72368	16.158	0	0	0	0	0	0
Ac_ciRNA_03009	0	0	0	0	0	0	0.0605422	0	0	0	0	0	0.0428117	0	0.0443141	0.067293	0.0613408	0	0	0	0	0	0	0	0	0	0	0	0	0
Ac_ciRNA_03012	0	0	0.275656	0.0598712	0	0	0	0	0	0	0	0	0	0	0	0	0	0	0	0	0	0	0	0	0	0	0	0	0	0
Ac_ciRNA_03013	0	0	0	0	0	0	0	0	0	0	2.73866	0	0	0	0	0	0	0	2.38318	2.75551	1.95328	2.62252	2.87256	3.39584	0	0	0	0	0	0
Ac_ciRNA_03015	0	0	0	0	0	0	0.26235	0	0	0	0	0	0.192652	0.273867	0	0	0	0.819331	0	0	0	0	0	0	0	0.0426673	0.039444	0.0644487	0	0
Ac_ciRNA_03017	0	0	0	0	0	0	0	0.509561	1.1858	1.0631	0	2.0032	0	0.695201	0	0	0	1.86976	0	1.31606	0	0	0	0	0	0	0	0	0	0
Ac_ciRNA_03018	0	0	0	0	0	0	0	0.039197	0	0.0637858	0.0582694	0.0607031	0	0	0	0	0	0	0	0	0	0	0	0	0	0	0	0	0	0
Ac_ciRNA_03019	0	0	0	0	0	0	0	0	0	0	0.155385	0	0.0642175	0.0632001	0	0.157017	0	0	0.12434	0	0	0.121039	0	0	0	0	0	0	0	0
Ac_ciRNA_03027	0	0.0901976	0.118138	0	0	0.0398119	0.0605422	0	0	0	0.0388462	0.0404687	0.0642175	0.105333	0.0443141	0.044862	0.143129	0.0840339	0	0	0	0	0	0	0.132839	0.213337	0.788881	0.472624	0.453291	0.565485
Ac_ciRNA_03030	0	0	0	0	0	0	0	0	0	0	0.135962	0	0	0	0	0	0	0	0	0	0.150252	0.121039	0.106391	0.22195	0	0	0	0	0	0
Ac_ciRNA_03031	0	0	0	0	0	0	0	0.039197	0	0	0	0	0	0	0	0	0	0	0.12434	0.0822541	0	0	0	0.13317	0	0	0	0	0	0
Ac_ciRNA_03042	0.841968	0	0	0	0.836275	1.63229	0	0	0	0	0	0	0	0	0	0	1.24726	1.15547	0	0.41127	0	0	0	1.37609	0	0	0	0	1.00102	0.795867
Ac_ciRNA_03044	0	0	0	0	0	0	0	0	0	0	0	0	0	0	0	0	0	0	0	0	0	0	0	0	0	0.170669	0.177498	0.0644487	0.0566614	0
Ac_ciRNA_03059	0	0	0	0	0	0	0.0403615	0	0	0.0425238	0	0	0	0.0632001	0	0	0	0	0	0	0	0	0	0	0.0442795	0.0426673	0.039444	0.0429658	0	0.0628316
Ac_ciRNA_03060	0	0.0450988	0	0	0.0627206	0.0995297	0	0	0.105875	0	0	0.161875	0	0	0	0	0	0	0	0	0	0	0	0	0	0.0426673	0	0	0	0
Ac_ciRNA_03063	0.0420984	0.0676482	0	0	0	0.0597178	0	0	0	0	0	0	0	0	0	0	0	0	0	0	0	0	0	0	0	0	0	0	0	0
Ac_ciRNA_03080	0	0	0	0	0	0	0	0	0	0	0	0	0	0	0	0	0	0	0	0	0	0	0	0	0	0	0	0	0.0755486	0.146607
Ac_ciRNA_03092	0	0	0.078759	0	0	0	0.0403615	0.0587955	0	0	0	0	0	0.0632001	0.0443141	0.044862	0.0613408	0.105042	0	0	0	0	0	0	0	0.0426673	0	0	0	0
Ac_ciRNA_03093	0	0	0	0	0	0	0	0	0	0	0	0	0.0642175	0	0.0443141	0.044862	0	0	0	0	0	0	0	0	0	0	0	0	0	0
Ac_ciRNA_03102	0.105246	0	0	0	0	0	0.141265	0.0587955	0.105875	0	0	0	0	0	0	0	0	0	0	0	0	0	0	0	0	0	0	0	0	0.104719
Ac_ciRNA_03103	0.126295	0.0901976	0	0	0.146348	0.437931	0	0	0	0.382715	0	0.263047	0	0	0.443141	0	0	0	0	0.123381	0	0	0	0	0.597773	0	0.335274	0.193346	0.169984	0.188495
Ac_ciRNA_03104	0	0	0	0	0	0	0	0	0	0	0.31077	0	0	0	0	0	0	0	0	0.123381	0	0.423638	0.297895	0.466096	0	0	0	0	0	0.0628316
Ac_ciRNA_03106	0	0	0	0.0399141	0	0	0	0	0	0	0	0	2.44026	1.47467	1.59531	1.70476	1.43129	1.53362	0	0	0	0	0	0	0	0	0.059166	0	0	0
Ac_ciRNA_03107	0	0	0	0	0	0	0	0	0	0	0	0	0.128435	0.147467	0.132942	0.134586	0.102235	0	0	0	0	0	0	0	0	0	0	0	0	0
Ac_ciRNA_03111	0	0	0	0	0	0	0	1.58748	1.94811	1.38202	4.56443	2.54953	0	0	0	0	0	0	8.49656	6.51863	6.09595	4.88192	4.42587	7.85704	0	0	0	0	0	0
Ac_ciRNA_03117	0	0	0	0	0	0	0	0	0	0	0	0	0.128435	0	0.155099	0.179448	0.184022	0.168068	0	0	0	0	0	0	0	0	0	0	0	0
Ac_ciRNA_03121	0.0420984	0	0	0	0	0	0.0403615	0.039197	0	0	0	0	0	0	0	0	0	0	0	0	0	0	0	0	0	0	0.039444	0.0429658	0	0.0418878
Ac_ciRNA_03122	0	0	0	0	0	0	0	0	0	0	0	0	0	0	0	0	0	0	0	0	0	0	0	0	0	0	0.059166	0	0.0566614	0.0628316
Ac_ciRNA_03125	0.0631476	0	0	0.0598712	0	0	0	0	0	0	0	0.0809374	0.0428117	0.0632001	0.0664711	0.067293	0	0.0630255	0	0	0	0	0	0.0887801	0	0	0	0	0	0
Ac_ciRNA_03128	0	0	0	0	0	0	0	0	0	0	0	0	0.0428117	0	0.0443141	0	0.0408939	0	0	0	0	0	0	0	0.0442795	0	0.039444	0.0644487	0	0
Ac_ciRNA_03131	0	0	0	0	0	0	0	0	0	0	0	0	0.599363	0.589867	0	0	0.695196	0	0	0	0	0	0	0	0	0	0	0	0	0
Ac_ciRNA_03136	0	0	0	0	0	0	0	0	0	0	0	0	0	0	0	0	0	0	0.12434	0.370143	0.214646	0.181559	0	0.332926	0	0	0	0	0	0
Ac_ciRNA_03138	0	0	0	0	0	0	0	0	0	0	0.174808	0	0	0	0	0	0	0	0.165786	0.267326	0.193181	0.201732	0	0.31073	0	0	0	0.171863	0	0
Ac_ciRNA_03139	0	0	0	0	0	0	0	0	0	0	0	0	0.214058	0.231734	0.376669	0	0	0	0.0621699	0.164508	0	0	0.127669	0.0665851	0	0	0	0	0	0
Ac_ciRNA_03142	0	0	0	0	0	0	0	0	0	0	0	0	0	0	0	0	0	0	0	0	0	0	0.106391	0.0443901	0	0	0	0	0	0
Ac_ciRNA_03143	0	0	0	0	0	0	0	0	0	0	0.174808	0.0404687	0	0	0	0	0	0	0.165786	0.575778	0.321969	0.242079	0.319173	0.288535	0	0	0	0	0	0
Ac_ciRNA_03145	0	0	0.078759	0.159657	0.104534	0	0.26235	0	0	0	0	0.222578	0	0	0	0	0	0	0	0	0	0	0	0	0	0	0.414162	0	0	0
Ac_ciRNA_03154	0	0	0	0	0	0	0	0	0	0	0	0	0	0	0	0	0	0	0	0	0.0429292	0.141213	0	0	0	0	0	0	0	0
Ac_ciRNA_03160	0	0	0	0	0	0	0	0	0	0	0	0	0.963262	0.547734	0.952752	0.583206	0.920112	1.00841	0	0	0	0	0	0	0	0	0	0	0	0
Ac_ciRNA_03163	0	0	0	0	0	0	0	0	0	0	0	0	0	0	0	0	0	0	0	0	0	0	0	0	0	0	0.039444	0.214829	0	0.146607
Ac_ciRNA_03167	0	0	0	0	0	0	0	0	0	0	0	0	0.107029	0.105333	0.0664711	0.134586	0	0.0840339	0	0	0	0	0	0	0	0	0	0	0	0
Ac_ciRNA_03175	0	0	0	0	0	0	0	0	0	0	0	0	0	0	0	0	0	0	0.0621699	0.123381	0.0643938	0	0	0.17756	0	0	0	0	0	0
Ac_ciRNA_03178	0	0	0	0	0	0	0	0	0	0	0	0	0.363899	0.147467	0	0	0	0.042017	0	0	0	0	0	0	0	0	0	0	0	0
Ac_ciRNA_03181	0	0	0	0	0.188162	0.437931	0	0	0	0	0	0	0	0	0	0	0	0	0.290126	0	0	0	0.191504	0	0	0	0	0	0	0
Ac_ciRNA_03183	0.147344	0	0.0393795	0.179614	0	0	0	0	0	0	0.233077	0.0607031	0	0	0.288041	0	0	0	0	0	0.364898	0	0	0	0	0	0	0	0	0.209439
Ac_ciRNA_03201	0	0.38334	0	0.159657	0.418137	0	0	0.548758	0	0.467762	0.602117	0	1.04889	0.695201	0	0	0	0.399161	0.37302	0	0.515151	0.463985	0.383008	0.732436	0	0	0.453606	0.794867	0	0
Ac_ciRNA_03208	0.0841968	0	0	0	0.0418137	0	0	0	0	0	0	0.0404687	0	0	0	0	0	0	0	0	0	0	0	0	0.088559	0	0.216942	0.107414	0.207759	0.209439
Ac_ciRNA_03209	2.50485	0	0	0	2.69699	4.49874	0	0	0	2.33881	0	3.96593	0	0	0	0	0	0	0	1.66564	0	0	0	0	0	0	4.96995	0	0	4.4401
Ac_ciRNA_03211	0	0	0	0	0	0	0	0.117591	0	0.10631	0	0	0	0	0	0	0	0	0.455913	1.43945	0	0.988489	0.851128	0	0	0	0	0	0	0
Ac_ciRNA_03212	0	0	0	0	0	0	0	0	0	0	0	0	0	0	0	0	0	0	1.69931	3.06396	0	2.19888	0	0	0	0	0	0	0	0
Ac_ciRNA_03213	0	0	0	0	0	0.398119	0.423796	0	0.232926	0.148833	0	0	0	0	0	0	0	0	0	0	0	0	0	0	0.642053	0.512008	0.256386	0	0	0
Ac_ciRNA_03219	0	0.0676482	0	0.0399141	0.0627206	0.119436	0.121084	0.0587955	0	0.0637858	0	0.121406	0.128435	0.147467	0.0664711	0.067293	0	0	0	0	0	0	0.0851128	0	0.0664193	0.170669	0.0986101	0.128897	0.0944357	0.104719
Ac_ciRNA_03224	0.210492	0.180395	0	0.119742	0.0836275	0	0	0	0	0	0	0	0	0	0	0	0	0	0	0	0	0	0	0	0.177118	0.128002	0	0	0	0.0628316
Ac_ciRNA_03229	0	0	0	0	0	0	0	0	0	0	0	0	0	0	0	0	0	0	0.12434	0.452397	0.0858584	0.141213	0.148947	0.110975	0	0	0	0	0	0
Ac_ciRNA_03231	0	0	0	0	0	0	0	0	0	0	0	0.182109	0	0.273867	0.243727	0.112155	0.102235	0.147059	0	0	0	0	0	0	0	0	0	0	0	0
Ac_ciRNA_03232	0	0	0	0	0	0	0	0	0	0	0	0	0	0	0	0	0	0	0	0	0	0	0.0851128	0.110975	0	0	0	0	0	0
Ac_ciRNA_03236	0	0	0	0	0	0	0	0	0	0	0	0	0	0	0	0	0	0	0	0	0	0	0	0	0.0442795	0.064001	0.453606	0.171863	0.245533	0.104719
Ac_ciRNA_03245	0	0	0	0	0	0	0	0	0	0	0	0	0	0	0	0	0	0	0	0	0	0	0	0	0.0442795	0.064001	0.138054	0	0	0.0418878
Ac_ciRNA_03248	0	0	0	0	0	0	0	0.0587955	0.0635252	0.10631	0	0.0809374	0	0	0	0	0	0	0	0	0	0	0	0	0	0	0	0	0	0
Ac_ciRNA_03251	0	0	0	0	0	0.0398119	0.0605422	0.039197	0.0635252	0.10631	0.0388462	0	0	0	0	0	0	0	0.0828932	0.041127	0.0643938	0	0.0425564	0	0	0.0426673	0.059166	0	0	0.0628316
Ac_ciRNA_03254	0	0	0	0	0	0	0	0	0	0	0.407886	0	0	0	0	0	0	0	0	0	0.643938	0.504331	0	0	0	0	0	0	0	0
Ac_ciRNA_03255	0	0	0	0	0	0	0	0	0	0	0.0582694	0	0	0	0	0	0	0	0	0	0.150252	0.201732	0	0.13317	0	0	0	0	0	0
Ac_ciRNA_03256	0	0.315691	0.236277	0.0997853	0	0.477743	0.343073	0	1.03758	0	0.563271	0	0	0	0	0	0	0	0	0.76085	0	0	0	0	0	0	0	0	0	0.900587
Ac_ciRNA_03257	0	0	0	0	0	0	0	0.156788	0.105875	0.0425238	0	0.0607031	0	0	0	0	0	0	0	0	0	0	0	0	0	0	0	0	0	0
Ac_ciRNA_03268	0.231541	0.293142	0.374105	0.578755	0.271789	0.776332	0.706326	0.0979925	0	0.148833	0	0.0607031	0	0	0	0	0	0	0	0	0	0	0	0	0.199258	0.405339	0.374718	0.322243	0.26442	0.27227
Ac_ciRNA_03271	0	0	0	0	0	0	0	0	0	0	0	0	0	0	0	0	0	0	0	0	0	0	0	0	0	0	0	0.0429658	0.0377743	0.0418878
Ac_ciRNA_03275	0	0	0	0	0	0	0	0	0	0	0	0	0	0	0	0	0	0	0	0	0	0	0	0	0	0	0.236664	0.107414	0	0
Ac_ciRNA_03276	0.0420984	0	0	0	0	0	0	0	0	0	0	0	0.0642175	0	0	0.044862	0	0	0	0	0	0	0	0	0	0	0.157776	0.0429658	0.0755486	0.0837755
Ac_ciRNA_03281	0	0	0	0	0	0	0	0	0	0	0.116539	0	0	0	0	0	0	0	0	0.185072	0	0.0605197	0.191504	0.355121	0	0	0	0	0	0
Ac_ciRNA_03285	0	0	0	0	0	0	0	0	0.0635252	0.0850477	0	0.121406	0	0	0	0	0	0	0	0	0	0	0	0	0	0	0	0	0	0
Ac_ciRNA_03288	0	0	0	0	0	0	0	0	0	0	0	0	0.0642175	0	0.0443141	0.067293	0.122682	0.042017	0	0	0	0	0	0	0	0	0	0	0	0
Ac_ciRNA_03292	0	0	0	0	0	0	0	0	0	0	0	0	0	0	0	0	0	0	0	0	0	0	0	0	0.088559	0.064001	0	0	0	0
Ac_ciRNA_03293	0.0631476	0.0901976	0.078759	0	0	0.0796238	0	0	0	0	0	0	0	0	0	0	0	0	0	0	0	0	0	0	0	0	0	0	0	0
Ac_ciRNA_03295	0.0420984	0.0450988	0	0	0	0	0	0	0	0	0	0	0	0	0	0	0	0	0	0	0	0	0	0	0	0	0	0	0	0
Ac_ciRNA_03302	0	0	0	0	0	0	0	0	0	0	0	0	0	0	0	0	0	0	0.0621699	0.308453	0.214646	0.121039	0	0	0	0	0	0	0	0
Ac_ciRNA_03305	0	0	0	0	0	0	0	0.195985	0	0	0	0.0607031	0.342493	0.105333	0.132942	0.089724	0.245363	0.147059	0.165786	0	0.128788	0.201732	0.361729	0.199755	0	0	0	0	0	0
Ac_ciRNA_03306	0	0	0	0	0	0	0	0	0	0	0.0776925	0	0	0	0	0	0	0	0.31085	0	0.193181	0.121039	0.255338	0	0	0	0	0	0	0
Ac_ciRNA_03308	0	0	0	0	0	0	0	0	0.423501	0.127572	0	0.242812	0	0	0	0	0	0	0	0	0	0	0	0	0	0	0	0	0	0
Ac_ciRNA_03322	0.126295	0	0.078759	0.0399141	0.0627206	0.119436	0.0403615	0	0	0	0	0	0	0	0	0	0	0	0	0	0	0	0	0	0.0442795	0.23467	0.236664	0.193346	0	0.0628316
Ac_ciRNA_03325	0	0	0	0	0.0627206	0	0	0	0.0423501	0.0850477	0	0.121406	0	0	0.0664711	0	0	0	0	0	0	0	0	0	0	0	0	0	0	0
Ac_ciRNA_03326	0	0	0.118138	0	0	0.119436	0.0403615	0	0.0847003	0.0850477	0.0582694	0.384453	0	0	0	0	0	0	0	0	0	0	0	0	0	0.0426673	0	0	0	0.0837755
Ac_ciRNA_03328	0	0	0	0	0	0.0398119	0.0403615	0	0	0	0	0	0	0	0.0443141	0.067293	0.0817877	0	0	0	0	0.0605197	0	0.0443901	0	0.106668	0.0788881	0.0644487	0	0.125663
Ac_ciRNA_03331	0	0	0	0	0	0	0	0	0	0	0.0388462	0	0	0	0	0	0	0	0	0	0	0.0403465	0.0425564	0.0443901	0	0	0	0	0	0
Ac_ciRNA_03332	0	0	0	0	0	0	0.0403615	0	0	0	0	0	0	0	0	0	0	0	0	0	0	0	0	0	0	0.0853346	0.0788881	0.0644487	0.0566614	0
Ac_ciRNA_03333	0	0	0	0	0	0	0.0403615	0	0	0	0	0	0	0	0	0	0	0	0	0	0	0	0	0	0	0	0	0	0.0377743	0.0418878
Ac_ciRNA_03345	0	0	0	0	0	0	0	0	0	0	0	0	0	0	0	0	0	0	0	0	0	0	0	0	0	0	0.039444	0.0429658	0.0377743	0
Ac_ciRNA_03349	0	0	0	0	0	0.0398119	0	0	0	0	0	0	0	0	0	0	0	0	0	0	0	0	0	0	0.177118	0.128002	0	0.193346	0	0.146607
Ac_ciRNA_03350	0	0	0	0	0	0	0	0	0	0.0425238	0	0	0	0.1264	0.0886281	0.157017	0	0	0	0	0	0	0	0	0	0	0	0	0	0
Ac_ciRNA_03368	0	0	0.0590692	0	0	0	0.080723	0.039197	0	0.0425238	0	0.121406	0	0	0	0	0	0	0	0	0	0	0	0	0	0	0	0	0.0566614	0
Ac_ciRNA_03371	0	0	0	0	0	0	0	0.078394	0.0847003	0.0425238	0	0.14164	0	0	0	0	0	0	0	0	0	0	0	0	0	0	0	0	0	0
Ac_ciRNA_03372	0	0	0	0	0	0.0796238	0	0	0	0	0	0	0	0	0.22157	0.201879	0	0	0	0	0	0	0.0638346	0	0	0	0	0	0	0
Ac_ciRNA_03376	0	0	0	0.0399141	0	0	0.0403615	0	0	0	0.0971156	0	0.192652	0	0	0	0.163575	0.042017	0	0	0.107323	0	0	0.0443901	0	0	0	0	0	0
Ac_ciRNA_03379	0	0	0	0	0	0.0597178	0	0	0.0847003	0	0	0.0809374	0.299682	0.1896	0.243727	0.269172	0.286257	0.168068	0	0	0	0	0	0	0.0442795	0.106668	0.512772	0	0	0
Ac_ciRNA_03384	0	0	0	0	0	0	0	1.56788	0	0	0.776925	0	0.492334	0	0.199413	0.515913	0	0	0	0	0.0429292	0	0	0	0	0	0	0	0	0
Ac_ciRNA_03389	0	0	0	0	0	0	0	0	0	0	0	0	0	0.0421334	0.0664711	0.134586	0.184022	0	0	0	0	0	0	0	0	0	0	0	0	0
Ac_ciRNA_03390	0.0420984	0.0450988	0	0.0399141	0.0627206	0	0.121084	0.0979925	0.0423501	0.0637858	0.174808	0.14164	0.342493	0.2528	0.265884	0.067293	0.163575	0.168068	0.352296	0.143945	0.236111	0	0.148947	0.155365	0.0664193	0.170669	0.039444	0	0	0
Ac_ciRNA_03391	0	0	0	0	0	0	0	0	0	0	0	0	0.0428117	0	0.0664711	0.089724	0.102235	0.0840339	0	0	0	0	0	0	0	0	0	0	0	0
Ac_ciRNA_03393	0	0	0	0	0	0	0	0	0	0	0	0	0	0	0	0	0	0	0	0	0	0	0	0	0	0	0.039444	0.0429658	0	0.0418878
Ac_ciRNA_03397	0	0	0	0	0	0	0	0	0	0	0	0	0	0	0	0	0	0	0	0	0	0	0	0	0	0	0.177498	0.128897	0.0944357	0.125663
Ac_ciRNA_03405	0	0	0	0	0	0	0	0	0	0	0	0	0.128435	0.0421334	0.0664711	0.044862	0	0.042017	0	0	0	0	0	0	0	0	0	0	0	0
Ac_ciRNA_03414	0	0	0	0	0	0	0	0	0	0	0	0	0	0	0	0	0	0	0	0	0	0.342945	0.255338	0.288535	0	0	0	0	0	0
Ac_ciRNA_03415	0	0	0	0	0	0	0	0	0	0	0.679809	0	1.22013	0.779467	0.775496	0.829947	1.14503	0.903365	0.435189	0.987049	0.493686	0.706063	0.46812	0.799021	0	0	0	0	0	0
Ac_ciRNA_03417	0	0	0	0	0	0	0	0	0	0	0.0971156	0.202344	0.535146	0.231734	0	0	0.26581	0	0	0	0.171717	0.403465	0.148947	0.332926	0	0	0	0.81635	0	0
Ac_ciRNA_03421	0	0	0	0	0	0	0	0	0	0	0	0	0	0	0.0443141	0	0.0408939	0.042017	0	0	0	0	0	0	0	0	0	0	0	0
Ac_ciRNA_03425	0	0	0	0	0	0	0	0	0	0	0	0	0	0	0	0	0	0	0	0	0	0	0.0425564	0.0443901	0	0	0	0	0	0
Ac_ciRNA_03426	0	0	0	0	0	0	0	0	0	0	0	0	0.171247	0.0632001	0.22157	0.112155	0.0817877	0.105042	0	0	0	0	0	0	0	0	0	0	0	0
Ac_ciRNA_03433	0	0	0	0	0	0	0	0	0	0	0	0	0	0	0.0443141	0.044862	0	0	0	0	0	0	0	0	0	0	0	0	0	0
Ac_ciRNA_03444	0	0	0.72852	0	0	0	0	0	0	0	0	0	2.67573	1.60107	0	3.1852	0	0	0	0	0	0	0	0	0	0	0	0	0	0
Ac_ciRNA_03445	0	0	0	0	0	0	0	0	0	0	0	0	0.0642175	0.0842667	0.0886281	0	0	0	0	0	0	0	0	0	0	0	0	0	0	0
Ac_ciRNA_03450	0	0	0	0	0	0	0	0.0979925	0.0423501	0.148833	0	0	0	0	0	0	0	0	0	0	0	0	0	0	0	0	0	0	0	0
Ac_ciRNA_03458	0	0	0	0	0	0	0	0	0	0	0	0	0	0.0421334	0.0664711	0	0.0408939	0.105042	0	0	0	0	0	0	0	0	0	0	0	0
Ac_ciRNA_03459	0	0	0	0	0	0	0	0	0	0	0	0	0.0856233	0.0421334	0.132942	0	0.0613408	0	0	0	0	0	0	0	0	0	0	0	0	0
Ac_ciRNA_03460	0	0	0	0	0	0	0	0	0	0	0	0	0.25687	0.0842667	0.177256	0.269172	0.184022	0.105042	0	0	0	0	0	0	0	0	0	0	0	0
Ac_ciRNA_03462	0	0	0	0	0	0	0	0	0	0	0	0	0	0	0	0	0	0	0	0	0	0	0	0	0	0	0.0986101	0.0644487	0	0.0418878
Ac_ciRNA_03465	0	0	0	0	0	0	0	0	0	0	0	0	0.385305	0.231734	0.642554	0.426189	0.388492	0.42017	0	0	0	0	0	0	0	0	0	0	0	0
Ac_ciRNA_03468	0	0	0	0	0	0	0	0	0	0	0	0	0.128435	0.168533	0.110785	0.112155	0.0613408	0.252102	0	0	0	0	0	0	0	0	0	0	0	0
Ac_ciRNA_03469	0	0	0	0	0	0	0	0	0	0	0	0	0.107029	0.294934	0.110785	0	0.102235	0.042017	0	0	0	0	0	0	0	0	0	0	0	0
Ac_ciRNA_03473	0	0	0	0	0	0	0.080723	0	0	0	0	0	0	0	0	0	0	0	0	0	0	0	0	0	0.110699	0.106668	0.39444	0.236312	0.113323	0.356046
Ac_ciRNA_03479	0	0	0	0	0	0	0	0	0	0	0	0	0	0	0	0	0	0	0	0	0	0	0	0	0	0	0	0	0.0377743	0.0418878
Ac_ciRNA_03481	0	0	0	0	0	0	0	0	0	0	0	0	0	0.0842667	0.0664711	0	0.0408939	0.0630255	0	0	0	0	0	0	0	0	0	0	0	0
Ac_ciRNA_03482	0	0	0	0	0	0	0	0	0	0	0	0	0.149841	0.0632001	0.155099	0	0.102235	0.0840339	0	0	0	0	0	0	0	0	0	0	0	0
Ac_ciRNA_03486	0	0	0	0	0	0	0	0	0	0	0	0	0.0856233	0.0842667	0	0.044862	0	0	0	0	0	0	0	0	0	0	0	0	0	0
Ac_ciRNA_03491	0	0	0	0	0	0	0	0	0.0423501	0.0425238	0	0.0404687	0	0	0	0	0	0	0	0	0	0	0	0	0	0	0	0	0	0
Ac_ciRNA_03498	0	0	0	0	0	0	0	0	0	0	0	0	0.149841	0	0.110785	0.067293	0	0.0630255	0	0	0	0	0	0	0	0	0	0	0	0
Ac_ciRNA_03505	0	0	0.0393795	0	0.0418137	0	0	0	0	0	0	0	0.214058	0.0842667	0	0	0	0.042017	0	0	0	0	0	0	0	0	0.118332	0.0644487	0	0
Ac_ciRNA_03506	0.0420984	0.0676482	0	0.0598712	0.0627206	0.0597178	0	0	0.0847003	0	0.0582694	0	0.192652	0.168533	0.243727	0.471051	0.347598	0.210085	0.0414466	0	0.128788	0.0403465	0	0	0.0664193	0.170669	0.039444	0	0	0
Ac_ciRNA_03518	0.105246	0.0901976	0	0.0399141	0.627206	0.218965	0.242169	0.176387	0.254101	0.4465	0.31077	0.222578	1.02748	0.674134	0.59824	0.695361	1.22682	0.504204	0.269403	0.843104	0.150252	0.201732	0.361729	1.24292	1.30625	0.341338	0	0.236312	0	0.167551
Ac_ciRNA_03525	0	0	0	0.0399141	0	0	0.0403615	0	0	0	0	0	0	0	0	0	0	0	0	0	0	0	0	0	0	0.0426673	0.0788881	0.128897	0	0
Ac_ciRNA_03530	0	0	0	0.0598712	0	0	0	0	0	0	0	0.0404687	0.0856233	0.0632001	0	0.157017	0.0408939	0.0840339	0	0	0	0	0	0	0.0442795	0.0426673	0.0788881	0.0429658	0.0566614	0.0628316
Ac_ciRNA_03535	0	0	0	0	0	0	0	0	0	0	0.155385	0	0	0	0	0.044862	0	0	0	0.740286	0	0	0	0	0	0	0.414162	0.708936	0	0
Ac_ciRNA_03539	0	0	0	0	0	0	0	0	0.0635252	0.10631	0	0.14164	0	0	0	0	0	0	0	0	0	0	0	0	0	0	0	0	0	0
Ac_ciRNA_03540	0	0	0	0.0399141	0.0836275	0.0398119	0	0.195985	0.169401	0.212619	0.0388462	0.121406	0	0	0	0	0.0408939	0	0.0414466	0	0	0	0	0	0.0442795	0.0426673	0.0788881	0.107414	0.0566614	0.0628316
Ac_ciRNA_03549	0	0	0	0	0	0	0	0	0	0	0	0	0.0642175	0.0842667	0	0	0	0.105042	0	0	0	0	0	0	0	0	0	0	0	0
Ac_ciRNA_03551	0.610427	0.879426	0.393795	0.439055	0.627206	1.43323	0.847591	1.41109	1.29168	0.616596	1.35962	0.991483	2.07637	0	1.48452	0	2.53542	1.63866	0	1.33663	1.45959	0	0	1.37609	2.52393	3.32805	1.59748	1.54677	1.15212	1.42418
Ac_ciRNA_03554	0	0	0.0590692	0.0399141	0.0627206	0.0398119	0.0403615	0	0.0635252	0.0425238	0	0.0404687	0	0	0	0.067293	0	0	0	0	0	0	0	0	0	0.064001	0	0	0.0566614	0
Ac_ciRNA_03558	0	0	0	0	0	0	0	0	0	0	0	0	0.0642175	0	0	0	0.0408939	0	0	0.041127	0.0858584	0.100866	0	0.554876	0	0	0	0	0	0
Ac_ciRNA_03564	0	0	0	0	0	0	0	0	0	0	0	0	0.107029	0.0842667	0.0664711	0.067293	0.102235	0.189076	0	0	0	0	0	0	0	0	0	0	0	0
Ac_ciRNA_03568	0	0	0	0	0	0	0	0	0	0	0.31077	0	0	0	0	0	0	0	0.269403	1.11043	0.27904	0.504331	0.851128	0.732436	0	0	0	0	0	0
Ac_ciRNA_03569	0	0	0	0	0	0	0	0	0	0	0	0	0	0	0	0	0	0	0	0	0.0858584	0.302599	0.404286	0.31073	0	0	0	0	0	0
Ac_ciRNA_03575	0.168394	0.248043	0.177208	0.279399	0.585392	1.09483	0.867772	0.666349	0.614077	0.382715	0.505001	0.829609	0.470928	0.210667	0.465298	1.03183	1.16548	0.756305	0	0	0	0	0	0	1.63834	1.21602	0.867769	0.386692	0.26442	0.209439
Ac_ciRNA_03576	0	0	0	0	0	0	0	0	0	0	0.0388462	0	0.0642175	0.0421334	0	0	0.0408939	0.0840339	0	0	0	0	0	0	0	0	0	0	0	0
Ac_ciRNA_03584	0	0	0	0	0	0	0	0.039197	0.0847003	0.10631	0.0388462	0.343984	0	0	0	0	0	0	0	0	0	0	0	0	0	0	0	0	0	0
Ac_ciRNA_03586	0	0	0	0	0	0	0	0	0	0	0	0	0.0856233	0	0	0	0.0408939	0.0630255	0	0	0	0	0	0	0	0	0	0	0	0
Ac_ciRNA_03590	0	0	0.984487	0.997853	0	0	2.88585	0	0	0.382715	0	0.728437	0	0	0	0.157017	0	0	0	0	0	0	0	0	0	0	0	0	0	0
Ac_ciRNA_03591	0	0	0	0	0	0	0	0	0	0	2.66097	0	3.48915	1.68533	2.10492	3.81327	7.29956	3.7185	1.82365	5.71666	2.76893	2.40062	2.10654	3.95072	0	0	0	0	0	0
Ac_ciRNA_03596	0	0	0	0	0	0	0	0	0	0	0	0	0.941857	0.5056	0.354512	0.695361	0.286257	0.105042	0	0.0822541	0	0	0.0851128	0	0	0	0	0	0	0
Ac_ciRNA_03598	0	0	0	0	0.0836275	0.0398119	0	0	0	0	0	0	0	0	0	0	0	0	0	0	0	0	0	0	0	0.0426673	0	0	0	0
Ac_ciRNA_03599	0	0	0	0	0	0	0	0	0	0	0.271924	0	0.899045	0	0.930595	0.919671	1.41084	0.987399	0.207233	0.514088	0	0	0.191504	0	0	0	0	0	0	0
Ac_ciRNA_03602	0	0	0	0	0	0	0	0	0	0	0	0	0.0642175	0.0632001	0	0.067293	0	0	0	0	0	0	0	0	0	0	0	0	0	0
Ac_ciRNA_03605	0.442033	0.270593	0.255967	0.159657	0.710834	0.238871	0.80723	0.156788	0.211751	0.170095	0	0.222578	0.25687	0.168533	0.22157	0.134586	0.0817877	0.147059	0	0	0	0	0	0	0	0	0	0	0.0755486	0.0418878
Ac_ciRNA_03625	0	0.0901976	0.0393795	0	0.0418137	0.0796238	0.201807	0.13719	0.148225	0.0850477	0	0.101172	0	0	0	0	0	0	0	0	0	0	0	0	0.088559	0.128002	0.059166	0.107414	0	0.0628316
Ac_ciRNA_03628	0	0	0	0	0	0	0.0605422	0	0	0	0	0	0	0.0421334	0.0664711	0.044862	0	0	0	0	0	0	0	0	0	0	0	0	0	0
Ac_ciRNA_03629	0	0	0	0	0	0	0	0	0	0	0.174808	0	0	0	0	0	0	0	0.103617	0.34958	0	0.201732	0.191504	0.17756	0	0	0	0	0	0
Ac_ciRNA_03633	0.105246	0	0.0590692	0.0598712	0	0	0	0.039197	0.0847003	0	0	0	0	0	0	0	0	0	0	0	0	0	0	0	0	0	0	0.322243	0	0
Ac_ciRNA_03635	0	0	0	0	0	0	0	0	0	0	0	0	0	0	0	0	0	0	0	0	0	0	0	0	0	0	0	0	0.0566614	0.125663
Ac_ciRNA_03640	0	0	0	0	0	0	0	0	0	0	0	0	0	0	0	0.044862	0.0613408	0.042017	0	0	0	0	0	0	0	0	0	0	0	0
Ac_ciRNA_03641	0	0	0	0	0	0	0	0	0	0	0	0	0	0	0.0664711	0.134586	0	0	0	0.0616905	0	0	0	0.0443901	0	0	0	0	0	0
Ac_ciRNA_03642	0	0	0	0	0	0	0	0	0	0	0	0	0	0	0	0	0	0	0	0	0.150252	0	0.276617	0.13317	0	0	0	0	0	0
Ac_ciRNA_03644	0	0	0	0	0	0	0	0	0	0	0	0	0	0	0	0	0.0613408	0.042017	0	0	0	0	0	0	0	0	0	0	0	0
Ac_ciRNA_03647	0.189443	0.315691	0.275656	0.199571	0.33451	0.656896	0	0.411569	0.444676	0.531548	0.135962	0.526093	0	0	0	0	0	0	0	0	0	0	0	0	0.952009	1.13068	0.907213	0.601521	0.755486	0.481709
Ac_ciRNA_03650	0	0	0	0	0	0	0	0	0	0	0	0	0	0	0	0	0	0	0	0	0.128788	0.201732	0.170226	0.199755	0	0	0	0	0	0
Ac_ciRNA_03656	0.105246	0.0676482	0.0393795	0	0	0.0597178	0.141265	0.195985	0.105875	0.0850477	0.0388462	0.121406	0.149841	0.105333	0.0664711	0.157017	0.102235	0.0630255	0	0.0616905	0	0.121039	0.0425564	0	0.0442795	0	0	0	0	0
Ac_ciRNA_03658	0.0841968	0.0450988	0	0	0	0.0597178	0	0	0	0	0	0	0	0	0	0	0	0	0	0	0	0	0	0	0.0442795	0.0426673	0	0	0	0
Ac_ciRNA_03660	0	0	0	0	0	0	0	0	0	0	0.291347	0	0	0	0	0	0.224916	0	0.518083	0.925358	0.364898	0.504331	0.23406	0.17756	0	0	0	0	0	0
Ac_ciRNA_03672	0	0	0	0	0	0.119436	0	0	0	0	0	0	0	0	0	0	0	0	0	0	0	0	0	0	0.265677	0.213337	0	0.0644487	0	0.146607
Ac_ciRNA_03675	0	0	0	0	0	0	0.0403615	0.0587955	0	0	0	0	0	0	0	0	0	0	0	0	0	0	0	0	0	0	0	0	0	0
Ac_ciRNA_03677	0	0	0	0	0	0	0	0	0	0	0	0	0.0428117	0	0	0.067293	0.0408939	0.0840339	0	0	0	0	0	0	0	0	0.0986101	0	0	0
Ac_ciRNA_03679	0	0	0	0	0	0	0	0	0	0	0	0	0	0	0	0	0	0	0.103617	0	0.407828	0.463985	0.23406	0.13317	0	0	0	0	0	0
Ac_ciRNA_03680	0	0	0	0	0	0	0	0	0	0	0.0582694	0	0	0	0	0	0	0	0.0414466	0.041127	0	0	0	0	0	0	0	0	0	0
Ac_ciRNA_03682	0	0	0	0	0	0.119436	0.080723	0	0.0847003	0.0850477	0	0.14164	0	0	0	0	0	0	0	0	0	0	0	0	0	0	0	0	0	0
Ac_ciRNA_03683	0.126295	0	0	0.0598712	0.0627206	0.159248	0	0	0.12705	0	0	0.121406	0	0	0	0	0	0	0	0	0	0	0	0	0.221398	0.23467	0	0.0859316	0	0.251327
Ac_ciRNA_03684	0	0	0	0	0	0	0	0	0	0	0	0	0	0	0	0.314034	0.26581	0.147059	0	0	0	0	0	0	0	0	0	0	0	0
Ac_ciRNA_03690	0	0	0	0	0	0	0	0	0	0	0.738079	0	0	0	0	0	0	0	0.704592	1.08987	0.901514	1.02884	0.957519	0.665851	0	0	0	0	0	0
Ac_ciRNA_03696	0	0	0	0	0	0	0	0	0.275276	0	0.369039	0	0	0	0	0	0	0	0.145063	0.390707	0.150252	0.181559	0.361729	0.532681	0	0	0	0	0	0
Ac_ciRNA_03701	0.168394	0.315691	0	0.199571	0.188162	0.63699	0	0.235182	0	0	0	0	0.192652	0.0421334	0.132942	0.179448	0.552067	0.126051	0	0.185072	0	0	0	0	0.90773	0.810679	0	0.751901	0	0.586429
Ac_ciRNA_03704	0.105246	0	0	0	0	0	0	0	0	0	0	0	0	0	0	0	0	0	0	0	0.193181	0	0	0	0	0	0.236664	0.107414	0.188871	0
Ac_ciRNA_03710	0	0	0	0	0	0	0	0.039197	0.0847003	0.0850477	0	0	0	0	0	0	0	0	0	0	0	0	0	0	0	0	0	0	0	0
Ac_ciRNA_03711	0	0	0.177208	0.199571	0	0	0.161446	0	0	0	0	0	0	0	0	0.44862	0	0	0	0	0.236111	0	0	0	0	0	0.216942	0	0	0
Ac_ciRNA_03713	0	0	0	0	0	0	0	0	0	0	0.155385	0	0	0	0	0	0	0	0.31085	0.390707	0.300505	0.524504	0.23406	0.244145	0	0	0	0	0	0
Ac_ciRNA_03714	0	0	0	0	0	0	0	0	0	0.10631	0	0	0.663581	0.969068	0.487455	0.426189	0.511173	0.42017	0	0	0	0	0	0	0	0	0	0	0	0
Ac_ciRNA_03720	0	0	1.87053	0	0	0	0	0	0	0	0	0	0	0.632001	1.44021	5.09184	0	1.28152	0.393743	0.719723	0.450757	0.927969	2.08526	5.94827	0	0	0	0	0	0
Ac_ciRNA_03721	0.27364	0	0	0	0	0	0	0	0	0	0	0	0	0	0	0	0	0	0.497359	1.56283	0.987372	0	0	5.43778	0	0	0	0	0	0
Ac_ciRNA_03729	0	0	0	0	0	0	0	0	0	0	0	0	0	0	0	0	0	0	0	0	0.0429292	0.0403465	0	0	0	0	0	0	0	0
Ac_ciRNA_03732	0	0	0	0	0	0	0.080723	0	0.0423501	0	0	0	0.0642175	0.105333	0.199413	0.067293	0.102235	0	0	0	0	0	0	0	0	0	0	0.107414	0	0
Ac_ciRNA_03737	0	0	0	0	0	0.53746	0	0	0.381151	0.403976	0	0	0	0	0	0	0	0	0	0	0	0	0	0	0	0	0	0	0	0
Ac_ciRNA_03740	0	0	0	1.07768	0	0	0	0	0	0	0	4.16828	0	0	0	3.92543	7.0133	3.59245	0	0	0	0	0	0	0	4.2454	0	0	0	0
Ac_ciRNA_03745	0	0	0	0	0	0	0	0.0979925	0	0	0.446732	0.202344	0	0	0	0.22431	0	0	0	0	0	0	0	0	0	0	0	0	0.169984	0
Ac_ciRNA_03749	0.0420984	0	0	0	0.0627206	0	0	0	0	0	0	0	0	0	0	0	0	0	0	0	0	0	0	0	0.088559	0.064001	0	0	0	0
Ac_ciRNA_03758	0	0	0	0	0	0.0995297	0	0	0	0.0425238	0	0	0	0	0	0	0	0	0	0	0	0	0	0	0.154978	0.106668	0.29583	0.472624	0.245533	0.209439
Ac_ciRNA_03759	0	0	0.157518	0	0	0	0	0.176387	0.0847003	0.170095	0	0.424921	0	0	0	0	0	0	0	0	0	0	0	0	0	0	0.177498	0	0.0377743	0
Ac_ciRNA_03766	0.757771	0.496087	0	0.638626	0.459951	0.955485	0	0	0	0	0	0	0	0	0	0	0	0	0	0	0	0	0	0	2.1697	2.38937	0	4.03878	0	3.9165
Ac_ciRNA_03769	0	0	0	0	0	0	0	0	0	0	0	0	0	0	0	0	0.0408939	0.042017	0	0	0	0	0	0	0	0	0	0	0	0
Ac_ciRNA_03776	0.0631476	0.0901976	0	0	0.0418137	0.0398119	0.0403615	0	0.0635252	0.0637858	0	0.0404687	0.107029	0.0421334	0.0664711	0	0	0	0.0414466	0	0.0429292	0.141213	0	0.0887801	0	0.128002	0.256386	0.322243	0.26442	0.230383
Ac_ciRNA_03779	0	0	0	0	0	0	0	0	0	0.0637858	0	0.0607031	0	0	0	0	0	0	0	0	0	0	0	0	0	0	0.216942	0.107414	0.0377743	0.0418878
Ac_ciRNA_03787	0	0	0	0	0.0418137	0.0398119	0	0	0	0	0	0	0	0	0	0	0	0	0.12434	0.102818	0	0.0403465	0	0	0.088559	0	0	0	0.0566614	0
Ac_ciRNA_03789	0	0	0	0	0	0	0	0	0	0	0	0	0	0	0	0	0	0	0	0	0	0	0	0	0.0442795	0.0853346	0	0	0	0
Ac_ciRNA_03791	0	0	0	0	0	0	0	0	0	0	0	0	0.0856233	0.168533	0.0886281	0.067293	0.0817877	0.0630255	0	0	0	0	0	0	0	0	0	0	0	0
Ac_ciRNA_03800	0	0	0	0	0	0	0	0	0	0	0	0	0	0	0.0664711	0	0	0.042017	0	0	0	0	0	0	0.088559	0.106668	0	0.0859316	0.26442	0.167551
Ac_ciRNA_03806	0	0	0	0	0	0	0	0	0	0	0	0	0	0	0	0	0	0	0	0	0	0	0	0.31073	0.797031	0.384006	0	0.408175	0	0
Ac_ciRNA_03813	0	0.0450988	0	0.139699	0.0627206	0.179153	0.0605422	0	0	0	0	0	0	0	0	0	0	0	0	0	0	0	0	0	0.177118	0.426673	0.039444	0.730418	0	1.08908
Ac_ciRNA_03814	0	0	0	0	0	0	0	0	0	0	0	0	0	0	0	0	0	0	0	0	0	0	0	0	0	0	0	0	0.0755486	0.921531
Ac_ciRNA_03815	0.0631476	0.112747	0	0.139699	0	0.298589	0.080723	0	0	0	0	0	0	0	0	0	0	0	0	0	0	0	0	0	0.132839	0.405339	0.177498	0.601521	0.0944357	1.61268
Ac_ciRNA_03825	0	0	0.177208	0	0	0	0	0.313576	0	0	0	0	0.192652	0	0.177256	0.291603	0.490726	0	0	0	0.83712	0	0	0	0	0	0	0	0	0
Ac_ciRNA_03828	0	0	0	0	0	0	0	0	0	0	0	0	0.492334	0.2528	0.110785	0.381327	0.470279	0.105042	0	0	0	0	0	0	0	0	0	0	0	0
Ac_ciRNA_03830	0	0	0	0	0	0	0	0	0	0	0.135962	0	0	0	0	0	0	0	0.145063	0.143945	0.128788	0.383292	0.0425564	0.22195	0	0	0	0	0	0
Ac_ciRNA_03831	0	0	0	0	0	0	0	0	0	0	0	0	0	0	0	0	0	0	0.207233	0.308453	0.171717	0.363118	0.255338	0	0	0	0	0	0	0
Ac_ciRNA_03832	0	0	0	0	0	0	0	0	0	0	0.252501	0	0	0	0	0	0	0	0.145063	0	0.171717	0.262252	0.446842	0.332926	0	0	0	0	0	0
Ac_ciRNA_03835	0	0	0	0	0	0	0	0	0	0	0	0	0	0.0842667	0.0664711	0	0.0817877	0.105042	0	0	0	0	0	0	0	0	0	0	0	0
Ac_ciRNA_03836	0	0	0	0	0	0	0	0	0	0	0	0	0	0	0	0	0	0	0.0414466	0.041127	0	0	0	0.0443901	0	0	0	0	0	0
Ac_ciRNA_03840	0	0	0	0	0	0	0.121084	0	0	0	0	0	0	0	0	0	0	0	0	0	0	0	0	0	0.0442795	0.128002	0.0788881	0	0	0.0837755
Ac_ciRNA_03843	0	0	0.295346	0	0	0	0	0.156788	0.444676	0.489024	0.0582694	0.404687	0	0	0	0	0	0	0	0	0	0	0	0	0	0	0.433884	0	0.623276	0
Ac_ciRNA_03854	0	0	0	0	0	0	0	0	0	0	0	0	0.171247	0.294934	0.310198	0.403758	0.184022	0.27311	0	0	0	0	0	0	0	0	0	0	0.113323	0
Ac_ciRNA_03855	0	0	0	0	0	0	0	0	0	0	0	0	1.24154	1.15867	1.32942	0.964533	0.633855	0.42017	0	0	0	0	0	0	0	0	0.354996	0	0.0944357	0
Ac_ciRNA_03862	0	0	0	0	0	0	0	0	0	0	0	0	0	0	0	0	0	0	0	0	0	0	0	0	0	0	0.039444	0.0214829	0	0
Ac_ciRNA_03879	0	0	0	0	0	0	0	0	0	0	0	0	0.492334	0.2528	0.553926	0.493482	0	0.588238	0	0	0	0	0	0	0	0	0	0	0	0
Ac_ciRNA_03883	0	0	0	0	0	0	0	0.0587955	0	0	0	0	0	0	0	0	0	0	0	0	0	0	0	0	0.0442795	0.0426673	0	0	0	0
Ac_ciRNA_03890	0	0	0	0	0	0	0	0	0.105875	0.0425238	0	0	0	0	0	0	0	0	0	0	0	0	0	0	0	0	0	0	0	0
Ac_ciRNA_03896	0	0	0	0	0	0	0	0	0	0	0.155385	0	0	0	0	0	0	0	0.0828932	0.370143	0.0858584	0.201732	0.127669	0.110975	0	0	0	0	0	0
Ac_ciRNA_03899	0	0	0.0984487	0	0.0418137	0.0398119	0	0	0	0	0	0	0	0	0	0	0	0	0	0	0	0	0	0	0	0	0	0	0	0
Ac_ciRNA_03908	0	0	0	0	0	0	0	0	0	0	0	0	0.0856233	0.0842667	0	0	0	0	0	0	0	0.0403465	0	0	0	0	0	0	0	0
Ac_ciRNA_03916	0	0	0.0393795	0	0	0	0	0	0	0	0	0	0	0	0	0	0	0	0.0414466	0.0822541	0	0	0	0	0	0	0	0	0	0
Ac_ciRNA_03925	0	0	0	0	0	0	0	0	0	0	0.0971156	0	0	0	0	0	0	0	0.0828932	0.164508	0.107323	0.100866	0.276617	0.0443901	0	0	0	0	0	0
Ac_ciRNA_03927	0	0	0	0	0	0	0	0	0	0	0.0582694	0	0	0	0	0	0	0	0.0828932	0.102818	0.128788	0.161386	0.191504	0.0443901	0	0	0	0	0	0
Ac_ciRNA_03928	0	0	0	0	0	0	0	0	0.0423501	0	0	0	0.235464	0.1264	0.177256	0.179448	0	0.168068	0	0	0	0	0	0	0	0	0	0	0	0
Ac_ciRNA_03935	0	0	0	0	0	0	0	0	0	0	0	0	0.0214058	0	0.022157	0.022431	0.0204469	0	0	0	0	0	0	0	0	0	0	0	0	0
Ac_ciRNA_03936	0	0	0	0	0	0	0	0	0	0	0	0	0.0856233	0.0632001	0	0	0	0.0840339	0	0	0	0	0	0	0	0	0	0	0	0
Ac_ciRNA_03937	0	0	0	0	0	0	0	0	0	0	0	0	0	0	0.310198	0.336465	0.122682	0.0630255	0	0	0	0	0	0	0	0	0	0	0	0
Ac_ciRNA_03941	0	0	0.137828	0	0	0	0	0.0979925	0.105875	0.0637858	0	0.0404687	0	0	0	0	0	0	0	0	0	0	0	0	0	0	0	0	0	0
Ac_ciRNA_03949	0	0	0	0	0	0	0	0	0	0	0	0	0	0	0	0	0	0	0	0	0	0.0605197	0.0851128	0.0443901	0	0	0	0	0	0
Ac_ciRNA_03952	0	0	0	0	0	0	0	0	0	0	0	0	0	0	0	0	0	0	0	0	0	0	0	0	0.0664193	0	0.039444	0.0429658	0	0
Ac_ciRNA_03956	0.126295	0.0676482	0	0.0598712	0	0.179153	0	0	0	0	0	0	0	0	0	0	0	0	0	0	0	0	0	0	0	0	0	0	0.188871	0.0628316
Ac_ciRNA_03957	0	0	0	0	0	0	0	0.117591	0.0635252	0.0637858	0.427309	0.0809374	0	0	0	0	0	0	0.165786	0.205635	0.0643938	0.161386	0.276617	0.355121	0	0	0	0	0	0
Ac_ciRNA_03958	0	0	0	0	0	0	0	0	0	0	0	0	0	0	0	0	0	0	0.0621699	0.041127	0.0858584	0.100866	0.0425564	0	0	0	0	0	0	0
Ac_ciRNA_03960	0	0	0	0	0	0	0	0	0	0	0	0.0404687	0	0	0	0	0	0	0.0414466	0.0616905	0	0	0	0	0	0	0	0	0	0
Ac_ciRNA_03967	0	0	0	0	0	0	0.0403615	0	0	0	0	0	0	0	0	0	0	0	0	0	0	0	0	0	0	0	0	0	0.0755486	0.104719
Ac_ciRNA_03972	0	0	0	0	0	0	0	0.117591	0.0847003	0.0637858	0	0.0404687	0	0	0	0	0	0	0	0	0	0	0	0	0	0	0	0	0	0
Ac_ciRNA_03981	0	0	0	0	0	0	0	0	0	0	0	0	0	0	0	0	0	0	0	0	0	0	0	0	0	0	0.039444	0.0644487	0	0.0418878
Ac_ciRNA_03987	0	0	0	0	0	0	0	0	0	0	0	0	0.834827	1.28507	0.576083	0	0.79743	0.441178	0	0	0	0	0	0	0	0	0	0	0	0
Ac_ciRNA_03993	0	0	0	0	0	0	0	0	0	0	0	0	0	0	0	0	0	0	0.227956	0.226199	0.0643938	0.221906	0.23406	0.110975	0	0	0	0	0	0
Ac_ciRNA_03995	0	0	0	0	0	0	0	0	0	0	0.116539	0	0	0	0	0	0	0	0.0828932	0	0.107323	0.262252	0	0.26634	0	0	0	0	0	0
Ac_ciRNA_04002	0	0	0	0	0	0	0	0	0	0	0	0	0	0	0.0886281	0.067293	0	0	0	0	0	0	0	0	0	0	0	0	0	0
Ac_ciRNA_04005	0	0	0	0	0	0	0	0	0	0	0	0	0.0856233	0.294934	0.0664711	0.089724	0	0	0	0	0	0	0	0	0	0	0	0	0	0
Ac_ciRNA_04006	0	0	0	0	0	0	0	0	0	0	0	0	0.684987	0.737334	0.0886281	0.179448	0.0817877	0.210085	0	0	0	0	0	0	0	0	0	0	0	0
Ac_ciRNA_04007	0	0	0	0	0	0	0	0	0	0	0	0	0.0428117	0.105333	0	0	0	0	0	0	0	0	0	0	0	0	0	0	0	0
Ac_ciRNA_04010	0	0	0	0	0	0	0	0	0	0	0	0	0.128435	0.2528	0	0	0	0	0	0	0	0	0	0	0	0	0	0	0	0
Ac_ciRNA_04011	0	0	0	0	0	0	0	0	0	0	0	0	0.0856233	0.168533	0	0	0.0408939	0	0	0	0	0	0	0	0	0	0	0	0	0
Ac_ciRNA_04012	0	0	0	0	0	0	0	0	0	0	0	0	0.706392	0.758401	0.398826	0.403758	0.449833	0.525212	0	0	0	0	0	0	0	0	0	0	0	0
Ac_ciRNA_04017	0	0	0	0	0	0	0	0	0	0	0	0	0	0	0	0	0	0	0	0.123381	0.0429292	0.0403465	0	0	0	0	0	0	0	0
Ac_ciRNA_04018	0	0	0	0	0	0	0	0	0	0	0.213654	0	0	0	0	0	0	0	0.0621699	0.226199	0	0.201732	0.0851128	0.199755	0	0	0	0	0	0
Ac_ciRNA_04020	0	0	0	0	0	0	0	0	0	0	0	0	0	0	0	0	0	0	0	0	0.128788	0.141213	0	0	0	0	0	0	0	0
Ac_ciRNA_04024	0	0.0676482	0	0	0.0627206	0.0597178	0.100904	0	0	0	0	0	0	0.0421334	0	0	0	0.0630255	0	0.041127	0.0429292	0	0	0.0887801	0.0664193	0.192003	0.0986101	0.128897	0	0.0418878
Ac_ciRNA_04028	0	0	0	0	0	0	0	0	0	0	0	0	0	0	0	0	0	0	0.145063	0.0822541	0.0429292	0	0	0.0887801	0	0	0	0	0	0
Ac_ciRNA_04031	0	0	0	0	0	0	0	0	0.0423501	0.0850477	0.0388462	0	0	0	0	0	0	0	0	0	0	0	0	0	0	0	0	0	0	0
Ac_ciRNA_04032	0	0	0	0	0.0836275	0.0995297	0	0	0	0	0	0	0	0	0	0	0	0	0	0	0	0	0	0	0	0.0853346	0	0	0	0.0418878
Ac_ciRNA_04040	0	0	0	0	0	0	0.0605422	0	0	0	0	0	0.128435	0.0842667	0.0664711	0.112155	0.122682	0.105042	0	0	0	0	0	0	0	0	0.059166	0	0	0
Ac_ciRNA_04041	0	0	0	0	0	0	0	0	0	0	0	0	0	0	0	0	0	0	0.18651	0.123381	0	0.080693	0	0.17756	0	0	0	0	0	0
Ac_ciRNA_04045	0	0	0	0.0798283	0	0	0.464157	0.195985	0.105875	0.0850477	0	0	0	0	0.952752	0	0	0.483195	0	0	0	0	0	0	0.553494	0.384006	0.19722	0	0.358856	0.0837755
Ac_ciRNA_04055	0	0	0	0	0	0	0	0	0	0	0	0	0	0.0421334	0.0664711	0.157017	0.122682	0.105042	0	0	0	0	0	0	0	0	0	0	0	0
Ac_ciRNA_04061	0	0.450988	0	0.379184	0	0	0	0.313576	0	0	0	0.424921	0	0	0.398826	0	0	0	0.207233	0.719723	0.708332	0.524504	0.59579	0.577071	0	0	0	0	0.302194	0
Ac_ciRNA_04069	0	0.0450988	0	0	0	0	0	0	0.0423501	0.0425238	0	0	0	0	0	0	0	0	0	0	0	0	0	0	0	0	0	0.0429658	0	0
Ac_ciRNA_04072	0	0	0	0	0	0	0	0.0587955	0	0	0	0	0.0856233	0.0421334	0.0886281	0.067293	0.0817877	0	0	0	0	0	0	0	0	0	0	0	0	0
Ac_ciRNA_04079	0	0	0	0	0	0	0	0.117591	0.169401	0.170095	0.0776925	0.222578	0	0	0	0	0	0	0.0828932	0.246762	0.0429292	0.100866	0.0851128	0	0	0	0	0	0	0
Ac_ciRNA_04086	0	0	0	0	0	0	0	0.078394	0.0847003	0.0425238	0	0	0	0	0	0	0	0	0	0	0	0	0	0	0	0	0	0	0	0
Ac_ciRNA_04093	0.0420984	0	0	0.0399141	0.0836275	0.0995297	0.383434	0	0.0423501	0.0850477	0	0	0	0	0	0	0	0	0	0	0	0	0	0	0	0	0	0.214829	0.0377743	0.0837755
Ac_ciRNA_04098	0	0	0	0	0	0	0	0	0	0	0	0	0.278276	0.105333	0.110785	0.269172	0.26581	0.105042	0	0	0	0	0	0	0	0	0	0	0	0
Ac_ciRNA_04103	0	0	0	0	0	0	0	0	0	0	0	0	0.107029	0	0.0886281	0.112155	0.0817877	0.168068	0	0	0	0	0	0	0	0	0	0	0	0
Ac_ciRNA_04105	0	0	0	0	0	0	0	0	0	0	0	0	0	0.0632001	0.0443141	0	0	0	0	0	0	0	0	0	0	0.0426673	0.0788881	0.0644487	0	0
Ac_ciRNA_04106	0	0	0	0	0	0.0597178	0.0403615	0.039197	0	0	0	0	0.128435	0.0842667	0.110785	0.044862	0.163575	0.27311	0	0	0	0	0	0	0	0.064001	0	0	0	0
Ac_ciRNA_04107	0	0	0	0	0	0	0	0	0	0	0.0388462	0.0809374	0.128435	0.0421334	0.0443141	0.044862	0	0.042017	0	0	0	0	0	0.0665851	0	0	0.0986101	0	0	0
Ac_ciRNA_04110	0	0	0	0	0	0	0	0.078394	0	0.0425238	0	0.0404687	0.51374	0.273867	0.465298	0.381327	0.286257	0.315127	0	0	0	0	0	0	0	0	0	0	0	0
Ac_ciRNA_04113	0	0	0	0	0	0	0	0	0	0	0	0	0.171247	0.316	0	0.358896	0	0.210085	0	0	0	0	0	0	0	0	0	0	0	0
Ac_ciRNA_04117	0	0.428438	0.118138	0.439055	0.271789	0.696708	0.706326	0.470364	0.550552	0	0	0.263047	0	0.168533	0	0.560775	0	0	0	0.431834	0	0.363118	0.297895	0.288535	0	0.896013	1.95248	1.46084	1.4732	0
Ac_ciRNA_04118	0	0	0	0.0598712	0	0	0.0403615	0	0	0	0.0388462	0	0	0	0	0	0	0.042017	0.0414466	0	0	0.0403465	0	0.0443901	0	0.0426673	0.059166	0	0.0566614	0.125663
Ac_ciRNA_04119	0	0	0	0	0	0	0	0	0.317626	0	0.679809	0	0	0.589867	0	0.628068	0	0	0.704592	0.904795	0	0	0.489399	0.466096	0	0	0	0	0	0
Ac_ciRNA_04120	0.0420984	0	0	0	0	0	0	0	0	0.0850477	0	0	1.22013	0.842667	0	0	1.04279	1.17648	0	0	0	0	0	0	0	0.341338	0	0	0	0
Ac_ciRNA_04125	0	0	0.0984487	0	0	0	0	0	0	0	0	0	0	0	0	0	0	0	0	0	0	0	0	0	0.553494	0.384006	0	1.09563	0.377743	0
Ac_ciRNA_04128	0.105246	0.202945	0.177208	0.179614	0.188162	0.617084	0.302711	0	0	0	0	0	0	0	0	0	0	0	0	0	0	0	0	0	0.420655	1.06668	0.354996	0.300761	0.0755486	0.188495
Ac_ciRNA_04130	0	0	0	0	0	0	0	0	0	0	0	0	0.149841	0.0421334	0.132942	0.089724	0.0817877	0.105042	0	0	0	0	0	0	0	0	0	0	0	0
Ac_ciRNA_04141	0	0	0	0	0	0	0	0	0	0	0	0	0.0856233	0.147467	0.110785	0.157017	0.122682	0.147059	0	0	0	0	0	0	0	0	0	0	0	0
Ac_ciRNA_04144	0	0	0	0	0	0	0	0	0	0	0	0	0.0642175	0.0421334	0.177256	0	0	0.042017	0	0	0	0	0	0	0	0	0	0	0	0
Ac_ciRNA_04149	0.27364	0	0	0.159657	0	0.258777	0.302711	0	0	0.0425238	0	0.0607031	0	0	0	0	0	0	0	0	0	0	0	0	0.553494	0.192003	0	0	0.39663	0.356046
Ac_ciRNA_04150	0.147344	0	0	0.139699	0	0	0	0.274379	0.254101	0.297667	0.660386	0.263047	1.24154	0.779467	1.19648	1.50288	1.08369	0.819331	0.787486	1.41888	1.50252	1.69455	1.38308	1.3539	0	0	0	0	0	0
Ac_ciRNA_04153	0.0420984	0.0450988	0	0.0798283	0.0836275	0	0.100904	0.039197	0	0	0.0388462	0	0.0428117	0	0	0.044862	0.0408939	0	0.0414466	0.0616905	0	0.0605197	0	0	0	0	0	0	0	0
Ac_ciRNA_04154	0.105246	0.0901976	0.334726	0.33927	0.229976	0.318495	0.54488	0.293978	0.169401	0.425238	0	0.161875	0.192652	0.0632001	0.0443141	0.067293	0	0.210085	0.290126	0.164508	0.214646	0.221906	0.0851128	0	0	0.0426673	0	0	0	0
Ac_ciRNA_04155	0	0.0450988	0.0590692	0	0	0	0.121084	0.078394	0	0.10631	0	0.0404687	0	0	0	0	0	0	0	0	0	0	0	0	0	0	0.039444	0	0	0
Ac_ciRNA_04159	0	0	0	0	0	0	0	0	0	0	0.0582694	0	0	0	0	0	0	0	0.145063	0.102818	0.128788	0.161386	0.0638346	0.0665851	0	0	0	0	0	0
Ac_ciRNA_04160	0	0	0	0	0	0	0.161446	0.039197	0	0.0425238	0	0	0.192652	0.147467	0.177256	0.112155	0.245363	0.105042	0	0	0	0	0	0	0.0442795	0.106668	0.0788881	0	0.0377743	0
Ac_ciRNA_04161	0	0	0	0	0	0	0.0403615	0	0	0	0.0776925	0.0607031	0.235464	0.0632001	0.0886281	0.089724	0.102235	0.042017	0	0	0.0429292	0.0605197	0.0425564	0.0443901	0	0.0426673	0.039444	0.0644487	0	0
Ac_ciRNA_04163	0.0420984	0.0450988	0	0.0997853	0	0.0398119	0.100904	0	0.0635252	0.0637858	0	0.0404687	0.0856233	0.105333	0	0	0	0	0	0	0	0.0403465	0	0.0443901	0.0664193	0	0.138054	0	0.151097	0.0418878
Ac_ciRNA_04164	0	0	0	0	0	0	0	0.039197	0	0	0	0	0	0	0	0	0	0	0	0	0	0	0	0	0	0	0.256386	0.0644487	0.0944357	0.104719
Ac_ciRNA_04165	0	0	0.0393795	0.119742	0	0	0.080723	0	0	0	0	0	0.0428117	0	0.110785	0	0.0408939	0	0	0	0	0	0	0	0.0664193	0.0853346	0	0.0429658	0.0566614	0.0628316
Ac_ciRNA_04166	0	0	0	0	0	0	0	0	0	0	0	0	0	0	0	0	0	0	0	0	0	0	0	0	0	0	0.039444	0.0644487	0	0.0418878
Ac_ciRNA_04167	0	0.0450988	0	0	0	0	0	0	0	0	0	0.0404687	0	0	0	0.044862	0	0	0	0	0	0	0	0	0.0442795	0.128002	0.039444	0.0644487	0.113323	0.0418878
Ac_ciRNA_04168	0	0	0	0	0	0	0	0	0	0.0425238	0	0	0	0	0	0	0	0	0	0	0	0	0	0	0.0442795	0.0853346	0.157776	0.0644487	0.0755486	0.0628316
Ac_ciRNA_04174	0	0	0	0	0	0	0	0	0	0	0	0	0	0	0	0	0.0613408	0.0840339	0	0	0	0	0	0	0	0	0	0	0	0
Ac_ciRNA_04175	0	0	0	0	0	0	0	0	0.12705	0.0425238	0.174808	0.121406	0.0428117	0	0	0	0	0	0	0.452397	0.150252	0.080693	0.127669	0	0	0	0	0	0	0
Ac_ciRNA_04176	0	0	0.0393795	0	0	0	0	0	0	0	0.796348	0	0	0	0	0	0	0	0.518083	0.699159	0.515151	0.625371	0	0	0	0	0	0	0	0
Ac_ciRNA_04177	0	0	0	0	0.0418137	0.0398119	0.28253	0	0	0	0	0.0404687	0	0	0	0	0	0	0	0	0	0	0	0	1.59406	0.149336	0.059166	0	0	0
Ac_ciRNA_04181	0	0	0	0	0	0	0	0	0	0	0	0	0	0	0.177256	0.134586	0.122682	0.147059	0	0	0	0	0	0	0	0	0	0	0	0
Ac_ciRNA_04188	0	0	0	0	0	0	0	0	0	0	0	0	0.278276	0.147467	0.0664711	0.089724	0.143129	0.0840339	0	0	0	0	0	0	0	0	0	0	0	0
Ac_ciRNA_04190	0	0.0450988	0.0393795	0	0	0	0	0	0	0	0	0	0	0	0	0	0	0	0	0	0	0	0	0	0.0442795	0.064001	0.118332	0	0.0377743	0.125663
Ac_ciRNA_04193	0	0.0450988	0	0	0	0.0597178	0.100904	0.0979925	0	0.127572	0	0	0	0	0	0	0	0	0	0	0	0	0	0	0.0664193	0	0.0986101	0.0644487	0	0
Ac_ciRNA_04196	0	0	0	0	0	0	0	0	0	0	0	0	0	0	0.155099	0.560775	0	0	0	0	0	0	0	0	0	0	0	0	0	0
Ac_ciRNA_04197	0	0	0	0	0	0	0	0	0	0	0	0	0	0	0	0	0	0	1.16051	1.04874	0.708332	0.68589	0.978797	0	0	0	0	0	0	0
Ac_ciRNA_04198	0	0	0	0	0	0	0	0	0	0	0	0	0	0	0	0	0	0	0.0414466	0.041127	0	0	0.0638346	0	0	0	0	0	0	0
Ac_ciRNA_04202	0	0	0	0	0	0	0	0	0	0	0	0	0	0	0	0	0	0	0	0	0	0.0403465	0	0	0	0	0	0	0.0377743	0.0628316
Ac_ciRNA_04204	0.126295	0	0	0.0598712	0	0.119436	0	0.313576	0.12705	0.148833	0	0.101172	0	0	0	0	0	0	0	0	0	0	0	0	0.309957	0.149336	0	0	0	0.0837755
Ac_ciRNA_04208	0	0.36079	0.334726	0.578755	0	0	0.161446	0	0	0	0	0	0	0	0	0	0	0	0	0	0	0	0	0	0	0	0	0	0.812147	0.900587
Ac_ciRNA_04211	1.45239	2.25494	1.20107	0	0	0	0	0	0	0	0	0	0	0	0	0	0	0	0	0	0	0	0	0	0	0	1.45943	0	0	0
Ac_ciRNA_04214	0.189443	0.36079	0.452864	0	0	0	0	0	0	0	0	0	0	0	0	0	0	0	0	0	0	0	0	0	0	0	0	0	0	0
Ac_ciRNA_04216	0.105246	0.135296	0.0393795	0.139699	0.188162	0.238871	0	0	0	0	0	0	0	0	0	0	0	0	0	0	0	0	0	0	0.686332	0.917347	0.118332	0	0.0566614	0.125663
Ac_ciRNA_04220	2.21017	3.49516	1.87053	2.15536	0	0	0.504519	0	0	0	0	0	0	0	0.0443141	0	0	0	0	0	0	0	0	0	10.8485	0	1.93276	0	0	0
Ac_ciRNA_04222	0.0631476	0	0	0	0	0	0	0	0	0	0	0	0	0	0	0	0	0	0	0	0	0	0	0	0.088559	0	0.039444	0.0644487	0	0.104719
Ac_ciRNA_04223	0.357836	0.518636	0.196897	0.179614	0.209069	0.676802	0	0	0	0	0	0	0	0	0	0	0	0	0	0	0	0	0	0	2.50179	0	0.315552	0	0.679937	1.7174
Ac_ciRNA_04224	0.27364	0.450988	0	0	0	0.557366	0	0	0	0	0	0	0	0	0	0	0	0	0	0	0	0	0	0	2.45751	0.981348	0	0.837833	0	0.628316
Ac_ciRNA_04234	0	0.0676482	0	0	0	0	0.080723	0	0.0423501	0.0637858	0	0	0	0	0	0	0	0	0	0.205635	0	0.080693	0.0425564	0	0.243537	0.0426673	0.236664	0	0.0377743	0
Ac_ciRNA_04236	0	0	0	0	0	0	0	0	0	0	0	0	0.214058	0.1896	0.110785	0.089724	0.143129	0.105042	0	0	0	0	0	0	0	0	0	0	0	0
Ac_ciRNA_04241	0	0	0	0	0	0	0	0	0	0	0	0	0.107029	0.105333	0	0	0.122682	0.0630255	0	0	0	0	0	0	0	0	0	0	0	0
Ac_ciRNA_04242	0	0	0	0	0	0	0	0	0	0	0	0	0.149841	0.358134	0.0886281	0.112155	0.0613408	0.0840339	0	0	0	0	0	0	0	0	0	0	0	0
Ac_ciRNA_04243	0.0631476	0	0.0393795	0	0	0.0597178	0	0.039197	0.0423501	0.0425238	0	0	1.04889	0.821601	0.310198	0.515913	0.388492	0.294119	0	0	0	0	0	0	0.0664193	0	0	0	0	0
Ac_ciRNA_04244	0	0	0	0	0	0	0	0	0.148225	0.0850477	0	0	0	1.11653	0	0	0.592961	0.483195	0	0	0	0	0	0	0	0	0	0	0	0
Ac_ciRNA_04246	2.75744	2.66083	2.20525	1.77618	2.69699	4.95658	3.6729	0	0	0	0	0.14164	0.470928	0	0.199413	0.291603	0	0	0	0	0	0	0	0	10.6935	9.72815	7.41548	9.64582	5.81724	6.26222
Ac_ciRNA_04248	0	0	0	0	0	0	0	0	0	0	0	0	0	0	0	0	0	0	0	0	0	0	0	0	0	0	0.039444	0	0.0566614	0.0837755
Ac_ciRNA_04251	0	0	0	0	0	0	0	0.254781	0.190576	0.191357	0	0.0607031	0	0	0	0	0	0	0	0	0	0	0	0	0	0	0	0	0	0
Ac_ciRNA_04252	0	0	0	0.0598712	0	0	0.161446	0	0.0847003	0	0	0	0.128435	0.0632001	0.0886281	0.044862	0	0	0	0	0	0	0	0	0	0	0.039444	0	0.0377743	0
Ac_ciRNA_04254	0	0	0	0	0	0	0	0	0	0	0	0	0	0	0	0	0	0	0	0.514088	0	0.423638	0.404286	0.355121	0	0	0	0	0	0
Ac_ciRNA_04256	0	0	0	0	0	0	0	0	0	0	0.0582694	0	0	0	0	0	0	0	0.145063	0.0822541	0.0643938	0.0403465	0.0425564	0.0443901	0	0	0	0	0	0
Ac_ciRNA_04258	0	0	0	0	0	0	0	0	0	0	0.388462	0	0	0	0	0	0	0	0.227956	0.596342	0.343434	0.282425	0.297895	0.399511	0	0	0	0	0	0
Ac_ciRNA_04261	0	0	0.0393795	0	0	0	0.0605422	0.039197	0	0	0	0	0	0	0	0	0	0	0	0	0	0	0	0	0	0.0426673	0	0	0	0
Ac_ciRNA_04267	0	0	0	0	0	0	0	0	0	0	0	0	0	0.0421334	0	0	0	0	0	0	0	0	0	0	0	0	0	0.0644487	0.0566614	0.0628316
Ac_ciRNA_04269	0	0	0	0	0	0	0	0	0	0	0	0	0.342493	0.337067	0.177256	0.67293	0.674749	0.27311	0	0	0	0	0	0	0	0	0	0	0	0
Ac_ciRNA_04270	0.0420984	0	0	0	0.0418137	0	0	0	0	0	0	0	0.385305	0.463467	0	0.291603	0.306704	0.378153	0	0	0	0	0	0	0	0	0	0	0	0
Ac_ciRNA_04272	0	0	0	0	0	0	0	0	0	0	0	0	0	0	0	0	0.0408939	0.0630255	0	0	0	0	0	0	0.0442795	0.064001	0	0	0	0
Ac_ciRNA_04276	0	0	0	0	0	0	0	0	0	0	0	0	0	0	0.0443141	0.044862	0	0	0	0	0	0	0	0	0	0	0	0	0	0
Ac_ciRNA_04278	0	0.0450988	0	0	0	0	0	0	0	0	0	0.0809374	0	0	0	0	0	0	0	0	0	0	0.0425564	0	0	0.0426673	0.177498	0.0644487	0.0377743	0.0837755
Ac_ciRNA_04284	0	0	0	0	0	0	0	0	0	0.403976	0	0	0	0	0	0	0	0	0.0621699	0.123381	0.0858584	0	0	0	0.0442795	0	0	0	0	0.104719
Ac_ciRNA_04285	0	0	0	0	0	0	0	0	0	0	0	0	0	0	0.332355	0.471051	0.429386	0.294119	0	0	0	0	0	0	0	0	0	0	0	0
Ac_ciRNA_04293	0	0	0	0	0	0	0	0	0	0	0	0	0.278276	0.1896	0.354512	0.403758	0.347598	0.378153	0	0	0	0	0	0	0	0	0	0	0	0
Ac_ciRNA_04305	0	0	0	0	0	0	0	0	0.0423501	0.0425238	0	0	0	0	0	0	0	0	0	0	0	0	0	0	0	0	0	0	0	0
Ac_ciRNA_04309	0.231541	0.0901976	0.078759	0.0399141	0.0836275	0.199059	0.181627	0.078394	0	0.0425238	0	0	0.428117	0.1896	0.332355	0.403758	0.286257	0.315127	0	0	0	0	0	0	0.132839	0.192003	0.414162	0.279278	0.302194	0.64926
Ac_ciRNA_04312	0	0	0	0	0	0	0	0.078394	0.0635252	0	0	0	0.0428117	0	0.132942	0	0.286257	0.0840339	0	0	0	0	0	0	0	0	0	0	0	0
Ac_ciRNA_04317	0	0	0	0	0	0	0	0	0	0	0	0	6.9569	4.69787	4.16552	7.02091	5.62291	2.45799	0	0	0.772726	0	0.59579	0.887801	0	0	0	0	0	0
Ac_ciRNA_04318	0	0	0	0	0	0	0	0	0	0	0	0	0.149841	0.210667	0.155099	0.134586	0.184022	0	0	0	0	0	0	0	0	0	0	0	0	0
Ac_ciRNA_04319	0	0	0	0	0	0	0	0	0	0	0	0	0	0	0	0	0.0408939	0.042017	0	0	0	0	0	0	0	0	0	0	0	0
Ac_ciRNA_04323	0	0	0	0	0	0	0	0	0	0	0	0	0	3.70774	3.16845	4.75537	3.90536	1.95379	0.37302	0.822541	1.48106	1.08936	1.10647	1.53146	0	0	0	0	0	0
Ac_ciRNA_04324	0	0	0	0	0	0	0	0	0	0	0	0	0	0.1264	0	0	0.838324	0.0840339	0	0	0	0	0	0	0	0	0	0	0	0
Ac_ciRNA_04325	0	0	0.196897	0	0	0	0	0.117591	0	0	0	0	0	0	0	0	0	0.126051	0	0	0	0	0.0851128	0.22195	0	0	0	0	0	0
Ac_ciRNA_04326	0	0	0	0	0	0	0	0	0	0	0	0.404687	0	0	0	0	0	0.168068	0	0.0616905	0	0	0.0638346	0.17756	0	0	0.0788881	0	0	0
Ac_ciRNA_04350	0	0	0	0	0	0	0	0	0	0	0	0	1.0917	0.842667	0	1.25614	1.12458	0	0	0	0	0	0	0	0	0	0	0	0	0
Ac_ciRNA_04351	0	0	0	0	0	0	0.0605422	0	0	0	0	0	0	0	0	0	0	0	0	0	0	0	0	0	0.199258	0.0426673	0.039444	0	0.0755486	0
Ac_ciRNA_04356	0	0	0	0	0	0	0	0	0.190576	0.148833	0	0.0607031	0	0	0	0	0	0	0	0	0	0	0	0	0	0	0	0	0	0
Ac_ciRNA_04357	0	0	0	0	0.0418137	0	0	0	0	0	0	0	0.25687	0.168533	0.265884	0.179448	0.184022	0.0630255	0	0	0	0	0	0.110975	0	0	0	0	0	0
Ac_ciRNA_04360	0	0	0	0	0	0	0	0	0	0	0.0388462	0	0	0	0	0	0	0	0	0	0.0429292	0.0403465	0.0425564	0.110975	0	0	0	0	0	0
Ac_ciRNA_04361	0	0	0	0	0	0	0	0	0	0	0	0	0	0	0	0	0	0	0	0	0	0	0	0	0	0	0.039444	0.0429658	0	0
Ac_ciRNA_04363	0	0	0	0	0	0.0398119	0	0	0	0	0.0582694	0	0	0	0	0	0	0	0.0414466	0	0.0643938	0	0.0425564	0	0.0442795	0	0.059166	0.0429658	0	0.104719
Ac_ciRNA_04370	0	0	0	0	0	0	0	0	0	0	0	0	0.0642175	0	0	0	0.0817877	0.042017	0	0	0	0	0	0	0	0	0	0	0	0
Ac_ciRNA_04371	0	0	0	0	0	0	0	0	0	0	0.0776925	0.0809374	0	0	0.155099	0	0.26581	0	0	0	0	0	0	0	0.110699	0	0.059166	0	0	0
Ac_ciRNA_04373	0	0	0	0	0	0	0	0	0	0	0	0	0	0	0	0	0	0	0	0	0	0	0	0	0	0	0.059166	0.0429658	0.0755486	0
Ac_ciRNA_04375	0	0	0	0	0	0	0	0	0	0	0	0	0.149841	0	0	0	0.143129	0.105042	0	0	0	0	0	0	0	0	0	0	0	0
Ac_ciRNA_04377	0	0	0	0	0	0	0	0	0	0	0	0	0	0	0	0	0	0	0	0	0	0	0	0	0	0	0	0	0.0377743	0.0418878
Ac_ciRNA_04383	0	0	0	0	0	0	0	0	0	0	0	0	0	0	0	0	0	0	0	0	0	0	0	0	0	0	0.059166	0.0859316	0.0377743	0.0837755
Ac_ciRNA_04387	0	0	0	0	0.0627206	0	0.080723	0	0	0	0	0	0	0	0	0	0	0	0.207233	0.575778	0	0.161386	0	0.355121	0	0	0	0	0.0377743	0
Ac_ciRNA_04391	0.294689	0.135296	0.0984487	0.199571	0.146348	0.179153	0.26235	0	0.12705	0	0.233077	0.0404687	0.385305	0.168533	0.199413	0.358896	0.592961	0.441178	0.18651	0.164508	0.171717	0.161386	0.127669	0.110975	0.199258	0.213337	0.216942	0.0429658	0.207759	0.293214
Ac_ciRNA_04392	0.926165	1.10492	0.708831	0.878111	0.648113	0	0	0	0	0	0.388462	0.526093	0.470928	0.4424	0.620397	0.628068	0.490726	0.525212	0	0.370143	0	0	0	0	0	1.98403	0	1.03118	1.34099	1.34041
Ac_ciRNA_04394	0	0	0	0	0	0	0	0	0	0	0.679809	0.586796	0	0	0	0	0	0	0.725316	0.987049	0.515151	0.847276	0.574511	0.532681	0	0	0	0	0	0
Ac_ciRNA_04409	0	0	0	0	0.919902	0	0	0	0.359976	0	0	0	0	0	0	0	0	0	0	0	2.83333	0	1.59586	1.10975	0	0	0	0	0	0.146607
Ac_ciRNA_04414	0	0.0450988	0	0	0	0	0	0	0	0	0	0	0	0	0	0	0	0	0	0	1.84596	3.14703	1.44692	1.24292	0	0	0	0	0	0
Ac_ciRNA_04415	0	0	0	0	0	0	0	0	0	0	0	0	0	0	0	0	0	0	0	0.041127	0	0.141213	0.0851128	0.0665851	0	0	0	0	0	0
Ac_ciRNA_04423	0	0	0	0	0	0.0398119	0	0	0	0	0	0.0607031	0	0	0	0	0	0.042017	0	0	0	0	0	0	0	0.064001	0.0986101	0.193346	0	0.0837755
Ac_ciRNA_04426	0	0	0	0	0	0	0	0	0	0	0	0	0	0	0	0	0	0	0	0	0	0	0	0	0	0	0.0788881	0.0429658	0.0377743	0.104719
Ac_ciRNA_04428	0	0	0	0	0	0	0	0	0	0	0	0	0.171247	0.294934	0	0	0	0	0	0	0	0	0	0	0	0	0	0	0	0
Ac_ciRNA_04433	0	0	0	0	0	0	0	0	0	0	0	0	0	0	0.0443141	0.044862	0	0	0	0	0	0	0	0	0	0	0	0	0	0
Ac_ciRNA_04443	0.231541	0.248043	0.236277	0.0399141	0.0836275	0.119436	0.181627	0.13719	0.0847003	0	0.155385	0.0404687	0	0	0	0	0	0	0.31085	0.431834	0.150252	0.322772	0.127669	0.22195	0.243537	0.320005	0.157776	0.236312	0.604388	0.27227
Ac_ciRNA_04448	0	0	0	0	0	0	0	0.881933	0.889353	0.595334	0	0.93078	0	0	0	0	0	0	0	0	0	0	0	0	0	0	0	0	0	0
Ac_ciRNA_04451	0	0	0	0	0	0	0	0	0	0	2.54443	0	0	0	0	0	0	0	1.59569	1.48057	1.84596	0	2.44699	2.72999	0	0	0	0	0	0
Ac_ciRNA_04455	0	0	0	0	0	0	0	0	0	0	0	0	0	7.01521	8.48614	1.54774	2.61721	0.189076	0	0	0	0.181559	0	0	0	0	0	0	0	0
Ac_ciRNA_04456	0	0	0	0	0	0	0	0	0.529377	1.21193	0	1.17359	0	0	0	0	0	0	0	0	0	0	0	0	0	0	0	0	0	0
Ac_ciRNA_04457	0	0	0	0	0	0	0	0.039197	0.0847003	0.0425238	0	0.0809374	0	0	0	0	0	0	0	0	0	0	0	0	0	0	0	0	0	0
Ac_ciRNA_04471	0	0	0	0	0	0	0	0	0	0	0	0	0.235464	0.210667	0	0.112155	0.184022	0.042017	0	0	0	0	0	0	0	0	0	0	0	0
Ac_ciRNA_04472	0	0	0	0	0	0	0	0	0	0	0	0	0.0856233	0	0.0443141	0.044862	0.0408939	0	0	0	0	0	0	0	0	0	0	0	0	0
Ac_ciRNA_04474	0	0	0	0	0	0	0	0	0.0847003	0.0637858	0	0	0	0.421334	0.243727	0.269172	0.184022	0.126051	0	0	0	0	0	0	0	0	0	0	0	0
Ac_ciRNA_04477	0	0	0	0	0	0	0	0	0	0	0	0	0	0	0	0	0	0	0	0	0	0	0	0	0	0	0.059166	0.171863	0	0
Ac_ciRNA_04478	0	0	0	0	0	0	0	0	0.0635252	0	0	0.161875	0.0856233	0.0632001	0.0664711	0.089724	0.0408939	0.0840339	0	0	0	0	0	0	0	0	0	0	0	0
Ac_ciRNA_04483	0	0	0	0	0	0.437931	0	0	0	0.425238	0	0.364218	0	0	0	0.740223	0.592961	0	0	0	0	0	0	0	0.487075	0.64001	0	0	0.434404	0.27227
Ac_ciRNA_04485	0	0	0	0	0	0	0.948495	0	0	0	0	0	0	0	0	0	0	0	0	0	0.214646	0.443811	0	0	0	0	0	0	0	0
Ac_ciRNA_04488	0	0	0	0	0	0	0	0	0	0	0	0	0	0	0	0	0	0	0	0	0	0	0	0	0	0	0	0	0.0755486	0.0628316
Ac_ciRNA_04493	0	0	0	0	0	0	0	0	0	0	0	0	0	0	0	0	0	0	0	0	0	0	0	0	0	0	0.059166	0.0429658	0	0
Ac_ciRNA_04497	0	0	0	0	0	0	0	0	0	0	0	0	0.0428117	0.0421334	0.0443141	0	0	0.042017	0	0	0	0	0	0	0	0	0	0	0	0
Ac_ciRNA_04498	0	0	0	0	0	0	0	0	0	0	0	0	0.0856233	0	0.0664711	0.044862	0	0.0840339	0	0	0	0	0	0	0	0	0	0	0	0
Ac_ciRNA_04502	0	0	0	0	0	0	0	0	0	0	0	0	0	0.0632001	0	0	0.0613408	0.0630255	0	0	0	0	0	0	0	0	0	0	0	0
Ac_ciRNA_04511	0	0	0	0	0	0	0	0	0	0	0	0	0.171247	0.1264	0.110785	0.134586	0.102235	0.126051	0	0	0	0	0	0	0	0	0	0	0	0
Ac_ciRNA_04516	0.0420984	0	0	0	0	0	0	0	0	0	0	0	0.128435	0.1896	0	0	0.184022	0.105042	0	0	0	0	0	0	0	0	0	0	0	0
Ac_ciRNA_04520	0	0	0	0	0	0	0	0	0	0	0	0	4.83772	3.56027	4.71945	4.39648	3.63955	2.92018	1.92727	2.38537	1.73863	1.93663	1.21286	1.46487	0	0	0	0	0	0
Ac_ciRNA_04522	0	0	0	0	0	0	0	0	0	0	0	0	2.41886	3.11787	2.45943	2.2431	1.53352	1.34454	1.40918	1.43945	1.11616	1.04901	0	1.44268	0	0	0	0	0	0
Ac_ciRNA_04523	0.105246	0.202945	0	0.199571	0	0.179153	0.201807	0.548758	0.254101	0	0.291347	0.202344	0	0	0	0	0	0	0	0	0	0	0	0	0.819171	0.618676	0.709992	0.451141	0.52884	0
Ac_ciRNA_04524	0.77882	1.53336	1.37828	1.65644	1.19169	2.52805	2.50241	2.09704	0	1.99862	1.78693	1.82109	0	1.74853	2.08276	1.83934	2.18782	1.82774	1.5128	0	1.45959	0	1.4682	1.70902	5.97773	5.56808	0	0	5.34506	5.11031
Ac_ciRNA_04526	0	0	0	0.0399141	0	0	0	0	0	0	0	0	0	0.589867	0	0	0.73609	0.315127	0	0	0	0	0	0	0	0.277337	0	0	0	0
Ac_ciRNA_04527	0	0.0676482	0.0590692	0	0	0.0597178	0	0	0	0	0	0.101172	0	0	0	0	0	0	0	0	0	0	0	0	0.177118	0.192003	0.19722	0.214829	0.188871	0.230383
Ac_ciRNA_04530	0.589377	1.01472	0.74821	0.558798	0	1.3337	1.25121	0	0	0	0	0	3.40353	0	2.50374	0	0	1.89076	0	0	0	0	0	0	3.03315	0	3.92468	2.81426	2.75752	2.34571
Ac_ciRNA_04536	0	0	0	0	0	0	0	0	0	0	0	0	0	0	0	0	0	0	0	0	0	0	0	0	0.0442795	0	0.19722	0	0.188871	0.0418878
Ac_ciRNA_04539	0	0	0	0	0	0	0	0.411569	0.190576	0.0850477	0.0388462	0.182109	0	0	0	0	0	0	0	0	0	0	0	0	0	0	0	0	0	0
Ac_ciRNA_04541	0	0	0.275656	0.498927	0.731741	0	0.585242	0	0.148225	0	0.660386	0	0	0	0.841967	0	0	0	0.207233	0.534651	0	0	0	0	0	0	0	0	0.26442	0.670204
Ac_ciRNA_04543	0	0	0	0	0	0	0	0	0	0	0	0	0.107029	0.0421334	0	0	0	0	0	0	0	0	0	0	0	0	0	0	0	0
Ac_ciRNA_04545	0.0420984	0.0676482	0	0	0.0418137	0	0	0	0	0	0	0	0.0428117	0	0	0	0	0	0	0	0	0	0	0	0.088559	0.064001	0.059166	0	0.0377743	0
Ac_ciRNA_04548	0	0	0	0	0	0	0	0	0.0635252	0	0	0	0.706392	0.589867	0.398826	0.493482	0.408939	0.630255	0	0	0	0	0	0	0	0	0	0	0	0
Ac_ciRNA_04555	0	0	0	0	0	0	0	0	0	0	0	0	0	0	0	0	0	0	0	0	0	0	0	0	0	0	0.0986101	0.0644487	0	0
Ac_ciRNA_04561	0	0	0	0.0798283	0	0	0	0.078394	0	0.0425238	0	0	0	0	0.0443141	0	0	0	0	0	0.0429292	0	0	0	0.0442795	0.192003	0.157776	0.128897	0	0
Ac_ciRNA_04564	0	0	0.078759	0.0399141	0.104534	0.0398119	0.100904	0.078394	0.0423501	0.10631	0	0.0404687	0	0	0	0	0	0	0	0	0	0	0	0	0.0442795	0.0426673	0.039444	0.0644487	0	0
Ac_ciRNA_04565	0	0	0	0	0	0	0	0	0	0	0.271924	0	0	0	0	0	0	0	0.518083	3.41354	0.622474	0.564851	0.766015	0.954386	0	0	0	0	0	0
Ac_ciRNA_04569	0	0	0	0	0	0	0	0	0	0	0	0	0	0	0	0	0	0	0	0	0	0	0	0	0	0	0.216942	0.0644487	0.0755486	0.125663
Ac_ciRNA_04572	0	0	0	0	0	0	0	0.0587955	0.0635252	0.10631	0	0.121406	0	0	0	0	0	0	0	0	0	0	0	0	0	0	0	0	0	0
Ac_ciRNA_04576	0	0	0	0	0	0	0	0	0	0	0	0	0.0428117	0.0632001	0.0443141	0	0.0613408	0.0630255	0	0	0	0	0	0	0	0	0	0	0	0
Ac_ciRNA_04583	0	0	0	0	0	0	0	0	0	0.0425238	0	0	0	0	0	0	0	0	0	0	0	0	0	0	0	0	0.039444	0.0644487	0	0
Ac_ciRNA_04588	0	0	0	0	0	0	0	0	0	0	0	0.0404687	0.149841	0.0632001	0.0664711	0.134586	0.102235	0.126051	0	0	0	0	0	0	0	0	0	0	0	0
Ac_ciRNA_04589	0.0841968	0	0	0.0598712	0	0	0.121084	0	0	0	0	0	0.0428117	0	0	0.044862	0	0	0	0	0	0	0	0	0.0442795	0.0853346	0.059166	0.128897	0	0.104719
Ac_ciRNA_04593	0	0	0	0	0	0	0	0	0	0	0	0	0	0	0	0	0	0	0	0	0	0	0	0	0.132839	0	0.138054	0.107414	0.0566614	0.0628316
Ac_ciRNA_04603	0	0	0.0393795	0	0	0	0.080723	0.156788	0.169401	0.170095	0.116539	0.202344	1.56263	1.05333	0.465298	0.964533	1.02235	0.651263	0.145063	0.143945	0.193181	0.201732	0.0425564	0.0887801	0.221398	0.23467	1.59748	0.580038	4.13628	1.7174
Ac_ciRNA_04606	0	0	0	0	0	0	0	0	0	0	0	0.687968	0.556552	1.0744	0.731182	0.358896	0.715643	0.252102	0	0	0	0	0	0	0	0	0	0	0	0
Ac_ciRNA_04608	0	0	0	0	0	0	0	0	0	0	0.0971156	0	0	0	0	0	0	0	0.103617	0.164508	0.0858584	0.121039	0.0425564	0.110975	0	0	0	0	0	0
Ac_ciRNA_04610	0	0	0	0	0	0	0	0	0	0	0.796348	0	0	0	0	0	0	0	0.497359	1.33663	0.83712	0.706063	0.553233	0.554876	0	0	0	0	0	0
Ac_ciRNA_04612	0	0	0	0	0	0	0	0	0	0	0	0	0	0	0	0	0	0	0	0	0	0	0	0	0	0	0	0	0.113323	0.0837755
Ac_ciRNA_04618	0	0	0	0	0	0	0	0	0	0	0	0	0	0	0	0	0	0	0	0	0	0	0	0	0	0	0.138054	0.107414	0.0755486	0
Ac_ciRNA_04620	0	0.0676482	0.078759	0	0.0418137	0.0995297	0	0.078394	0	0	0	0.121406	0	0	0	0	0	0	0.145063	0	0	0	0	0	0	0.064001	0	0.214829	0.245533	0.104719
Ac_ciRNA_04622	0	0	0	0	0	0	0	0	0	0	0	0	0.0428117	0	0.0443141	0.044862	0	0	0	0	0	0	0	0	0	0	0	0	0	0
Ac_ciRNA_04623	0	0	0	0	0	0	0.0403615	0	0	0	0	0	0	0	0.0443141	0	0	0	0	0	0	0	0	0	0.132839	0	0	0	0.0566614	0.0628316
Ac_ciRNA_04629	1.91548	2.72848	2.02804	1.59657	4.39044	9.77382	0.80723	1.21511	0	5.91081	0	5.60492	1.28435	1.41147	0.908438	1.301	1.10413	0.945382	0.725316	3.24904	1.54545	2.42079	1.40436	3.81755	0	0	0	0	0	3.30913
Ac_ciRNA_04638	0	0	0	0	0	0	0.0403615	0	0	0	0	0.0404687	0	0	0	0	0	0	0	0	0	0	0	0	0.088559	0.106668	0	0	0	0
Ac_ciRNA_04643	0	0	0	0	0	0	0	0	0	0	0.446732	0	0	0	0	0	0	0	0	0	0.0643938	0.0605197	0.170226	0.17756	0	0	0	0	0	0
Ac_ciRNA_04652	0.126295	0.225494	0.137828	0.0798283	0.146348	0.139342	0.363253	0	0	0.0637858	0	0.101172	0	0	0	0	0	0	0	0	0	0	0	0	0.199258	0.448007	0.650826	0.300761	0.226646	0.397934
Ac_ciRNA_04653	0.0420984	0	0.177208	0.0399141	0	0.0597178	0.080723	0	0.0635252	0	0	0	0	0	0	0	0	0	0	0	0	0	0	0	0.0442795	0.0853346	0.433884	0.0644487	0.188871	0
Ac_ciRNA_04655	0	0	0	0	0	0	0	0.705546	0.465851	0.0637858	0.0776925	0.263047	0	0	0	0	0	0	0	0.041127	0	0	0	0	0	0	0	0	0	0
Ac_ciRNA_04659	0	0	0	0	0	0	0	0	0	0	0	0	0.149841	0.105333	0.132942	0.112155	0.26581	0.126051	0	0	0	0	0	0	0	0	0	0	0	0
Ac_ciRNA_04661	0	0	0	0.0399141	0	0	0.121084	0.0979925	0	0.0425238	0	0.0607031	0	0	0	0	0	0	0	0	0	0	0	0	0	0	0.216942	0	0.0755486	0
Ac_ciRNA_04662	0	0	0	0	0	0	0.0403615	0	0	0	0	0	0	0	0	0	0	0	0	0	0	0	0	0	0	0	0.039444	0.0429658	0	0
Ac_ciRNA_04663	0	0	0	0	0	0.0398119	0.0403615	0.0587955	0	0	0	0.0404687	0	0	0	0	0	0	0	0	0	0	0	0	0	0.064001	0.039444	0.128897	0	0.167551
Ac_ciRNA_04666	0	0	0	0	0	0	0	0	0	0	0	0	0	0	0.0886281	0.179448	0	0	0	0	0	0	0	0	0	0	0	0	0	0
Ac_ciRNA_04675	0	0	0	0	0	0	0	0	0	0	0	0	0	0.0421334	0	0	0.0408939	0.0630255	0	0	0	0	0	0	0	0	0	0	0	0
Ac_ciRNA_04679	0	0	0	0	0	0	0	0	0	0	0	0	0	0	0	0	0	0	0.0414466	0	0	0.0605197	0.0851128	0.155365	0	0	0	0	0	0
Ac_ciRNA_04685	0	0	0.0590692	0	0	0	0	0.176387	0.254101	0.10631	0	0	0	0	0	0	0	0	0	0	0	0	0	0	0	0	0	0	0.245533	0
Ac_ciRNA_04686	0	0	0	0	0	0	0	0	0	0	0	0	0	0	0	0	0	0	0.642423	0.781414	0	0	0.766015	0	0	0	0	0	0	0
Ac_ciRNA_04696	0	0	0	0	0	0	0	0	0	0	0	0	0	0	0	0	0	0	0.0414466	0.0616905	0	0	0	0	0	0	0	0	0	0
Ac_ciRNA_04703	0	0	0	0	0	0	0	0	0	0	0	0	0	0	0	0	0	0	0	0	0	0	0	0	0	0	0.059166	0.0644487	0.0377743	0.0628316
Ac_ciRNA_04704	0	0	0.196897	0	0.104534	0.298589	0.403615	0	0.0635252	0.0637858	0	0.101172	0	0	0	0	0	0	0	0	0	0	0	0	0.177118	0.576009	1.57776	0.257795	0.679937	0.146607
Ac_ciRNA_04710	0	0	0	0	0.0836275	0.0995297	0	0	0	0	0	0	0	0	0	0	0	0	0	0	0	0	0	0	0.088559	0.192003	0	0	0	0.104719
Ac_ciRNA_04715	0	0	0	0	0	0	0	0	0	0	0	0	0	0	0	0	0	0	0	0	0.515151	0	0.702181	0.932191	0	0	0	0	0	0
Ac_ciRNA_04718	0	0	0	0	0	0	0	0	0	0	0	0	0	0	0	0.044862	0.0613408	0.042017	0	0	0	0	0	0	0	0	0	0	0	0
Ac_ciRNA_04720	0	0	0	0	0	0	0	0	0	0	0	0	0.149841	0.0842667	0.22157	0.269172	0.286257	0.441178	0	0	0	0	0	0	0	0	0	0	0	0
Ac_ciRNA_04721	0.0420984	0.157846	0	0.0598712	0.125441	0.159248	0.464157	0	0.105875	0.212619	0	0	0	0	0	0	0	0	0	0	0	0	0	0	0.376376	0.64001	0.039444	0	0	0.146607
Ac_ciRNA_04723	0	0.0450988	0	0.0399141	0	0.0398119	0.080723	0	0	0.0425238	0	0	0	0.0421334	0	0	0	0	0	0	0	0	0	0	0.0664193	0.106668	0.138054	0.0429658	0	0.0418878
Ac_ciRNA_04725	0	0	0	0	0	0	0	0	0	0	0.0388462	0	0	0	0	0	0	0	0	0	0.0429292	0	0	0.0665851	0	0	0	0	0.113323	0.0837755
Ac_ciRNA_04731	0	0	0	0	0	0	0	0	0	0	0	0	0.0642175	0.0842667	0	0.044862	0.0408939	0	0	0	0	0	0	0	0	0	0	0	0	0
Ac_ciRNA_04737	0	0.0901976	0	0	0	0.0796238	0	0	0	0	0	0	0	0	0	0	0	0	0	0	0	0	0	0	0.177118	0	0.138054	0.193346	0.151097	0
Ac_ciRNA_04739	0	0	0	0	0	0	0	0	0	0	0	0	0.214058	0.0421334	0	0	0.0613408	0	0	0	0	0	0	0	0	0	0	0	0	0
Ac_ciRNA_04746	0	0	0	0	0	0	0	0.0979925	0.169401	0.0425238	0	0	0	0	0	0	0	0	0	0	0	0	0	0	0	0	0	0	0	0
Ac_ciRNA_04747	0	0	0	0	0	0	0	0.13719	0.105875	0	0.0388462	0.0607031	0	0	0	0	0	0	0	0	0	0	0	0	0	0	0	0	0	0
Ac_ciRNA_04749	0.0841968	0.0901976	0	0.0598712	0	0.179153	0	0.078394	0.105875	0.0850477	0.0388462	0	0	0	0	0	0	0	0	0	0	0	0	0	0	0	0	0.0859316	0.0944357	0.0628316
Ac_ciRNA_04760	0	0	0	0	0	0	0	0	0.105875	0.0850477	0.116539	0.32375	0	0	0	0.134586	0	0	0	0	0	0	0	0	0	0	0	0	0	0
Ac_ciRNA_04761	0	0	0.0984487	0.0997853	0.0627206	0	0.121084	0.078394	0	0	0	0	0.0642175	0	0	0	0	0	0	0	0	0	0	0	0.088559	0.170669	0.157776	0	0	0.0628316
Ac_ciRNA_04763	0	0	0	0	0.0627206	0	0	0	0	0	0	0	0	0	0	0.067293	0.102235	0.0630255	0	0	0	0	0	0	0	0	0	0	0	0
Ac_ciRNA_04764	0	0	0	0	0	0	0	0	0	0	0	0	0.149841	0	0.0664711	0.067293	0.122682	0.0840339	0	0	0	0	0	0	0	0	0	0	0	0
Ac_ciRNA_04765	0	0	0	0	0	0	0	0	0	0	0.135962	0	0	0	0	0	0	0	0	0	0.150252	0	0.191504	0.0887801	0	0	0	0	0	0
Ac_ciRNA_04766	0	0.0450988	0	0	0	0	0.0605422	0	0	0	0	0	0	0	0	0	0	0	0	0.329016	0	0.080693	0	0.0443901	0.177118	0	0	0	0.0944357	0.0418878
Ac_ciRNA_04769	0.210492	0.270593	0.354415	0	0	0	0.221988	0.470364	0.571727	0	0.407886	0.46539	0	0	0	0	0	0.735297	0	0	0	0	0.170226	0.355121	0	0.768012	0	0	0.509953	0.628316
Ac_ciRNA_04770	1.09456	0.992173	1.57518	0.858154	1.77708	2.3489	1.83645	0	0	0	0	0	0	0	0	0	0	0	0	0	0	0	0	0	0	4.22406	3.4908	3.58764	0	3.09969
Ac_ciRNA_04776	0	0	0	0	0	0	0	0	0	0	0	0	0.0428117	0.0421334	0	0	0	0	0	0	0	0	0	0	0	0	0	0	0	0
Ac_ciRNA_04791	0	0	0	0	0	0	0	0	0	0	0	0	0.0428117	0.0632001	0.0443141	0.044862	0.0817877	0.042017	0	0	0	0	0	0	0	0	0	0	0	0
Ac_ciRNA_04795	0	0	0	0	0	0	0	0	0	0	0	0	0	0	0.0664711	0.067293	0	0.042017	0	0	0	0	0	0	0	0	0	0	0	0
Ac_ciRNA_04803	0	0	0	0	0	0.0796238	0	0	0	0	0	0	0	0	0	0.044862	0	0	0	0	0	0	0	0	0.110699	0.106668	0.138054	0.107414	0	0.0837755
Ac_ciRNA_04806	0	0	0	0	0	0	0	0	0	0	0	0	0.0856233	0	0.0664711	0	0.0408939	0.147059	0	0	0	0	0	0	0	0	0	0	0	0
Ac_ciRNA_04816	0	0	0	0	0	0	0	0	0	0	0.388462	0	0	0	0	0	0	0	0.145063	0.308453	0.214646	0.181559	0.127669	0.26634	0	0	0	0	0	0
Ac_ciRNA_04825	0	0	0	0	0	0	0	0	0	0	0	0	0.0856233	0.1896	0.110785	0.246741	0.0817877	0.252102	0	0	0	0	0	0	0	0	0	0	0	0
Ac_ciRNA_04826	0	0	0	0	0	0	0	0	0	0	0	0	0.0428117	0	0	0	0.0408939	0.042017	0	0.041127	0	0	0	0	0	0	0	0	0	0
Ac_ciRNA_04830	0	0	0	0	0	0.0398119	0.100904	0.0979925	0	0	0	0	0	0	0	0	0	0	0	0	0	0	0	0	0	0	0	0	0	0
Ac_ciRNA_04831	0	0	0	0	0	0	0	0	0	0	0	0	0	0	0	0	0	0	0.0621699	0.123381	0.128788	0.100866	0.127669	0	0	0	0	0	0	0
Ac_ciRNA_04834	0	0	0	0	0	0	0	0	0	0	0	0	0	0	0.110785	0.044862	0.0613408	0.042017	0	0	0	0	0	0	0	0	0	0	0	0
Ac_ciRNA_04839	0	0	0	0	0	0	0	0	0	0	0	0	0.342493	0.400267	0.265884	0.358896	0.327151	0.399161	0	0	0	0	0	0	0	0	0	0	0	0
Ac_ciRNA_04842	0	0	0	0	0	0	0.080723	0	0	0.0850477	0	0	0.0642175	0.147467	0.155099	0	0.0408939	0.105042	0	0	0	0	0	0	0	0	0	0	0	0
Ac_ciRNA_04846	0.357836	0.541185	0.315036	0.199571	0.125441	0.358307	0	0	0.381151	0.127572	0	0	0	0	0	0	0	0	0	0	0	0	0	0	1.01843	0.768012	0.354996	0.51559	1.30321	0.795867
Ac_ciRNA_04847	0	0	0	0	0	0	0	0	0	0	0	0	0.107029	0.105333	0	0.067293	0.0408939	0.126051	0	0	0	0	0	0	0	0	0	0	0	0
Ac_ciRNA_04849	0	0	0.0393795	0.0399141	0	0.0398119	0	0	0	0	0	0	0	0	0	0	0	0	0	0	0	0	0	0	0.0664193	0.0426673	0	0.0644487	0.169984	0.0418878
Ac_ciRNA_04850	0	0	0	0	0	0	0	0	0	0	0	0	0.0428117	0.0421334	0.0443141	0.067293	0	0	0	0	0	0	0	0	0	0	0	0	0	0
Ac_ciRNA_04852	0	0	0	0	0.66902	2.82664	0	0	0	0	0	0	0	0	0	0	0	0	0	2.24142	0	1.49282	0	0	0	0	0	0	0	0
Ac_ciRNA_04853	0	0	0	0	0	0	0	0	0	0	1.78693	0	0.877639	1.05333	1.01922	1.301	1.45173	1.68068	1.28485	1.5217	1.05177	1.25074	1.29797	1.26512	0	0	0	0	0	0
Ac_ciRNA_04857	0	0	0	0	0	0	0.0605422	0	0	0.0637858	0	0	0	0	0	0	0	0	0	0	0	0	0	0	0.0442795	0.0426673	0.039444	0	0	0
Ac_ciRNA_04864	0	0	0.118138	0.0598712	0.0418137	0.0995297	0.0605422	0.039197	0.105875	0.0637858	0	0.0404687	0.0856233	0.1264	0.177256	0.112155	0	0.168068	0	0	0	0	0	0	0.0664193	0.149336	0	0.257795	0	0.230383
Ac_ciRNA_04868	0.0841968	0.112747	0	0.0598712	0	0.119436	0	0	0	0	0	0	0	0	0	0	0	0	0	0	0	0	0	0	0.0442795	0.170669	0	0.880799	0	0.733036
Ac_ciRNA_04870	0.168394	0.248043	0.118138	0	0.878089	0	0	0	0	0	0	0	0	0.147467	0.177256	0	0	0	0	0	0	0	0.212782	0.244145	0	0	0	0	0	0
Ac_ciRNA_04871	0	0	0	0	0	0	0	0	0	0	0.155385	0	0.0856233	0.168533	0	0.089724	0	0	0.0828932	0.185072	0	0	0.0851128	0.110975	0	0	0	0	0	0
Ac_ciRNA_04879	0	0	0	0	0	0	0	0	0	0	0	0	0	0	0	0	0	0	0	0	0	0	0	0	0.088559	0.0426673	0	0.0429658	0	0.146607
Ac_ciRNA_04882	0	0.0450988	0	0.0199571	0	0	0.181627	0	0.148225	0.127572	0.0388462	0.242812	0	0	0	0	0	0	0	0	0	0	0	0	0	0	0	0	0	0
Ac_ciRNA_04887	0	0	0	0	0	0	0	0	0	0	0	0	0.0856233	0	0	0	0.0408939	0.042017	0	0	0	0	0	0	0	0	0	0	0	0
Ac_ciRNA_04890	0.0841968	0.180395	0	0.0399141	0	0	0.0403615	0	0	0	0.213654	0	0.0428117	0	0.0886281	0.269172	0.143129	0.147059	0.145063	0	0.128788	0.100866	0.127669	0.288535	0	0	0	0	0	0
Ac_ciRNA_04892	0	0	0	0	0	0.0398119	0.0403615	0	0	0	0.0776925	0	0	0	0	0	0.0613408	0	0.0828932	0.0616905	0.107323	0	0.0638346	0.0665851	0	0	0.059166	0.0859316	0.0377743	0.0418878
Ac_ciRNA_04896	0	0	0	0	0	0	0	0	0	0	0	0	0	0	0	0	0	0	0	0	0	0	0	0	0	0	0.059166	0.0429658	0	0
Ac_ciRNA_04898	0	0	0.078759	0	0	0.0597178	0.0403615	0.078394	0	0.0425238	0	0.0607031	0	0	0	0	0	0	0	0	0	0	0	0	0	0.0853346	0.216942	0.0429658	0.151097	0.104719
Ac_ciRNA_04900	0	0	0	0	0	0	0	0	0	0	0	0	0.149841	0.0842667	0.155099	0.201879	0.143129	0.147059	0	0	0	0	0	0	0	0	0.157776	0	0.0377743	0.0628316
Ac_ciRNA_04901	0.0420984	0	0.0590692	0	0.0418137	0.0796238	0	0.039197	0	0.0425238	0	0.0404687	0	0	0	0	0	0	0	0	0	0	0	0	0	0	0	0	0.0377743	0.146607
Ac_ciRNA_04902	0	0	0	0	0	0.119436	0.100904	0	0	0	0	0	0	0	0	0	0	0	0	0	0	0	0.170226	0.887801	0.664193	0.384006	0	0	0	0
Ac_ciRNA_04910	0	0	0	0	0	0	0	0.039197	0.0847003	0	0	0.121406	0	0	0	0	0	0	0	0	0.128788	0.0403465	0	0	0	0	0	0	0	0
Ac_ciRNA_04912	0	0	0	0	0	0	0.080723	0	0	0	0	0.0404687	0.149841	0.147467	0	0	0	0	0	0	0	0	0	0	0	0	0	0	0	0
Ac_ciRNA_04913	0	0	0	0	0	0	0	0	0	0	0	0.222578	0	0.589867	0.332355	0	0	0.231093	0	0	0	0.282425	0.59579	0.688046	0	0	0	0	0	0
Ac_ciRNA_04917	0	0	0	0.0598712	0.0627206	0.119436	0	0	0	0	0	0	0	0	0	0	0	0	0	0	0	0	0	0	0	0	0	0	0	0
Ac_ciRNA_04919	0	0	0	0	0.33451	0.378213	0	0.607554	0	0.361453	0.835194	0	0	0	0	0	0	0	0.290126	0.534651	0.493686	0.322772	0.702181	0.754631	0	0	0	0	0	0.418878
Ac_ciRNA_04920	0	0.0901976	0	0.119742	0.0418137	0	0	0	0	0	0	0	0	0	0	0	0	0	0	0	0	0	0	0	0.221398	0	0.138054	0.193346	0	0.146607
Ac_ciRNA_04923	0	0	0	0	0	0	0	0	0	0	0	0	0.171247	0.316	0.443141	0.336465	0.408939	0.105042	0	0	0	0	0	0	0	0	0	0	0	0
Ac_ciRNA_04927	0	0	0	0	0.0418137	0.0796238	0	0	0	0	0	0.161875	0	0	0	0	0	0	0	0	0	0	0	0	0	0	0	0	0	0
Ac_ciRNA_04930	0	0	0	0	0	0.0398119	0	0	0	0	0	0	0	0	0	0	0	0	0	0	0	0	0	0	0	0	0.0986101	0.107414	0.0755486	0.0628316
Ac_ciRNA_04937	0	0	0	0	0	0	0	0	0	0	0.0776925	0	0	0	0.110785	0	0.102235	0.0840339	0	0	0	0	0	0	0	0	0	0	0	0
Ac_ciRNA_04939	0	0.0676482	0	0	0.0418137	0	0	0	0	0	0	0	0	0	0.0664711	0	0	0	0	0	0	0	0	0	0.0442795	0.0426673	0	0	0	0
Ac_ciRNA_04940	0	0	0	0	0	0	0	0	0	0	0.0388462	0	0	0	0	0	0	0	0.0621699	0	0.107323	0.161386	0	0	0	0	0	0	0	0
Ac_ciRNA_04943	0	0	0	0	0	0	0	0	0	0	0	0	0	0	0.0443141	0.044862	0	0	0	0	0	0	0	0	0	0	0	0	0	0
Ac_ciRNA_04947	0	0	0	0	0	0.0597178	0	0	0	0	0	0	0	0	0	0	0	0	0	0	0	0	0	0	0	0	0.059166	0.0644487	0	0.0418878
Ac_ciRNA_04950	0	0	0	0	0	0	0.0403615	0	0	0	0.0971156	0	0	0	0	0	0	0	0	0	0.0429292	0.0605197	0	0.110975	0	0	0	0	0	0
Ac_ciRNA_04951	0	0	0	0	0	0	0	0	0	0	0	0	0	0	0	0	0	0	0	0	0	0	0	0	0	0.0853346	0	0	0.0566614	0.0418878
Ac_ciRNA_04952	0	0	0	0	0	0	0	0	0	0	0	0	0	0	0	0	0	0	0	0	0	0	0	0	0	0	0.059166	0.0429658	0	0.0418878
Ac_ciRNA_04955	0	0	0	0	0	0	0	0.13719	0.0635252	0.170095	0.0388462	0.182109	0	0	0	0	0	0	0	0	0	0	0	0	0	0	0	0	0	0
Ac_ciRNA_04957	0	0	0	0	0	0	0.080723	0	0.0635252	0	0	0	0	0	0	0	0	0	0	0	0	0	0	0	0	0	0.118332	0.0644487	0.0944357	0
Ac_ciRNA_04959	0	0	0	0	0	0.0597178	0	0	0	0	0	0	0	0	0	0	0	0	0	0	0	0	0	0	0	0.0426673	0.039444	0.0429658	0	0.0628316
Ac_ciRNA_04962	0	0	0	0	0	0	0	0	0	0	0	0	0.192652	0.147467	0.177256	0.201879	0.286257	0.315127	0	0	0	0	0	0	0	0	0	0	0	0
Ac_ciRNA_04963	0	0	0	0	0	0	0	0	0	0	0	0	0.149841	0.316	0.199413	0.201879	0.143129	0.168068	0	0	0	0	0	0	0	0	0	0	0	0
Ac_ciRNA_04967	0	0	0	0	0	0	0	0	0	0	0	0	0	0	0	0	0	0	0	0	0	0	0	0	0	0	0.0788881	0.0429658	0	0
Ac_ciRNA_04976	0	0	0	0	0	0	0	0	0.423501	0.531548	0.524424	0.768905	0.51374	0	0	0	0.449833	0	0	0	0	0.221906	0	0	0	0	0	0	0	0
Ac_ciRNA_04982	0	0	0	0	0	0	0	0.0979925	0	0	0	0	0.0428117	0	0.0886281	0	0.204469	0.231093	0.0414466	0.34958	0	0	0	0	0	0	0.059166	0.257795	0	0
Ac_ciRNA_04995	0	0	0	0	0	0	0	0	0	0	0	0	0	0	0	0	0	0	0	0	0	0	0	0	0	0	0	0	0.0755486	0.0837755
Ac_ciRNA_04996	0	0	0	0	0	0	0	0	0.0423501	0.0637858	0	0	0	0	0	0	0	0	0	0	0	0	0	0	0	0	0	0	0	0
Ac_ciRNA_04997	0	0	0	0	0	0	0	0	0.0423501	0.0425238	0	0.101172	0.149841	0	0.0886281	0.044862	0	0.042017	0.0414466	0.0822541	0	0.0605197	0	0.0443901	0	0	0	0	0	0
Ac_ciRNA_05001	0	0	0	0	0	0	0	0	0	0	0	0	0	0	0	0	0	0.0630255	0	0	0	0	0	0	0.0442795	0.064001	0	0.0429658	0	0
Ac_ciRNA_05003	0	0	0.0393795	0	0	0	0	0	0	0	0	0	0	0	0	0	0	0	0	0	0	0	0	0	0.0442795	0.0426673	0	0	0	0
Ac_ciRNA_05004	0	0	0	0	0	0	0	0	0	0	0	0	0	0.0421334	0	0.044862	0.0408939	0.042017	0	0	0	0	0	0	0	0	0	0	0	0
Ac_ciRNA_05007	0.0420984	0	0	0	0	0	0	0.0979925	0.0635252	0.0850477	0.0388462	0	0.278276	0.210667	0.110785	0.291603	0	0	0	0	0.0429292	0	0	0	0	0	0	0	0	0
Ac_ciRNA_05009	0	0	0	0	0	0	0	0	0	0	0	0	0	0	0	0	0	0	0.12434	0.308453	0	0	0.148947	0	0	0	0	0	0	0
Ac_ciRNA_05010	0	0	0	0	0	0	0	0	0	0	0	0	0.0856233	0.0632001	0	0	0	0	0	0	0	0	0	0	0	0	0	0	0	0
Ac_ciRNA_05011	0	0.0450988	0	0	0	0.0398119	0	0	0	0	0	0.0809374	0.149841	0.1264	0.0886281	0.089724	0.143129	0.189076	0	0	0	0	0	0	0.287817	0.0853346	0.039444	0.300761	0.0944357	0.251327
Ac_ciRNA_05019	0	0.135296	0	0.0399141	0	0	0	0	0	0	0	0	0.128435	0.0421334	0.0664711	0	0	0	0	0	0	0	0	0	0.110699	0.0426673	0	0.451141	0	0.188495
Ac_ciRNA_05024	0	0	0	0	0	0	0	0	0	0	0	0	0.278276	0.168533	0.155099	0.067293	0.0408939	0.0840339	0	0	0	0	0	0	0	0	0	0	0	0
Ac_ciRNA_05029	0	0	0	0	0	0	0	0.0979925	0.105875	0.170095	0	0.0404687	0	0.105333	0.110785	0	0.224916	0.105042	0	0	0	0	0	0	0.154978	0	0	0.0644487	0	0
Ac_ciRNA_05038	0	0	0	0	0.104534	0	0	0.13719	0.0847003	0.0425238	0	0	0	0	0	0	0	0	0	0	0	0	0	0	0	0	0	0	0	0
Ac_ciRNA_05040	0	0	0	0	0	0	0	0	0	0	0	0	0	0	0	0	0	0	0	0	0	0	0	0	0	0	0.039444	0.0644487	0.0755486	0.230383
Ac_ciRNA_05041	0	0	0	0	0	0	0	0	0	0	0	0	0	0	0	0	0	0	0	0	0	0	0	0	0	0	0	0	0.0755486	0.0628316
Ac_ciRNA_05053	0	0.0450988	0.0393795	0	0	0	0.0403615	0.078394	0.0423501	0.297667	0.0388462	0.32375	0.0856233	0.0421334	0.155099	0.112155	0.0408939	0.126051	0	0	0	0	0	0	0	0	0.059166	0	0	0
Ac_ciRNA_05054	0	0	0	0	0	0	0	0	0	0	0	0	0	0	0	0	0	0	0	0	0	0	0	0	0.0442795	0	0.256386	0.15038	0.0944357	0.0837755
Ac_ciRNA_05055	0	0	0	0.0399141	0	0.0796238	0	0	0	0	0	0	0	0	0	0	0	0	0	0	0	0	0	0	0	0.0426673	0.236664	0.0859316	0.0377743	0.104719
Ac_ciRNA_05056	0	0	0	0	0	0	0.0605422	0	0	0	0.0388462	0	0	0	0	0	0	0	0	0	0	0	0	0	0	0	0.039444	0.0859316	0	0.0418878
Ac_ciRNA_05059	0	0	0	0	0	0	0	0	0	0	0	0	0	0	0	0	0	0	0	0	0	0	0	0	0	0.0853346	0.039444	0.128897	0	0
Ac_ciRNA_05062	0.0420984	0.0901976	0	0.0598712	0	0	0	0	0	0	0	0	0	0	0	0	0	0	0	0	0	0	0	0	0	0	0	0.279278	0	0.502653
Ac_ciRNA_05065	0.336787	0.0901976	0	0	0	0	0.221988	0.117591	0.0423501	0	0	0	0	0	0	0	0	0	0	0	0	0	0	0	0	0.0426673	0	0.687453	0	1.40324
Ac_ciRNA_05075	0	0	0	0	0	0	0.0605422	0	0.0847003	0	0.0388462	0	0	0.105333	0.155099	0.134586	0.102235	0	0	0	0	0	0	0	0	0	0	0	0.0755486	0
Ac_ciRNA_05078	0	0	0	0	0	0	0	0	0	0	0	0	0.107029	0.105333	0.110785	0.067293	0	0.147059	0	0	0	0	0	0	0	0	0	0	0	0
Ac_ciRNA_05083	0	0	0	0	0	0	0	0	0	0	0	0	0.0642175	0.0421334	0.0886281	0.22431	0.102235	0.0840339	0	0	0	0	0	0	0	0	0	0	0	0
Ac_ciRNA_05086	0	0	0	0	0	0	0.0403615	0.117591	0	0	0	0	0	0	0	0	0	0	0	0	0	0	0	0	0	0	0	0	0	0
Ac_ciRNA_05088	0	0	0	0	0	0	0	0	0	0	0	0	0.299682	0.210667	0.155099	0.22431	0.224916	0	0	0	0	0	0	0	0	0	0	0	0	0
Ac_ciRNA_05105	0	0	0	0	0	0	0	0	0	0	0	0	0.128435	0.0842667	0.110785	0.134586	0.122682	0.210085	0	0	0	0	0	0	0	0	0	0	0	0
Ac_ciRNA_05106	0	0	0	0	0.146348	0.0995297	0.161446	0	0	0	0	0	0	0	0	0	0	0	0	0	0	0	0	0	0	0.064001	0	0	0	0
Ac_ciRNA_05107	0	0	0	0	0	0	0	0	0	0	0.31077	0	0	0	0	0	0	0	0.227956	0.329016	0.150252	0.242079	0.404286	0.13317	0	0	0	0	0	0
Ac_ciRNA_05124	0	0	0	0	0	0	0	0	0	0	2.05885	0	0	0	0	0	0	0	0	0	1.73863	2.2594	1.8512	2.41926	0	0	0	0	0	0
Ac_ciRNA_05126	0	0	0	0	0	0	0	0	0	0	0	0	0	0	0	0	0	0	0	0	1.60985	1.57351	0	0	0	0	0	0	0	0
Ac_ciRNA_05127	0	0	0	0	0	0	0	0	0.0423501	0.0425238	0	0	0	0	0	0	0	0	0	0	0	0	0	0	0	0	0	0	0	0
Ac_ciRNA_05128	0	0.0450988	0	0	0	0	0.0403615	0	0	0	0	0.0404687	0	0.0842667	0.265884	0.112155	0	0.210085	0	0	0	0	0	0	0	0	0	0	0.0377743	0
Ac_ciRNA_05129	0.0420984	0	0.0590692	0.0399141	0	0.0398119	0.181627	0.0587955	0.0635252	0.0637858	0.0582694	0	0	0.210667	0.110785	0.067293	0	0.0630255	0	0	0	0	0	0	0.0442795	0.170669	0	0.193346	0	0
Ac_ciRNA_05132	0.0631476	0	0.118138	0.0798283	0	0.0597178	0.161446	0.0979925	0.0423501	0.0637858	0.0388462	0.242812	0	0	0	0	0	0	0	0	0	0	0	0	0	0.320005	0	0.193346	0	0
Ac_ciRNA_05135	0	0	0	0	0	0	0	0	0	0	0	0	0	0	0	0	0	0	0	0	0	0	0	0	0.177118	0.106668	0	0.0859316	0	0.0837755
Ac_ciRNA_05141	0	0	0	0	0	0	0	0	0	0	0	0	0	0	0	0	0	0	0.145063	0.143945	0.171717	0	0	0	0	0	0	0	0	0
Ac_ciRNA_05146	0	0	0	0	0	0	0	0	0	0	0.0388462	0	0	0	0	0	0	0	0.207233	0.143945	0.0429292	0.0403465	0.148947	0	0	0	0	0	0	0
Ac_ciRNA_05149	0	0	0	0	0	0	0.100904	0.039197	0	0	0	0	0	0	0	0	0	0.0840339	0	0	0	0	0	0	0	0	0	0	0	0
Ac_ciRNA_05150	0	0	0.0984487	0.0598712	0	0.0796238	0.121084	0.0979925	0.148225	0.212619	0.0388462	0.546328	0	0	0	0	0	0	0	0	0	0	0	0	0	0.0853346	0.236664	0.107414	0.0566614	0.335102
Ac_ciRNA_05151	0	0	0	0	0	0	0	0	0	0	0	0	0	0	0	0	0	0	0	0	0	0	0	0	0	0	0.157776	0.0429658	0.0566614	0
Ac_ciRNA_05159	0	0.0450988	0	0	0	0	0	0	0.0423501	0	0.0971156	0	0.107029	0	0.0443141	0	0	0.0840339	0.207233	0	0.150252	0.100866	0.0638346	0.26634	0	0	0	0	0	0
Ac_ciRNA_05170	0	0	0	0	0	0	0	0	0.211751	0	0	0.0809374	0.25687	0.1264	0	0	0.245363	0	0	0	0	0	0	0	0	0	0	0	0	0
Ac_ciRNA_05190	0	0	0	0	0	0	0	0	0	0	0	0	0	0	0	0	0	0	0	0	0	0	0	0	0.0442795	0.0426673	0	0	0	0
Ac_ciRNA_05192	0	0	0	0	0	0	0	0	0	0	0	0	0.321087	0.168533	0.243727	0	0.0408939	0.126051	0	0	0	0	0	0	0	0	0	0	0	0
Ac_ciRNA_05193	0	0	0	0	0	0	0	0	0	0	0	0	0	0	0.155099	0	0.0817877	0.147059	0	0	0	0	0	0	0	0	0	0	0	0
Ac_ciRNA_05194	0	0	0	0	0	0	0	0	0	0	0	0	0.278276	0.1896	0.177256	0.157017	0.102235	0.168068	0	0	0	0	0	0	0	0	0	0	0	0
Ac_ciRNA_05197	0	0	0	0	0	0	0	0	0	0	0	0	0	0.0632001	0	0	0.143129	0.168068	0	0	0	0	0	0	0	0	0	0	0	0
Ac_ciRNA_05202	0	0	0	0	0	0	0	0	0	0	0	0	0	0	0	0	0.0408939	0.0630255	0	0	0	0	0	0	0	0	0	0	0	0
Ac_ciRNA_05208	0	0	0	0	0	0	0	0.039197	0.254101	0.127572	0	0.607031	0	0	0	0	0	0	0	0	0	0	0	0	0	0	0	0	0	0
Ac_ciRNA_05210	0	0	0	0	0	0	0	0	0	0	0	0	0	0.147467	0	0	0.102235	0.0840339	0	0	0	0	0	0	0	0	0	0	0	0
Ac_ciRNA_05216	0	0	0	0	0	0.0398119	0	0	0	0	0	0	0	0	0	0	0	0	0	0	0	0	0	0	0	0.064001	0.059166	0.0644487	0.0377743	0
Ac_ciRNA_05224	0	0	0	0	0	0	0	0	0	0	0	0	0	0	0	0	0	0	0	0	0.150252	0.100866	0	0	0	0	0	0	0	0
Ac_ciRNA_05228	0	0	0	0	0	0	0	0	0	0	0	0	0.0642175	0.0421334	0.0664711	0.044862	0.0408939	0.042017	0	0	0	0	0	0	0	0	0	0	0	0
Ac_ciRNA_05229	0	0	0	0	0	0	0	0	0	0	0	0	0.0856233	0.1264	0.0443141	0	0	0.0840339	0	0	0	0	0	0	0	0	0	0	0	0
Ac_ciRNA_05232	0	0	0	0	0	0.0398119	0	0	0	0	0	0	0	0	0	0	0	0	0	0	0	0	0	0	0.088559	0	0	0.0644487	0.0377743	0.0418878
Ac_ciRNA_05238	0	0	0	0	0	0	0.0605422	0	0	0	0	0	0	0.0421334	0	0	0.0408939	0	0	0	0	0	0.0425564	0.0665851	0	0.0426673	0	0	0	0
Ac_ciRNA_05239	0	0	0	0	0	0	0	0.039197	0.105875	0.148833	0	0	0	0.0421334	0.0886281	0.067293	0.163575	0.0630255	0	0	0	0	0	0	0	0.0426673	0	0.0429658	0	0.0837755
Ac_ciRNA_05240	0	0	0	0	0	0	0	0	0	0	0.0971156	0	0	0	0	0	0	0	0.145063	0.102818	0.0858584	0.121039	0	0.0887801	0	0	0	0	0	0
Ac_ciRNA_05244	0	0	0	0	0	0	0	0	0	0	0.0388462	0	0	0	0.0443141	0	0.0613408	0	0.18651	0.164508	0.107323	0.161386	0.0851128	0.0887801	0	0	0	0	0	0
Ac_ciRNA_05246	0	0	0	0	0	0	0	0	0	0	0.0388462	0.0607031	0	0	0	0	0	0	0	0	0	0	0	0	0	0	0.0986101	0.0429658	0	0
Ac_ciRNA_05248	0	0	0	0	0	0	0	0	0	0	0	0	0.128435	0.0421334	0.110785	0.067293	0.102235	0	0	0	0	0	0	0	0	0	0	0	0	0
Ac_ciRNA_05249	0.0420984	0.0450988	0	0	0	0	0	0.0587955	0	0	0	0	0	0	0	0	0	0	0	0	0	0	0	0	0	0	0	0	0	0.0418878
Ac_ciRNA_05253	0	0	0	0	0	0	0	0	0	0	0	0	0	0	0	0	0	0	0.0414466	0.123381	0.107323	0.0605197	0	0.0443901	0	0	0	0	0	0
Ac_ciRNA_05256	0	0	0	0	0	0	0	0	0.0423501	0.0425238	0	0	0	0	0	0	0	0	0	0	0	0	0	0	0	0	0	0	0	0
Ac_ciRNA_05258	0	0	0	0	0	0	0	0	0	0	0	0	0.0856233	0.147467	0	0	0	0.042017	0	0	0	0	0	0	0	0	0	0	0	0
Ac_ciRNA_05259	0	0.0450988	0.0590692	0.119742	0	0	0.121084	0.0979925	0.0635252	0.148833	0	0	0	0	0	0	0	0	0	0	0	0	0	0	0.132839	0.277337	0.216942	0.171863	0.0755486	0.104719
Ac_ciRNA_05263	0	0	0	0	0	0	0	0	0	0	0	0	0.0428117	0	0	0	0.0613408	0.042017	0	0	0	0	0	0	0	0	0	0	0	0
Ac_ciRNA_05264	0	0	0	0	0	0	0	0.725145	0	1.10562	1.32077	0.445156	0	0	0	0	0	0	1.26412	1.78903	1.11616	1.21039	0.808572	1.39829	0	0	0	0	0	0
Ac_ciRNA_05271	0	0	0	0	0	0	0	0	0	0	0	0	0	0	0	0	0	0	0	0	0	0	0	0	0	0	0.059166	0	0.0377743	0.0628316
Ac_ciRNA_05273	0	0	0	0	0	0	0	0	0	0	0	0	0.0428117	0.0632001	0	0	0	0	0	0	0	0	0	0	0	0	0	0	0	0
Ac_ciRNA_05274	0	0.0450988	0	0.0598712	0.0418137	0	0	0.0587955	0	0	0	0	0	0	0	0	0	0	0	0	0	0	0	0	0.088559	0.106668	0	0.0859316	0	0.167551
Ac_ciRNA_05278	0	0	0	0	0	0	0	0	0	0.0425238	0	0	0	0	0	0	0	0	0	0	0	0	0	0	0	0	0.059166	0.0429658	0.0377743	0.0628316
Ac_ciRNA_05280	0	0	0	0	0	0	0	0	0	0	0	0	0	0	0	0	0	0	0.0414466	0.0616905	0	0	0	0	0	0	0	0	0	0
Ac_ciRNA_05284	0	0	0	0	0	0	0	0	0	0	0	0	0	0	0	0	0	0	0.0621699	0.041127	0.0429292	0	0	0	0	0	0	0	0	0
Ac_ciRNA_05285	0	0	0.0393795	0	0.0627206	0.0597178	0.0605422	0.039197	0	0.0425238	0	0	0	0	0	0	0	0	0	0	0	0	0	0	0	0.128002	0.0788881	0	0.0377743	0.104719
Ac_ciRNA_05289	0	0	0	0	0	0	0	0	0	0	1.49558	0	0	0	0	0	0	0	1.5128	1.56283	0.472221	1.63403	2.08526	2.2417	0	0	0	0	0	0
Ac_ciRNA_05293	0	0	0	0	0	0	0	0	0.0423501	0	0	0	0.0642175	0.0421334	0.0443141	0.089724	0.102235	0.0630255	0	0.041127	0	0	0	0	0	0.0426673	0	0	0	0
Ac_ciRNA_05295	0	0	0	0.0399141	0	0	0	0	0	0	0	0	0	0	0	0	0	0	0	0	0	0	0	0	0	0.0853346	0.0788881	0	0.0566614	0.146607
Ac_ciRNA_05303	0	0	0	0.0399141	0	0.0398119	0	0	0	0	0	0.0607031	0	0	0	0	0	0	0	0	0	0	0	0	0.0442795	0.064001	0.157776	0.236312	0.226646	0.146607
Ac_ciRNA_05305	0	0	0	0	0	0	0	0	0	0	0	0	0.0642175	0.0632001	0	0	0	0	0	0	0	0	0	0	0	0	0.039444	0	0	0
Ac_ciRNA_05307	0	0.0676482	0	0.0399141	0	0.0398119	0.0403615	0	0	0	0	0	0	0	0	0	0	0	0	0	0	0	0	0	0.154978	0.23467	0.039444	0.128897	0	0.188495
Ac_ciRNA_05311	0	0	0	0	0	0	0	0	0	0	0	0	0	0	0	0	0	0	0	0	0	0	0	0	0	0	0.315552	0.537072	0	0
Ac_ciRNA_05321	0	0	0	0	0	0	0	0	0	0	0	0	0.149841	0.105333	0.0664711	0.179448	0.122682	0.042017	0	0	0	0	0	0	0	0	0	0	0	0
Ac_ciRNA_05324	0	0	0	0	0	0	0	0	0	0	0	0	0	0.0421334	0.0664711	0.067293	0.0408939	0.0840339	0	0	0	0	0	0	0	0	0	0	0	0
Ac_ciRNA_05331	0	0.0676482	0	0	0	0.0995297	0	0	0	0	0	0	0	0	0	0	0	0	0	0	0	0	0	0	0	0.106668	0.118332	0.128897	0	0.104719
Ac_ciRNA_05337	0	0.0450988	0	0	0	0	0	0	0	0	0	0	0	0	0	0	0	0	0	0	0	0	0	0	0	0	0.039444	0.0644487	0	0.0418878
Ac_ciRNA_05341	0	0	0	0	0	0	0	0	0	0	0	0	0	0	0	0	0	0	0	0	0	0	0	0	0	0	0.059166	0	0.0377743	0.0418878
Ac_ciRNA_05350	0.126295	0	0.0984487	0.179614	0.0627206	0.139342	0.221988	0	0	0	0	0	0	0	0	0	0	0	0	0	0	0	0	0	0	0.149336	0	0	0	0
Ac_ciRNA_05358	0.0631476	0.112747	0.0590692	0.0399141	0.167255	0.278683	0.0403615	0.13719	0.254101	0.191357	0.0582694	0.182109	0.128435	0.0421334	0.155099	0.179448	0.163575	0.105042	0	0	0	0.0403465	0.0425564	0	0.199258	0.554675	1.28193	0.687453	0.774373	1.08908
Ac_ciRNA_05359	0	0	0	0	0	0	0.0403615	0.0979925	0	0.0425238	0	0	0.385305	0.1896	0.155099	0.067293	0.368045	0.189076	0.0414466	0	0	0	0	0	0	0	0	0	0	0
Ac_ciRNA_05375	0	0	0	0	0	0	0	0	0	0	0	0	0	0.0421334	0	0	0.0613408	0.0630255	0	0	0	0	0	0	0	0	0	0	0	0
Ac_ciRNA_05390	0	0	0	0	0	0	0	0	0	0	0	0	0	0	0	0	0	0	0	0	0	0	0	0	0.177118	0.064001	0	0	0	0
Ac_ciRNA_05392	0	0	0	0	0	0	0	0	0.105875	0	0.0971156	0.182109	0	0	0	0	0	0	0	0	0	0	0	0	0	0	0	0	0	0
Ac_ciRNA_05395	0	0	0	0	0	0	0	2.37142	2.56218	2.65774	1.70923	0	6.57159	5.45627	5.40631	7.85085	12.1046	6.02944	0	0	0	0	0	0	0	0	0	0	0	0
Ac_ciRNA_05398	0	0	0	0	0	0	0	0.078394	0.0847003	0.0850477	0	0.0607031	0	0	0	0	0	0	0	0	0	0	0	0	0	0	0	0	0	0
Ac_ciRNA_05409	0	0	0	0.0399141	0	0	0	0	0	0	0	0	0	0	0	0	0.0408939	0	0	0	0	0	0	0	0.154978	0.192003	0.315552	0.408175	0.0755486	0.733036
Ac_ciRNA_05412	0	0	0	0	0	0.0398119	0	0	0	0	0	0	0	0	0	0	0	0	0	0	0	0	0	0	0.199258	0	0.0986101	0.171863	0.113323	0.230383
Ac_ciRNA_05415	0	0	0	0	0	0	0	0	0	0	0	0	0.0856233	0	0.0443141	0.067293	0.0408939	0	0	0	0	0	0	0	0	0	0	0	0	0
Ac_ciRNA_05419	0	0	0	0	0	0	0	0	0	0	0.0776925	0	0	0	0	0	0	0	0.0621699	0.164508	0.0643938	0	0.0638346	0	0	0	0	0	0	0
Ac_ciRNA_05423	0	0	0	0	0	0.119436	0	0	0	0.0850477	0	0	0.0642175	0.0842667	0	0.157017	0.0613408	0	0	0	0	0	0	0	0.132839	0.682677	0.335274	0	0.0944357	0
Ac_ciRNA_05425	0	0	0	0	0	0	0	0	0	0	0	0	0	0	0	0	0	0	0	0	0	0	0	0	0	0	0.0986101	0.0644487	0	0
Ac_ciRNA_05428	0	0	0	0	0	0	0	0	0	0.0637858	0	0	0	0	0	0	0	0.0630255	0	0	0	0	0	0	0.0442795	0.256004	0	0	0	0
Ac_ciRNA_05429	0	0	0	0	0	0	0	0	0	0	0	0	0	0	0	0	0	0	0	0	0	0	0	0	0.819171	1.30135	0	0	0	0
Ac_ciRNA_05433	0	0	0	0	0	0	0.161446	0	0	0	0.330193	0	0	0	0	0.089724	0	0	0.18651	0	0	0.161386	0.191504	0.26634	0	0	0.39444	0	0.13221	0
Ac_ciRNA_05439	0	0	0	0	0	0	0	0	0	0.297667	0	0.505859	0	0	0	0	0.347598	0	0	0	0	0.282425	0.936241	1.57585	0	0	1.04527	0	0	0
Ac_ciRNA_05447	0.189443	0.157846	0.196897	0	0	0.278683	0	0.156788	0	0	0.213654	0.343984	0	0	0	0	0	0	0.18651	0.287889	0.171717	0.201732	0.255338	0.31073	0.686332	0.789345	0.39444	0.386692	0.339968	0.64926
Ac_ciRNA_05453	0	0	0	0	0	0	0	0	0	0	0.796348	0	0	0	0	0	0	0	0.580253	0.781414	0.643938	0.665717	0.383008	0.799021	0	0	0	0	0	0
Ac_ciRNA_05458	0	0	0	0	0	0	0	0	0	0	0	0	0.321087	0.294934	0.265884	0.246741	0.388492	0	0	0	0	0	0	0	0.0664193	0.106668	0.0788881	0	0.0566614	0.0628316
Ac_ciRNA_05460	0	0	0	0	0	0	0	0	0	0	0	0	1.07029	0.926934	0.576083	0.650499	0.408939	0.588238	0	0	0	0	0	0	0	0	0	0	0	0
Ac_ciRNA_05462	0	0	0	0	0	0	0.080723	0	0	0	0	1.4164	0	9.35361	0	11.7314	11.6139	17.1849	0.0414466	0	0	0	0	0	0	0	0	0	0	0
Ac_ciRNA_05464	0	0	0	0	0	0	0	0	0	0	0	0.607031	0	0	0	0	0	10.1261	0	0	0.429292	0	0.212782	0.754631	0	0	0	0	0	0
Ac_ciRNA_05479	0	0	0	0	0	0	0	0	0	0	0	0	0	0	0	0	0	0	0	0	0	0	0	0	0	0.0426673	0.0788881	0	0.0377743	0.0418878
Ac_ciRNA_05480	0	0	0	0	0	0	0	0.235182	0.0423501	0.0637858	0	0	0	0	0	0	0	0	0	0	0	0	0	0	0	0	0	0	0	0
Ac_ciRNA_05481	0	0	0	0	0	0	0.0605422	0	0	0	0	0	0	0	0	0	0	0	0	0	0	0	0	0	0	0.0853346	0.0788881	0	0.0944357	0.0628316
Ac_ciRNA_05486	0	0	0	0	0	0	0	0.117591	0.0635252	0.148833	0	0.0404687	0	0	0	0	0	0	0	0	0	0	0	0	0	0	0	0	0	0
Ac_ciRNA_05492	0.0420984	0.0450988	0	0	0	0	0	0	0	0	0	0.0404687	0	0	0	0	0	0	0	0	0	0	0	0	0.0442795	0	0	0.0644487	0	0
Ac_ciRNA_05498	0	0	0	0	0	0	0	0	0	0	0	0	0.663581	0.484534	0.376669	0.874809	1.16548	0.126051	0	0	0	0.0403465	0	0	0	0	0	0	0	0
Ac_ciRNA_05501	0.0631476	0.0450988	0	0.0399141	0	0	0.181627	0	0	0.0637858	0	0.14164	0	0	0	0	0	0	0	0	0	0	0	0	0.154978	0.490674	0.374718	0.214829	0.113323	0.167551
Ac_ciRNA_05503	0	0	0	0	0	0	0	0	0	0	0	0	0.0428117	0	0.0443141	0.044862	0	0.042017	0	0	0	0	0	0	0	0	0	0	0	0
Ac_ciRNA_05504	0	0	0.0393795	0	0	0	0.141265	0	0.0423501	0.10631	0	0	0	0	0	0	0	0	0	0	0	0	0	0	0	0	0	0	0	0
Ac_ciRNA_05505	0	0	0.0393795	0.0598712	0	0.0398119	0.26235	0	0	0	0	0	0	0	0	0	0	0	0	0	0	0	0	0	0	0	0	0.0644487	0	0
Ac_ciRNA_05510	0.0841968	0.0676482	0	0	0	0	0	0	0	0	0	0	0	0	0	0	0	0	0	0	0	0	0	0	0	0	0	0	0	0
Ac_ciRNA_05514	0.0420984	0.0676482	0	0	0	0.0398119	0	0.078394	0.0423501	0	0.0388462	0	0	0	0	0.044862	0	0	0	0	0	0	0	0	0.0442795	0.23467	0.414162	0.15038	0.358856	0.167551
Ac_ciRNA_05529	0	0	0	0	0	0.0398119	0.0403615	0	0	0	0	0	0	0	0	0	0	0	0	0	0	0	0	0	0.088559	0	0.236664	0	0.0566614	0.104719
Ac_ciRNA_05532	0	0	0	0.0598712	0.104534	0.119436	0	0	0	0	0	0	0	0	0	0	0	0	0	0	0	0	0	0	0.132839	0.064001	0.059166	0	0.0377743	0
Ac_ciRNA_05539	0	0	0	0	0	0	0	0.039197	0	0.0637858	0.0388462	0.0404687	0	0	0	0	0	0	0	0	0	0	0	0	0	0	0	0	0	0
Ac_ciRNA_05540	0	0.0450988	0.0590692	0	0	0	0	0	0	0	0	0	0	0	0	0	0	0	0	0	0	0	0	0	0.243537	0	0.19722	0	0.0755486	0.167551
Ac_ciRNA_05546	0	0	0	0	0	0	0	0	0	0	0	0	0	0	0	0	0	0	0	0	0.171717	0.342945	0.212782	0.26634	0	0	0	0	0	0
Ac_ciRNA_05547	0	0	0	0	0	0	0	0	0.12705	0	0	0	0.342493	0.1896	0.420983	0	0.776984	0.378153	0	0	0	0	0	0	0	0	0	0	0	0
Ac_ciRNA_05549	0	0	0	0	0	0	0	0	0	0	0	0	0.0856233	0	0.0886281	0.067293	0	0	0	0	0	0	0	0	0	0	0	0	0	0
Ac_ciRNA_05554	0	0	0	0	0	0	0	0	0	0	0	0	0.171247	0.210667	0.199413	0.157017	0	0	0	0	0	0	0	0	0	0	0	0	0	0
Ac_ciRNA_05555	0	0	0	0	0	0	0	0.117591	0	0	0	0	0.363899	0.547734	0.22157	0.246741	0	0	0	0	0	0	0	0	0	0	0	0	0	0
Ac_ciRNA_05556	0	0	0	0	0	0	0	0	0.0847003	0	0	0	0.149841	0.1896	0	0.291603	0	0.147059	0	0	0	0	0	0	0	0	0	0	0	0
Ac_ciRNA_05560	0	0	0	0	0	0	0	0	0	0	0	0	0.0428117	0.0421334	0	0	0.0408939	0	0	0	0	0	0	0	0	0	0	0	0	0
Ac_ciRNA_05565	0	0	0	0	0	0	0	0	0	0	0	0	0.25687	0.168533	0.177256	0.201879	0.0817877	0.168068	0	0	0	0	0	0	0	0	0	0	0	0
Ac_ciRNA_05572	0	0	0	0	0	0	0	0.0587955	0.0423501	0.0850477	0	0.0404687	0	0	0	0	0	0	0.0828932	0.0822541	0	0	0.0425564	0	0	0	0	0	0	0
Ac_ciRNA_05578	0	0	0	0	0	0	0	0	0	0	0	0	0	0	0	0	0	0	0	1.48057	2.27525	2.54183	0.340451	0.754631	0	0	0	0	0	0.0628316
Ac_ciRNA_05583	0	0	0	0	0	0	0	0	0	0	0	0	0	0	0.0664711	0.089724	0.0613408	0.042017	0	0	0	0	0	0	0	0	0	0	0	0
Ac_ciRNA_05587	0	0	0	0	0	0	0	0	0	0	0	0	0	0	0	0.067293	0.0408939	0.042017	0	0	0	0	0	0	0	0	0.059166	0	0.0377743	0
Ac_ciRNA_05588	0	0	0	0	0	0	0	0	0	0	0	0	0.128435	0.0421334	0	0	0.0408939	0.042017	0	0	0	0	0	0	0	0	0	0	0	0
Ac_ciRNA_05589	0.0420984	0.0450988	0.0590692	0	0.0627206	0.0398119	0	0	0	0	0.0971156	0.0607031	0.107029	0.168533	0	0	0.143129	0.0840339	0.0621699	0.0616905	0.0429292	0.080693	0	0.0887801	0.0442795	0	0.0788881	0.0859316	0.0566614	0.125663
Ac_ciRNA_05591	0	0	0	0	0	0	0	0	0.0423501	0.0425238	0	0	0	0	0	0	0	0	0	0	0	0	0	0	0	0	0	0	0	0
Ac_ciRNA_05596	0	0	0	0	0	0	0	0	0	0	0.0388462	0	0	0	0	0	0	0	0.12434	0.102818	0.0858584	0.080693	0	0.0665851	0	0	0	0	0	0
Ac_ciRNA_05597	0	0	0	0	0	0	0	0	0	0	0	0	0.0642175	0.0632001	0.0664711	0.044862	0	0.0630255	0	0	0	0	0	0	0	0	0	0	0	0
Ac_ciRNA_05598	0.294689	0.293142	0.0984487	0.159657	0.125441	0.258777	0.484338	0.803539	0.719952	0.786691	0.116539	0.566562	0.620769	0.316	0.465298	0.246741	0.388492	0.378153	0.18651	0.102818	0.107323	0.262252	0.212782	0.26634	0.0442795	0.106668	0.039444	0	0.113323	0.293214
Ac_ciRNA_05607	0	0	0	0	0	0	0	0	0	0	0	0	0.0428117	0.0421334	0.0443141	0	0	0	0	0	0	0	0	0	0	0	0	0	0	0.0628316
Ac_ciRNA_05610	0	0	0	0	0	0	0	0	0	0	0	0	0	0	0	0	0	0	0	0	0	0	0	0	0	0	0.039444	0.107414	0	0.0837755
Ac_ciRNA_05616	0	0	0	0	0	0	0.121084	0	0	0	0	0	0	0	0	0	0	0	0	0	0	0	0	0	0	0.064001	0.039444	0.128897	0.0566614	0.0418878
Ac_ciRNA_05621	0	0.0676482	0	0	0	0	0.100904	0	0.0847003	0	0	0	0.0856233	0.1896	0.110785	0.112155	0.143129	0.0840339	0	0	0	0	0	0	0	0	0.039444	0	0	0
Ac_ciRNA_05623	0	0	0	0	0	0	0	0	0	0	0	0	6.78565	11.1021	2.88041	0	1.04279	0.252102	0	0	0	0	0	0	0	0	0	0	0	0
Ac_ciRNA_05627	0	0	0	0	0	0	0	0	0	0.0850477	0	0	0	0	0	0	0	0	0	0	0	0	0	0	0	0	0	0.0429658	0.0377743	0.0418878
Ac_ciRNA_05629	0	0	0	0	0	0	0	0.117591	0.105875	0.10631	0	0.283281	0	0	0	0	0	0	0	0	0	0	0	0	0	0	0	0	0	0
Ac_ciRNA_05640	0	0	0	0	0	0	0	0	0	0	0	0	0	0	0	0	0	0	0	0.185072	0.0858584	0.121039	0.0638346	0.110975	0	0	0	0	0	0
Ac_ciRNA_05646	0	0	0	0	0	0	0	0	0	0	0	0	0.0428117	0	0	0	0	0	0.207233	0.34958	0.300505	0.242079	0.148947	0.22195	0	0	0	0	0	0
Ac_ciRNA_05647	0	0	0	0	0	0	0	0	0	0	0	0	0.235464	0.0842667	0.177256	0.201879	0.0408939	0.0630255	0	0	0	0	0	0	0	0	0	0	0	0
Ac_ciRNA_05650	0	0	0	0	0	0	0	0	0	0	0	0	0.0642175	0.0632001	0	0	0	0	0	0	0	0	0	0	0	0	0	0	0	0
Ac_ciRNA_05653	0	0	0	0	0	0	0	0	0	0	0	0	0	0	0	0	0	0	0	0.123381	0.0429292	0.0403465	0	0	0	0	0	0	0	0
Ac_ciRNA_05654	0	0	0	0	0	0	0	0	0	0	0	0	0.0642175	0.0421334	0.0664711	0.134586	0.143129	0.105042	0	0.0822541	0.0858584	0	0.0851128	0	0	0	0	0	0	0
Ac_ciRNA_05656	0	0	0	0	0	0	0	0	0	0	0	0	0	0	0	0	0	0	0.0621699	0.041127	0.128788	0	0	0	0	0	0	0	0	0
Ac_ciRNA_05666	0	0	0	0	0	0	0	0	0	0	0	0.0404687	0.0428117	0.0632001	0.0664711	0	0	0	0.0828932	0	0	0.141213	0.0851128	0.0665851	0	0	0	0	0	0
Ac_ciRNA_05670	0	0	0	0	0	0	0	0	0	0	0	0	0.0856233	0.0421334	0	0.089724	0	0	0	0	0	0	0	0	0	0	0	0	0	0
Ac_ciRNA_05671	0	0	0	0	0	0	0	0.156788	0.169401	0.0637858	0	0	0	0	0	0	0	0	0	0	0	0	0	0	0	0	0	0	0	0
Ac_ciRNA_05675	0	0	0	0	0	0	0	0	0	0	0	0	0.0428117	0.0421334	0	0	0	0	0	0	0	0	0	0	0	0	0	0	0	0
Ac_ciRNA_05676	0	0	0	0.119742	0.209069	0.199059	0.242169	0.313576	0.423501	0.255143	0.330193	0	0	0	0	0.089724	0	0.0840339	0.103617	0.143945	0.0429292	0	0	0.0887801	0.376376	0.341338	0	0.494107	0.26442	0.167551
Ac_ciRNA_05677	0	0.202945	0	0.159657	0.188162	0.0995297	0.383434	0	0	0	0.0971156	0	0	0	0	0	0	0	0	0	0	0	0	0	0	0.298671	0.49305	0.794867	0.13221	0.104719
Ac_ciRNA_05678	0	0.0676482	0	0.159657	0.0627206	0.0398119	0.141265	0	0.0635252	0.0637858	0	0	0	0	0	0	0	0	0	0	0	0	0	0	0.0442795	0.0853346	0	0	0	0
Ac_ciRNA_05679	0	0	0	0	0.0418137	0	0	0	0	0	0	0	0	0	0	0	0	0	0	0	0	0	0	0	0.0664193	0.0426673	0	0.128897	0	0
Ac_ciRNA_05681	0	0.202945	0	0.159657	0.229976	0.298589	0.28253	0	0	0	0	0	0	0	0	0	0	0	0	0	0	0	0	0	0.332096	0.213337	0	0.923765	0	0
Ac_ciRNA_05696	0	0	0	0	0	0	0	0	0.0423501	0	0	0	0.0642175	0	0	0	0	0	0	0	0	0	0	0	0	0	0.828325	0.0859316	0.245533	0
Ac_ciRNA_05699	0	0	0	0	0	0	0	0	0	0	0	0	0	0	0	0	0	0	0	0	0	0	0	0	0	0.0426673	0.157776	0.0429658	0	0
Ac_ciRNA_05702	0	0.112747	0	0.0598712	0.0627206	0	0	0.0587955	0.0635252	0.0425238	0	0	0	0	0	0	0	0	0	0	0	0	0	0	0.088559	0.170669	0	0.107414	0	0.230383
Ac_ciRNA_05703	0	0	0	0	0	0	0	0	0	0	0	0	0	0	0.0886281	0.089724	0.0817877	0.042017	0	0	0	0	0	0	0	0	0	0	0	0
Ac_ciRNA_05704	0	0	0	0	0	0	0	0	0	0	0	0	0.214058	0.231734	0.132942	0.112155	0.0817877	0.147059	0	0	0	0	0	0	0	0	0	0	0	0
Ac_ciRNA_05705	0	0	0	0	0	0	0	0	0	0	0	0	0.149841	0.210667	0.110785	0	0.0408939	0.147059	0	0	0	0	0	0	0	0	0	0	0	0
Ac_ciRNA_05711	0	0	0	0	0	0	0	0	0	0	0	0	0.0428117	0	0	0	0	0	0	0	0	0	0	0	0	0	0.019722	0.0429658	0	0
Ac_ciRNA_05714	0	0	0	0	0	0.0398119	0.100904	0	0	0	0	0	0	0	0	0	0	0	0	0	0	0	0	0	0.110699	0.106668	0.138054	0.0429658	0.0377743	0.0418878
Ac_ciRNA_05724	0	0	0	0	0	0	0	0	0	0	0	0	0.0642175	0.0842667	0	0	0	0	0	0	0	0	0	0	0	0	0	0	0	0
Ac_ciRNA_05727	0	0	0	0	0	0	0	0.117591	0.148225	0.191357	0.0388462	0.14164	0	0	0	0	0	0	0	0	0	0	0	0	0	0	0	0	0	0
Ac_ciRNA_05728	0	0	0	0	0	0	0	0	0	0	0	0	0	0	0	0	0	0	0	0	0	0	0	0	0	0	0	0.0644487	0.0755486	0.0628316
Ac_ciRNA_05731	0	0	0	0	0	0	0	0	0	0	0	0	0.235464	0.0842667	0.199413	0.22431	0.224916	0.105042	0	0	0	0	0	0	0	0	0	0	0	0
Ac_ciRNA_05732	0	0	0	0	0	0	0	0	0	0	0	0	0.0428117	0	0.132942	0.089724	0	0.147059	0	0.041127	0	0	0	0	0	0	0	0	0	0
Ac_ciRNA_05733	0	0	0	0	0	0	0	0	0	0	0	0.0404687	0.214058	0.0842667	0.110785	0	0.306704	0.126051	0	0	0	0	0	0	0	0	0.039444	0.107414	0	0
Ac_ciRNA_05734	0	0	0	0	0	0	0	0.195985	0.254101	0.0637858	0	0.101172	0	0	0	0	0	0	0	0	0	0	0	0	0	0	0	0	0	0
Ac_ciRNA_05739	0	0	0	0	0	0	0	0	0	0	0.135962	0	0	0	0	0	0	0	0	0	0	0.121039	0.361729	0.244145	0	0	0	0	0	0
Ac_ciRNA_05748	0	0	0	0	0	0	0	0	0	0	0	0	0.0856233	0	0	0	0.0613408	0.042017	0	0	0	0	0	0	0	0	0	0	0	0
Ac_ciRNA_05749	0	0	0	0.0798283	0	0	0	0	0	0	0	0	0.342493	0.358134	0.332355	0.134586	0	0.147059	0.0828932	0	0	0	0.297895	0.0887801	0	0	0	0	0	0
Ac_ciRNA_05751	0	0	0	0	0	0	0	0	0	0	0	0	0	0	0	0	0	0	0.12434	0	0.128788	0.121039	0	0	0	0	0	0	0	0
Ac_ciRNA_05752	0	0	0	0	0	0	0	0	0	0	0	0	0	0	0	0	0	0	0.0414466	0	0	0	0.106391	0.0887801	0	0	0	0	0	0
Ac_ciRNA_05754	0	0	0	0	0	0	0	0	0	0	0.135962	0	0	0	0	0	0	0	0.24868	0.267326	0.128788	0	0.297895	0.244145	0	0	0	0	0	0
Ac_ciRNA_05759	0	0	0	0	0	0	0	0	0	0	0	0	0	0	0	0	0	0	0	0	0.0429292	0.0403465	0	0	0	0	0	0	0	0
Ac_ciRNA_05765	0.0631476	0.0676482	0	0.0997853	0.0627206	0.0796238	0	0.0587955	0	0	0.0388462	0	0	0	0	0	0	0	0	0	0	0	0	0.0665851	0.0664193	0.0853346	0	0.193346	0	0.188495
Ac_ciRNA_05768	0	0	0	0	0	0	0	0.0587955	0.0635252	0.0850477	0	0	0	0	0	0	0	0	0	0	0	0	0	0	0	0	0	0	0	0
Ac_ciRNA_05772	0	0	0	0	0	0	0	0	0	0	0	0	0	0.0632001	0.0443141	0.089724	0.0408939	0	0	0	0	0	0	0	0	0	0	0	0	0
Ac_ciRNA_05774	0	0	0	0	0	0	0	0.117591	0.0847003	0.0425238	0	0	0	0.0421334	0	0.044862	0	0	0	0	0	0	0	0	0	0	0	0	0	0
Ac_ciRNA_05776	0	0.0450988	0	0.0399141	0	0	0	0	0.0635252	0.148833	0	0.0404687	0	0	0	0	0	0	0	0	0	0	0	0	0	0.064001	0.118332	0.107414	0	0.0418878
Ac_ciRNA_05780	0	0	0	0	0	0	0	0	0	0	0	0	0	0	0	0	0	0	0	0	0	0	0	0	0	0	0.039444	0.0429658	0	0
Ac_ciRNA_05794	0	0	0	0	0	0	0	0	0	0.10631	0.0388462	0	0	0.0632001	0.155099	0.134586	0	0	0	0	0	0	0.0425564	0	0	0	0	0	0	0
Ac_ciRNA_05797	0	0	0	0	0	0	0	0	0	0	0	0	0	0	0.0443141	0.044862	0	0	0	0	0	0	0	0	0	0	0	0	0	0
Ac_ciRNA_05801	0	0	0.571003	0	0	0	0	0.744743	0	0	1.01	0	0.792016	0.400267	1.68393	0	0	0	1.22268	3.29016	1.26641	1.83577	1.1703	2.33048	0	0	0	0	0	0
Ac_ciRNA_05803	0	0	0	0	0	0	0	0	0	0	0	0	0	0	0	0	0	0	0	0	0	0	0	1.3539	0	0	0	0	0.585501	0.397934
Ac_ciRNA_05805	0.357836	0.518636	0	0.159657	0.522672	1.3337	0	0	0	0	0	0	0	0	0	0	0	0	0	0	0	0	0	0	2.45751	1.10935	0	2.01939	0	2.09439
Ac_ciRNA_05808	0	0	0	0	0	0	0	0	0	0	0	0	0	0	0	0	0.0408939	0.0630255	0	0	0	0	0	0	0	0	0	0	0	0
Ac_ciRNA_05832	0	0	0	0	0	0	0	0	0	0	0.0971156	0	0	0	0	0	0.0408939	0	0	0.0616905	0.0429292	0.0403465	0.106391	0	0	0	0	0	0	0
Ac_ciRNA_05837	0	0	0	0	0	0	0	0	0	0	0	0	0	0	0	0	0	0	0	0	0	0	0	0	0	0.0853346	0.059166	0	0.0377743	0.0628316
Ac_ciRNA_05847	0	0	0.0590692	0	0	0	0	0	0	0.0637858	0.0776925	0.101172	0.0428117	0.0632001	0.110785	0	0.102235	0.0630255	0	0.041127	0.0429292	0	0	0	0.0442795	0.0853346	0	0.0429658	0	0
Ac_ciRNA_05848	0	0.0450988	0	0	0	0.0398119	0.0605422	0	0	0.0637858	0	0	0	0	0	0	0	0	0	0	0	0	0	0	0.110699	0.0853346	0	0.107414	0	0.125663
Ac_ciRNA_05849	0	0	0	0	0	0	0	0	0	0	0	0	0.107029	0.0632001	0.0664711	0.179448	0.102235	0.147059	0	0	0	0	0	0	0	0.0426673	0.059166	0.107414	0	0.0418878
Ac_ciRNA_05851	0	0	0	0	0	0	0	0	0	0	0	0	0	0	0	0	0	0	0.455913	0.41127	0.300505	0.403465	0.23406	0.288535	0	0	0	0	0	0
Ac_ciRNA_05856	0.105246	0.135296	0	0.0997853	0	0.159248	0.221988	0.195985	0	0.276405	0.0971156	0	0.51374	0.358134	0.22157	0	0.26581	0.231093	0.0621699	0	0	0.0403465	0.0638346	0.0665851	0.287817	0.341338	0	0	0.339968	0.586429
Ac_ciRNA_05858	0	0	0	0	0	0	0	0	0	0	0	0	0.792016	0.905867	0.664711	1.03183	0.858771	0.672272	0	0	0	0	0	0	0	0	0	0	0	0
Ac_ciRNA_05862	0	0	0	0	0	0	0.0403615	0	0	0.10631	0.0388462	0.0404687	0	0	0	0	0	0	0	0	0	0	0	0	0	0	0	0	0	0
Ac_ciRNA_05865	0	0	0	0	0	0	0	0	0	0	0	0	0.0428117	0.0842667	0.110785	0	0.102235	0.042017	0	0	0	0	0	0	0	0	0	0	0	0
Ac_ciRNA_05866	0	0	0	0	0	0	0	0	0	0	0.854617	0	0	0	0	0	0	0	0.518083	1.11043	0	0.605197	0.617068	0.665851	0	0	0	0	0	0
Ac_ciRNA_05871	0.0841968	0	0	0	0	0.218965	0	0.548758	0	0	0	0	0.342493	0.358134	0.199413	0	0.347598	0	0	0	0.236111	0	0.23406	0	0	0.512008	0	0.193346	0.13221	0
Ac_ciRNA_05873	0	0	0.0393795	0	0	0	0.0403615	0	0	0	0	0	0	0	0	0	0	0	0	0	0	0	0	0	0.221398	0.149336	0	0	0.0755486	0.125663
Ac_ciRNA_05874	0	0.293142	0	0	0	0	0	0	0	0	0	0	1.19873	0.610934	0.620397	0	0	0	0	0	0	0	0	0	0	0	0	0	0	0
Ac_ciRNA_05875	0.357836	0.180395	0	0.259442	0.627206	0	0	0.313576	0.698777	0	0.349616	0	0	0	0.177256	0	0.122682	0.147059	0	0	0	0.242079	0	0	0	0	0	0	0	0
Ac_ciRNA_05893	0	0	0	0.0598712	0	0.0398119	0	0	0	0	0	0	0	0	0	0	0	0	0	0	0	0	0	0	0.088559	0.064001	0	0.0429658	0	0
Ac_ciRNA_05898	0	0	0	0	0	0	0	0	0	0	0	0	0.0642175	0.0421334	0.0664711	0.089724	0	0	0	0	0	0	0	0	0	0	0	0	0	0
Ac_ciRNA_05903	0.0631476	0.157846	0.137828	0	0.0627206	0.0995297	0	0	0	0	0	0	0	0	0	0	0	0	0	0	0	0	0	0	0.464935	0.448007	0.19722	0.171863	0.302194	0.188495
Ac_ciRNA_05904	0.0420984	0.157846	0.078759	0.119742	0.0627206	0.0995297	0.100904	0.215584	0.105875	0.0425238	0.252501	0.242812	0.107029	0.0421334	0.0886281	0.201879	0.224916	0.0630255	0.0621699	0	0.0643938	0.0605197	0.0638346	0	0.287817	0.320005	0.374718	0.279278	0.566614	0.293214
Ac_ciRNA_05905	0	0.0676482	0	0.0399141	0	0.0597178	0	0	0	0	0	0	0	0	0	0	0	0	0	0	0	0	0	0	0.154978	0.0853346	0	0.0644487	0.0377743	0
Ac_ciRNA_05912	0	0	0	0	0	0	0	0.156788	0.359976	0.212619	0	0	0	0	0	0	0	0	0	0	0	0	0	0	0	0	0	0	0	0
Ac_ciRNA_05914	0.0631476	0.0901976	0	0.0598712	0.0418137	0.0995297	0.0605422	0	0	0	0	0	0	0	0	0	0	0	0	0	0	0	0	0	0.177118	0.213337	0.157776	0.236312	0.0944357	0.251327
Ac_ciRNA_05917	0	0	0	0	0	0	0	0	0	0	0	0	0	0	0	0	0	0	0	0	0	0	0	0	0	0	0.0986101	0.0429658	0	0
Ac_ciRNA_05918	0	0	0.0590692	0	0	0.0398119	0.141265	0	0	0	0	0	0	0	0	0	0	0	0	0	0	0	0	0	0.088559	0.149336	0.354996	0.193346	0.226646	0.314158
Ac_ciRNA_05919	0.0631476	0	0	0.0399141	0	0	0	0	0	0	0	0	0.0428117	0	0.0443141	0	0.0613408	0.0630255	0	0	0	0	0	0	0	0	0	0	0	0
Ac_ciRNA_05926	0.105246	0.135296	0.0590692	0.159657	0.0627206	0.139342	0.141265	0.13719	0.190576	0.0850477	0	0.121406	0	0.0421334	0.0886281	0	0.204469	0.042017	0.0414466	0	0	0.0403465	0	0	0.332096	0.768012	0.966379	2.90019	0.698824	3.89556
Ac_ciRNA_05929	0	0	0	0.0598712	0	0.0398119	0.121084	0.0587955	0.0635252	0	0.0388462	0.0404687	0	0	0	0	0.0408939	0	0	0	0	0	0	0	0.088559	0	0.216942	0.257795	0.207759	0.251327
Ac_ciRNA_05941	0	0	0	0	0	0	0	0	0	0	0	0	0.0428117	0	0.0443141	0.044862	0	0.0840339	0	0	0	0	0	0	0	0	0	0	0.0566614	0
Ac_ciRNA_05949	0	0	0	0	0	0	0	0	0	0	0	0	0.0428117	0.0842667	0	0.089724	0	0.105042	0	0.0616905	0.0429292	0	0.0425564	0.0665851	0	0.0426673	0	0	0	0.0418878
Ac_ciRNA_05954	0	0	0	0	0	0	0	0	0	0	0	0	0	0	0	0	0	0	0.0621699	0.041127	0.171717	0	0	0	0	0	0	0	0	0
Ac_ciRNA_05966	0	0	0	0	0	0	0	0	0	0	0.330193	0	0	0	0	0	0	0	0	0	0.364898	1.17005	0.744737	2.37487	0	0	0	0	0	0
Ac_ciRNA_05982	0	0	0	0	0	0	0	0	0	0	0	0	0	0	0	0	0	0	0.207233	0.185072	0.257575	0.403465	0.127669	0.244145	0	0	0	0	0	0
Ac_ciRNA_05985	0	0	0	0	0	0	0	0	0	0	0	0	0.0428117	0.105333	0	0.067293	0.0613408	0	0	0	0	0	0	0	0	0	0	0	0	0
Ac_ciRNA_05992	0	0	0	0	0	0	0	0	0	0	0	0	0	0	0	0	0.0408939	0.042017	0	0	0.107323	0.0605197	0.0851128	0	0	0	0	0	0	0
Ac_ciRNA_05994	0.126295	0.202945	0.078759	0.0997853	0.146348	0.139342	0.141265	0	0	0	0	0	0	0	0	0	0	0	0	0	0	0	0	0	0.265677	0.298671	0.650826	0.472624	0.207759	0.565485
Ac_ciRNA_05998	0	0	0	0	0	0	0.0403615	0.039197	0	0	0	0	0	0	0	0	0	0	0	0	0	0	0	0	0	0	0.039444	0	0	0
Ac_ciRNA_06001	0.0631476	0	0	0	0.125441	0	0	0	0	0	0.233077	0	0	0	0	0	0	0	0	0	0	0.0403465	0.0638346	0.155365	0	0	0	0	0	0
Ac_ciRNA_06002	0	0	0	0	0	0.0398119	0	0	0	0	0.233077	0	0.299682	0	0.0886281	0	0	0.126051	0.0621699	0.205635	0.300505	0.262252	0.191504	0.288535	0	0	0	0.171863	0	0
Ac_ciRNA_06008	0	0	0	0	0	0	0	0	0.0847003	0	0	0	0	0	0	0.044862	0.102235	0.0840339	0	0	0	0	0	0.110975	0	0	0	0	0	0
Ac_ciRNA_06012	0	0	0	0	0	0	0	0	0	0	0.213654	0	0	0	0.0443141	0	0.143129	0.126051	0.18651	0.287889	0	0	0.106391	0.13317	0	0	0	0	0	0
Ac_ciRNA_06017	0	0	0	0	0	0	0	0	0	0	0	0	0.0856233	0	0.0443141	0.044862	0.0613408	0	0	0	0	0	0	0	0	0	0	0	0	0
Ac_ciRNA_06018	0	0	0	0	0	0	0	0	0	0	0.0388462	0	0.0428117	0	0	0.044862	0	0	0.0828932	0.041127	0.0429292	0.080693	0.0425564	0.0665851	0	0	0	0	0	0
Ac_ciRNA_06029	0	0	0	0	0	0	0.0403615	0.0587955	0	0	0	0	0	0	0	0	0	0	0	0	0	0	0	0	0	0	0	0.0859316	0	0
Ac_ciRNA_06037	0	0	0	0	0	0	0	0	0	0	0	0	0.0642175	0.0632001	0	0	0	0	0	0	0	0	0	0	0	0	0	0	0	0
Ac_ciRNA_06040	0	0	0	0	0	0	0	0	0	0	0	0	0.0428117	0.0421334	0.0443141	0	0	0	0	0	0	0	0	0	0	0	0.039444	0	0	0
Ac_ciRNA_06044	0	0	0	0	0	0.0398119	0	0	0	0	0	0	0	0	0	0	0	0	0	0	0	0	0	0	0.132839	0.149336	0	0	0.0377743	0
Ac_ciRNA_06046	0	0	0	0	0	0	0	0	0	0	0	0	0.0428117	0.0421334	0.0664711	0.044862	0	0	0	0	0	0	0	0	0	0	0	0	0	0
Ac_ciRNA_06050	0	0	0	0	0	0	0	0	0	0	0	0.0404687	0.192652	0.105333	0.0443141	0	0.0408939	0	0.0414466	0	0	0	0	0	0	0.0426673	0.118332	0.107414	0	0.0628316
Ac_ciRNA_06052	0	0	0	0	0	0	0	0.176387	0.148225	0	0.0388462	0.14164	0	0	0	0	0	0	0	0	0	0	0	0	0	0	0	0	0	0
Ac_ciRNA_06082	0.0420984	0	0	0	0	0	0	0	0.0423501	0	0	0	0.0428117	0	0	0	0	0.042017	0	0	0	0	0	0	0.110699	0.0853346	0.059166	0.0859316	0	0.146607
Ac_ciRNA_06083	0	0	0	0	0	0	0	0	0.0635252	0	0	0.0404687	0	0	0	0	0.0408939	0.042017	0	0	0.0429292	0	0	0	0	0	0	0	0	0
Ac_ciRNA_06084	0	0	0	0	0	0	0	0	0	0	0	0	0.0642175	0.147467	0.0886281	0	0.0613408	0.0840339	0	0	0	0	0	0	0	0.0426673	0	0.107414	0	0
Ac_ciRNA_06090	0	0	0	0	0	0	0	0	0	0	0	0	0.0642175	0.147467	0.0443141	0.044862	0	0	0	0	0	0	0	0	0	0	0	0	0	0
Ac_ciRNA_06099	0	0	0	0	0	0	0	0.235182	0.169401	0.148833	0	0.0809374	0	0	0	0	0	0	0	0	0	0	0	0	0	0	0	0	0	0
Ac_ciRNA_06102	0	0.676482	0	0.359227	0	0	0	0	0	0	1.12654	0	0	0	0	0	0	0	0.497359	3.63974	0.622474	0.504331	0.914963	1.17634	0.0442795	0.149336	0.19722	0.0859316	0.13221	0
Ac_ciRNA_06109	0	0	0	0	0	0	0	0	0	0	0	0	0	0	0	0	0	0.042017	0	0	0	0	0	0	0	0	0.039444	0.0644487	0	0
Ac_ciRNA_06110	0.0420984	0	0	0	0	0	0	0	0	0	0	0	0	0	0	0	0	0	0	0	0	0	0	0	0.0442795	0.064001	0	0	0	0
Ac_ciRNA_06114	0	0	0	0	0	0	0	0	0	0	0.0388462	0	0	0	0	0	0	0	0.103617	0.0616905	0	0.0605197	0	0	0	0	0	0	0	0
Ac_ciRNA_06115	0	0	0	0	0	0	0	0	0	0	0	0	0	0	0	0	0	0	0	0	0	0	0	0	0	0.064001	0.0788881	0.15038	0.0566614	0.125663
Ac_ciRNA_06119	0	0	0	0	0	0	0	0	0	0	0	0	0.214058	0.1264	0.487455	0.358896	0.306704	0.504204	0	0	0	0	0	0	0	0	0	0	0	0
Ac_ciRNA_06123	0.126295	0.315691	0.0984487	0.119742	0.146348	0.179153	0.080723	0.078394	0.0847003	0	0	0.0809374	0.0428117	0.0632001	0	0	0	0	0	0	0	0	0	0	0.442795	0.938681	0.29583	0.580038	0.358856	0.795867
Ac_ciRNA_06124	0	0	0	0	0	0	0	0	0	0	0.0388462	0	0	0	0	0	0	0	0.0621699	0.041127	0.0643938	0.0403465	0.0425564	0.0887801	0	0	0	0	0	0
Ac_ciRNA_06125	0	0	0	0	0	0	0	0	0	0	0.291347	0	0	0	0	0	0	0	0.24868	0.185072	0.343434	0.383292	0.297895	0.399511	0	0	0	0	0	0
Ac_ciRNA_06126	0.0841968	0.0450988	0	0	0	0	0.0403615	0	0	0	0	0.0607031	0	0	0.177256	0.044862	0	0.042017	0	0	0	0	0	0	0	0	0.039444	0	0	0.0628316
Ac_ciRNA_06132	0	0	0.0393795	0	0	0.0398119	0	0	0	0	0	0	0	0	0	0	0	0	0	0	0	0	0	0	0.0442795	0.064001	0	0.193346	0.113323	0.146607
Ac_ciRNA_06133	0	0	0.0590692	0	0	0	0	0.156788	0.211751	0.10631	0	0	0	0	0	0	0	0	0	0	0	0	0	0	0	0	0.177498	0	0.13221	0
Ac_ciRNA_06134	0	0	0	0	0	0	0	0.39197	0.296451	0.467762	0.0971156	0.424921	0	0	0	0	0	0	0	0	0	0	0	0	0	0	0	0	0	0
Ac_ciRNA_06139	0	0	0	0	0	0	0	0	0	0	0	0	0	0	0	0	0	0	0.0621699	0.041127	0	0	0	0	0	0	0	0	0	0
Ac_ciRNA_06140	0	0	0	0	0	0	0	0	0	0	0	0	0	0	0	0	0	0	0	0	0	0	0	0	0	0	0.157776	0	0.0755486	0.104719
Ac_ciRNA_06143	0	0	0	0	0	0	0	0	0	0	0	0	0	0	0	0	0	0	0	0	0	0	0	0	0	0	0.039444	0.0429658	0	0
Ac_ciRNA_06146	0	0	0	0	0	0	0	0	0	0	0	0	0	0	0	0	0	0	0.0414466	0.102818	0	0.080693	0	0	0	0	0	0	0	0
Ac_ciRNA_06148	0.0631476	0	0	0	0.0418137	0.0597178	0	0	0	0	0	0	0	0	0	0	0	0	0	0	0	0	0	0	0	0.106668	0	0	0	0.0628316
Ac_ciRNA_06150	0	0	0	0	0	0	0	0	0	0	0	0	0.0642175	0	0.0443141	0	0.0408939	0.042017	0	0	0	0	0	0	0	0	0	0	0	0
Ac_ciRNA_06155	0.0420984	0	0	0.0399141	0	0	0.0605422	0	0.0423501	0	0	0	0.107029	0.168533	0.0443141	0	0.0817877	0.0840339	0	0	0	0	0	0	0.110699	0.064001	0.0986101	0.15038	0.0377743	0
Ac_ciRNA_06165	0.0420984	0	0	0.0598712	0	0.0597178	0	0.0587955	0	0	0	0	0	0	0	0	0	0	0	0	0	0	0	0	0.0442795	0.0426673	0	0.0644487	0	0
Ac_ciRNA_06167	0.0631476	0.0676482	0.0393795	0	0	0.0796238	0	0	0.0847003	0.10631	0	0.0404687	0	0	0	0	0	0	0	0	0	0	0	0	0.088559	0	0.157776	0	0.0566614	0
Ac_ciRNA_06175	0	0	0	0	0	0	0	0.195985	0.12705	0.170095	0	0.303515	0	0	0	0	0	0	0	0	0	0	0	0	0	0	0	0	0	0
Ac_ciRNA_06179	0	0	0	0	0	0	0	0.195985	0.148225	0.148833	0.0388462	0.202344	0	0	0.155099	0	0	0	0	0	0	0	0	0	0	0	0	0	0	0
Ac_ciRNA_06183	0	0	0	0	0	0	0	0.176387	0.381151	0.340191	0.0582694	0	0	0.0421334	0	0	0	0	0	0	0	0	0	0	0	0	0	0	0	0
Ac_ciRNA_06184	0	0	0	0	0	0	0	0.039197	0.148225	0.191357	0	0	0	0.0421334	0	0	0	0	0	0	0	0	0	0	0	0	0	0	0	0
Ac_ciRNA_06187	0	0	0	0	0	0	0	0	0	0	0	0	0.0642175	0.231734	0.110785	0.134586	0	0	0	0	0	0	0	0	0	0	0	0	0	0
Ac_ciRNA_06192	0	0	0	0	0	0	0	0.0587955	0.190576	0.10631	0	0.0607031	0	0	0	0	0	0	0	0	0	0	0	0	0	0	0	0	0	0
Ac_ciRNA_06199	0	0	0	0	0	0	0	0	0	0	0	0	0	0.105333	0.199413	0.067293	0	0.105042	0	0	0	0	0	0	0	0	0	0	0	0
Ac_ciRNA_06202	0	0	0	0	0	0	0	0	0	0	0	0	0.0642175	0.0632001	0	0.044862	0.0817877	0.0840339	0	0	0	0	0	0	0	0	0.039444	0	0.0377743	0
Ac_ciRNA_06205	0	0	0	0	0	0	0.0403615	0	0	0	0	0	0	0	0	0	0	0	0	0	0	0	0	0	0.0442795	0.064001	0	0.0859316	0	0.0628316
Ac_ciRNA_06212	0	0	0	0	0	0	0	0	0	0	0	0	0.0642175	0.0632001	0.0664711	0.089724	0	0	0	0	0	0	0	0	0	0	0	0	0	0
Ac_ciRNA_06220	0	0	0	0	0	0	0	0	0	0	0	0	0.107029	0.1264	0.0886281	0	0	0	0	0	0	0	0	0	0	0	0	0	0	0
Ac_ciRNA_06222	0	0	0	0	0	0	0	0	0	0	0	0	0	0	0	0	0.0613408	0.0840339	0	0	0	0	0	0	0	0	0	0	0	0
Ac_ciRNA_06226	0	0	0	0	0	0	0	0	0	0	0	0	0.107029	0.0421334	0.0443141	0.067293	0.0408939	0	0	0	0	0	0	0	0	0	0	0	0	0
Ac_ciRNA_06233	0	0	0	0	0	0	0	0	0.0635252	0.0425238	0	0	0	0	0	0	0	0	0	0	0	0	0	0	0	0	0	0	0	0
Ac_ciRNA_06234	0	0	0	0	0	0	0	0	0.0847003	0.0850477	0	0.0607031	0	0	0	0	0	0	0	0	0	0	0	0	0	0	0	0	0	0
Ac_ciRNA_06238	0	0	0	0	0	0	0	0	0	0	0	0	0	0.0421334	0	0	0	0	0	0	0	0	0	0	0	0	0.0788881	0.128897	0	0.146607
Ac_ciRNA_06243	0	0	0.0590692	0.0399141	0	0	0.0403615	0	0	0	0	0.0404687	0.0428117	0.0842667	0	0.089724	0	0	0	0	0	0	0	0	0	0.0426673	0	0	0	0
Ac_ciRNA_06251	0	0	0	0	0	0	0	0	0	0	0.0582694	0	0	0	0	0	0	0	0.0828932	0.0822541	0.0429292	0.0605197	0.0638346	0	0	0	0	0	0	0
Ac_ciRNA_06260	0	0	0	0	0	0	0	0	0	0	0	0	0	0	0.0664711	0.246741	0.0613408	0.0630255	0	0	0	0	0	0	0	0	0	0	0	0
Ac_ciRNA_06263	0	0.315691	0	0.0997853	0	0.218965	0.221988	0	0.0847003	0.10631	0	0.0404687	0.107029	0.0842667	0.177256	0.134586	0.0613408	0.0840339	0	0	0	0	0	0	0.332096	0.320005	1.08471	0.902282	0.472178	0.335102
Ac_ciRNA_06267	0	0	0	0	0	0	0	0	0	0	0.0388462	0	0	0	0	0	0	0	0	0.0616905	0.0643938	0.0403465	0	0	0	0	0	0	0	0
Ac_ciRNA_06268	0	0	0	0	0	0	0	0	0	0	0	0	0.0856233	0	0	0.067293	0.0613408	0	0	0	0	0	0	0	0	0	0.059166	0.0644487	0	0.0418878
Ac_ciRNA_06269	0	0	0	0	0.0836275	0	0	0	0	0	0	0.0404687	0	0	0	0	0.0613408	0	0	0	0	0	0	0.0887801	0.088559	0.149336	0.118332	0.128897	0.0377743	0.125663
Ac_ciRNA_06271	0	0	0	0	0	0	0	0	0	0	0	0	0	0	0	0	0	0	0	0	0	0	0	0	0.0442795	0	0.039444	0.107414	0	0
Ac_ciRNA_06275	0	0	0	0	0	0	0	0	0	0	0	0	0.0642175	0.0421334	0	0	0	0.042017	0	0	0	0	0	0	0	0	0	0	0	0
Ac_ciRNA_06278	0	0.0450988	0.196897	0.139699	0	0.238871	0	0.13719	0.381151	0	0	0.0809374	0	0	0	0	0	0	0	0	0	0	0	0	0.442795	0.128002	0.354996	0.494107	0.207759	0.188495
Ac_ciRNA_06289	0	0	0	0	0	0	0	0	0	0	0	0	0	0	0	0	0	0	0	0	0	0	0	0	0	0	0.138054	0.0429658	0	0
Ac_ciRNA_06293	0.0420984	0	0	0	0	0	0	0	0	0	0	0	0	0	0	0	0.0408939	0.0840339	0	0	0	0	0	0	0	0	0	0.0429658	0	0
Ac_ciRNA_06298	0	0	0	0	0	0	0	0	0	0	0.0582694	0	0	0	0	0	0	0	0.0621699	0.0822541	0.0429292	0	0.0425564	0.110975	0	0	0	0	0	0
Ac_ciRNA_06305	0	0	0	0	0	0	0	0.0979925	0.0847003	0.0425238	0	0	0	0	0	0	0	0	0	0	0	0	0	0	0	0	0	0	0	0
Ac_ciRNA_06306	0	0	0	0	0	0	0	0.078394	0.0423501	0.0425238	0	0.0607031	0	0	0	0	0	0	0	0	0	0	0	0	0	0	0	0	0	0
Ac_ciRNA_06307	0	0	0	0	0	0	0	3.33175	3.98091	2.46638	0.582694	3.64218	0	0	0	0	0	0	0	0	0	0	0	0	0	0	0	0	0	0
Ac_ciRNA_06318	0.420984	0.428438	0	0.199571	0.146348	0.179153	0.443976	0	0	0	0	0	0	0	0	0	0	0	0	0	0	0	0	0	0.597773	0.682677	0	1.80456	0	2.86931
Ac_ciRNA_06321	0	0	0	0	0	0	0	0.195985	0.232926	0.10631	0.0582694	0.364218	0.235464	0.294934	0.265884	0.44862	0.368045	0.336136	0	0	0	0	0	0	0	0	0	0	0	0
Ac_ciRNA_06332	0	0	0	0	0.0418137	0	0	0	0	0	0	0	0	0	0	0	0	0	0	0.041127	0	0	0	0	0.221398	0.0853346	0	0	0	0
Ac_ciRNA_06338	0.0631476	0	0.0590692	0.0598712	0	0.0597178	0	0	0	0	0	0	0	0	0	0	0	0	0	0	0	0	0	0	0.154978	0.277337	0.157776	0.107414	0.151097	0.188495
Ac_ciRNA_06339	0.0631476	0	0	0	0	0.0597178	0.100904	0	0	0	0	0	0	0	0	0	0	0	0	0	0	0	0	0	0.110699	0.128002	0.177498	0.0859316	0.0566614	0.167551
Ac_ciRNA_06345	0	0	0	0	0	0	0	0	0	0	0	0	0.0642175	0.0421334	0.0443141	0	0.0613408	0	0	0	0	0	0	0	0	0	0	0	0	0
Ac_ciRNA_06347	0	0	0	0	0	0	0	0	0	0	0	0	0	0.0421334	0	0	0.0408939	0.042017	0	0	0	0	0	0	0	0	0	0	0	0
Ac_ciRNA_06349	0	0	0	0	0	0	0	0	0	0	0	0	0.620769	0.484534	0.487455	0	0.408939	0.231093	0	0	0	0	0	0	0	0	0	0	0	0
Ac_ciRNA_06356	0	0	0	0	0	0	0	0.254781	0.550552	0.595334	0.330193	0.121406	0.577957	0.400267	0.487455	0.246741	0.470279	0.336136	0.393743	0.452397	0.472221	0.504331	0.59579	0.355121	0	0	0	0	0	0
Ac_ciRNA_06357	0	0	0	0	0	0	0	0	0	0	0	0	0.620769	0.610934	0.731182	0.89724	0.695196	0.588238	0	0.102818	0.128788	0	0	0.0443901	0	0	0	0	0	0
Ac_ciRNA_06359	0	0.180395	0	0	0	0	0.161446	0	0	0	0	0.121406	0	0	0	0	0	0	0	0	0	0	0	0	0.642053	0.576009	0.276108	0	0	0.670204
Ac_ciRNA_06361	0	0	0	0	0	0	0	0.293978	0.105875	0.191357	0	0.0809374	0	0	0	0	0	0	0	0	0	0	0	0	0	0	0	0	0	0
Ac_ciRNA_06365	0	0.0450988	0	0	0.0627206	0.0796238	0.100904	0.039197	0	0	0.0582694	0.0607031	0.107029	0.0632001	0.0664711	0.134586	0.0408939	0	0	0.041127	0.0858584	0.0403465	0	0.0443901	0.0442795	0	0.039444	0	0.0377743	0
Ac_ciRNA_06366	0	0.0676482	0	0.119742	0	0.199059	0	0	0	0	0	0	0	0	0	0	0	0	0	0	0	0	0	0	0.376376	0.149336	0	0.15038	0	0.167551
Ac_ciRNA_06367	0	0	0.0590692	0.0997853	0	0	0.080723	0	0	0.0425238	0.0582694	0.0404687	0.107029	0.0842667	0.177256	0.246741	0.163575	0.126051	0	0	0	0	0	0	0.0442795	0	0	0	0	0
Ac_ciRNA_06376	0	0	0	0	0.167255	0.298589	0	0	0	0	0	0	0	0	0	0	0	0	0	0	0	0	0	0	0.154978	0	0	0	0	0
Ac_ciRNA_06390	0	0	0	0	0	0	0	0	0	0	0	0	0	0	0	0	0	0	0	0	0	0	0	0	0	0	0.118332	0.0429658	0.0566614	0
Ac_ciRNA_06400	0.0631476	0.157846	0	0	0.0627206	0.159248	0.363253	0	0	0	0	0	0	0	0	0	0	0	0	0	0	0	0	0	0.309957	0.213337	0.374718	0.171863	0.13221	0.104719
Ac_ciRNA_06409	0	0	0	0	0	0	0	0.0979925	0	0	0	0.0404687	0	0	0	0	0	0	0	0	0	0	0	0	0	0	0.276108	0.0429658	0	0
Ac_ciRNA_06412	0	0.112747	0.0590692	0	0	0	0	0	0	0	0	0	0	0	0	0	0	0	0	0	0	0	0	0	0.265677	0.384006	0	0.408175	0.472178	0.27227
Ac_ciRNA_06430	0	0	0	0	0	0	0	0	0	0	0	0	0.107029	0.0421334	0.132942	0	0.102235	0.0630255	0	0	0	0	0	0	0	0	0	0	0	0
Ac_ciRNA_06434	0.0420984	0	0	0	0	0	0.141265	0.078394	0	0	0	0	0	0	0	0	0	0	0	0	0	0	0	0	0.110699	0.192003	0.0986101	0.128897	0	0.0837755
Ac_ciRNA_06443	0	0	0	0	0	0	0.26235	0	0	0	0	0.0404687	0	0	0	0	0	0	0	0	0	0	0	0	0.0664193	0	0	0	0.113323	0.356046
Ac_ciRNA_06447	0	0	0	0	0.125441	0	0	0	0	0	0	0	0.363899	0.463467	0.177256	0	0	0.315127	0	0	0	0	0	0	0	0	0	0	0	0
Ac_ciRNA_06448	0	0	0	0	0	0	0.080723	0.0979925	0	0.170095	0.466155	0.263047	0.706392	0.737334	0.620397	1.05426	0.674749	0.735297	0	0	0.150252	0.544678	0.212782	0.799021	0	0	0	0	0	0
Ac_ciRNA_06451	0	0	0	0	0	0	0	0	0.0635252	0	0.0582694	0.0809374	0	0	0	0	0	0	0	0	0	0	0	0	0	0	0	0	0	0
Ac_ciRNA_06458	0	0	0	0	0	0.159248	0	0	0	0	0	0	2.24761	0	0.420983	0.628068	2.33095	2.7311	0	0	0	0	0	0	0.0442795	0.23467	0	0	0	0
Ac_ciRNA_06461	0	0	0	0	0	0	0	0	0	0	0	0	0	0	0	0	0	0	0	0	0.0429292	0	0.23406	0.510486	0	0	0	0	0	0
Ac_ciRNA_06466	0	0	0	0	0	0	0	0	0	0	0	0	0	0	0	0	0	0	0	0	0	0	0	0	0	0	0.039444	0.0429658	0	0
Ac_ciRNA_06467	0.0631476	0	0.0393795	0.0598712	0	0.0398119	0	0	0	0	0	0	0	0	0	0	0	0	0	0	0	0	0	0	0.0664193	0.128002	0.0788881	0.0644487	0	0.0837755
Ac_ciRNA_06470	0	0	0	0	0	0	0	0	0	0	0.135962	0	0	0	0	0	0	0	0	0.0822541	0.0858584	0.0605197	0.191504	0.0665851	0	0	0	0	0	0
Ac_ciRNA_06476	0.25259	0.270593	0.334726	0.0798283	0.209069	0.298589	0	0.431167	0	0	0	0.0607031	0	0	0	0	0	0	0	0	0	0	0	0	0.309957	0	0	0.451141	0	0
Ac_ciRNA_06480	0	0	0	0	0	0	0	0	0	0	0.0582694	0	0	0	0	0	0	0	0.0828932	0.0822541	0.107323	0.100866	0	0	0	0	0	0	0	0
Ac_ciRNA_06481	0	0	0	0	0	0	0.0605422	0.0587955	0	0	0	0	0.0428117	0	0.0443141	0	0	0	0	0	0	0	0	0	0	0	0	0	0	0
Ac_ciRNA_06487	0	0	0	0	0	0.0398119	0	0	0	0	0	0	0	0	0	0	0	0	0	0	0	0	0	0	0	0	0.0788881	0.0429658	0	0
Ac_ciRNA_06496	0	0	0	0	0	0	0	0	0	0	0	0	0.0428117	0.0421334	0.0443141	0.089724	0.0613408	0.0630255	0	0	0	0	0	0	0	0	0	0	0	0
Ac_ciRNA_06502	0.0420984	0.0450988	0	0	0	0	0	0	0	0	0	0	0	0	0	0	0	0	0	0	0	0	0	0	0	0	0.059166	0	0.0377743	0.0628316
Ac_ciRNA_06505	0.0420984	0	0	0.0598712	0	0	0	0.039197	0.0423501	0.0637858	0.0776925	0	0.214058	0.0632001	0.110785	0.044862	0.102235	0.0630255	0	0	0	0	0	0	0.0664193	0.0426673	0	0.0429658	0	0
Ac_ciRNA_06508	0	0	0	0	0	0.0398119	0	0	0	0	0	0	0.214058	0.0842667	0.0886281	0.067293	0.102235	0.210085	0	0	0	0	0	0	0	0	0	0	0	0
Ac_ciRNA_06511	0	0.0450988	0	0	0	0	0	0	0	0	0	0	0	0	0	0	0	0	0	0	0	0	0	0	0.0664193	0.0426673	0.0788881	0	0	0.0418878
Ac_ciRNA_06516	0	0	0	0	0	0	0.0605422	0	0	0	0	0	0.149841	0.1264	0.110785	0.089724	0.0817877	0.042017	0	0	0	0	0	0	0	0	0.0788881	0.0859316	0	0.0418878
Ac_ciRNA_06517	0	0	0	0.0399141	0.0418137	0	0	0	0.0635252	0.0425238	0	0	0.363899	0.3792	0.443141	0.314034	0.347598	0.294119	0	0	0	0	0	0	0.0442795	0.064001	0.157776	0.236312	0.0377743	0.0837755
Ac_ciRNA_06519	0	0	0	0	0	0	0	0	0	0	0	0	0.0428117	0	0.0664711	0.044862	0	0.0630255	0	0	0	0	0	0	0	0	0	0	0	0
Ac_ciRNA_06526	0.0420984	0.0450988	0	0.0399141	0.0627206	0.0597178	0.0605422	0.0979925	0.0635252	0.0850477	0	0.121406	0.0428117	0	0	0	0	0	0	0	0	0	0	0	0.0664193	0.064001	0.059166	0.0644487	0	0.146607
Ac_ciRNA_06527	0	0	0.078759	0	0	0.0796238	0.100904	0	0	0	0	0	0.0428117	0	0	0.044862	0	0	0.0414466	0	0	0	0	0	0.088559	0.064001	0.157776	0	0.0377743	0
Ac_ciRNA_06528	0	0	0	0	0.0418137	0	0	0	0	0.0425238	0.0388462	0	0	0	0	0	0	0	0	0.041127	0	0	0	0	0.0442795	0.0426673	0	0.0859316	0	0
Ac_ciRNA_06545	0	0	0	0	0	0	0	0	0	0	0	0	0	0	0	0.044862	0	0	0	0	0	0	0	0	0.0664193	0.0426673	0.039444	0	0	0
Ac_ciRNA_06553	0	0	0	0	0	0	0	0	0	0	0	0	0	0	0	0	0	0	0	0	0	0	0	0	0.0442795	0.0426673	0	0	0	0
Ac_ciRNA_06559	0	0	0	0	0	0	0	0	0	0	0	0	0	0	0	0	0	0	0	0	0	0	0	0	0.0442795	0	0.039444	0.0859316	0	0
Ac_ciRNA_06565	0	0	0	0	0	0	0	0	0	0	0	0	0	0	0	0	0.0408939	0.042017	0	0	0	0	0	0	0	0	0	0	0	0
Ac_ciRNA_06569	0.0420984	0.0676482	0	0	0	0.139342	0	0	0	0	0	0	0	0	0	0	0	0	0	0	0	0	0	0	0.132839	0.0853346	0	0.0644487	0	0
Ac_ciRNA_06574	0	0	0	0.239485	0.125441	0.139342	0	0	0.423501	0	0	0	0.0856233	0	0	0.089724	0	0	0	2.50875	0.321969	0.282425	0.340451	0.22195	0	0.810679	0.473328	0	0	0
Ac_ciRNA_06576	0	0	0	0	0	0	0	0	0	0	0	0	0	0	0	0	0	0	0	0.205635	0	0.100866	0.106391	0.22195	0	0	0	0	0	0
Ac_ciRNA_06582	0	0	0	0	0	0	0	0	0	0	0	0	0.428117	0	0.354512	0.986965	1.20637	0	0	0	0	0	0	0	0	0	0	0	0	0
Ac_ciRNA_06585	0	0	0	0	0	0	0.0403615	0	0	0.0637858	0.0776925	0.0404687	0	0	0	0	0	0	0	0.041127	0.0429292	0	0.106391	0.0443901	0	0	0.0788881	0	0	0
Ac_ciRNA_06586	0	0	0.0393795	0	0	0	0.0403615	0.176387	0.0635252	0.0637858	0	0.0809374	0	0	0	0	0	0	0	0	0	0	0	0	0	0	0	0	0	0
Ac_ciRNA_06591	0.0420984	0.135296	0.078759	0.0997853	0.104534	0.0597178	0.100904	0.215584	0.0847003	0.10631	0	0.0404687	0	0	0	0	0	0	0	0	0	0	0	0	0.332096	0.23467	0.611382	0.66597	0.491066	0.586429
Ac_ciRNA_06592	0	0	0	0	0	0.0398119	0.181627	0	0.0635252	0.0425238	0	0	0	0	0	0.067293	0.0408939	0.042017	0	0	0	0	0	0	0	0	0	0	0	0
Ac_ciRNA_06595	0	0	0	0	0	0	0	0	0	0	1.94231	0	0.0428117	0	0	0	0.102235	0.042017	0.476636	1.76846	1.37374	2.70321	2.53211	4.83852	0	0	0	0	0	0
Ac_ciRNA_06597	0.0631476	0.0901976	0.078759	0.0798283	0.0627206	0.258777	0.121084	0.039197	0	0.0850477	0	0	0.0856233	0.0632001	0	0.112155	0	0.168068	0.103617	0	0	0.100866	0	0.0665851	0	0	0	0	0.0566614	0
Ac_ciRNA_06600	0	0	0	0	0	0	0	0	0	0	0	0	0	0	0	0	0.0408939	0.147059	0	0	0	0	0	0	0	0	0	0	0	0
Ac_ciRNA_06601	0	0	0	0	0	0	0	0	0	0	0	0	0.214058	0	0.132942	0.381327	0.408939	0.0840339	0	0	0	0	0	0	0	0.064001	0	0.171863	0	0
Ac_ciRNA_06604	0	0	0	0	0	0	0	0.0587955	0.105875	0	0	0.0404687	0.107029	0	0.155099	0.067293	0.204469	0.126051	0	0	0	0	0	0	0.0664193	0.0426673	0	0.0644487	0	0
Ac_ciRNA_06615	0	0	0	0	0	0	0	0	0	0	0	0	0	0	0	0	0	0	0	0	0	0	0	0	0.0442795	0.0426673	0.0788881	0	0	0.0418878
Ac_ciRNA_06625	0	0	0	0	0	0	0	0	0	0	0	0	0	0	0	0	0	0	0.0414466	0.041127	0.0429292	0	0	0	0	0	0	0	0	0
Ac_ciRNA_06627	0	0	0	0	0	0	0	0	0	0	0	0	0.0428117	0	0.0443141	0.044862	0	0	0	0	0	0	0	0	0	0	0	0	0	0
Ac_ciRNA_06631	0	0	0	0	0	0	0	0	0.232926	0.10631	0	0	0	0	0	0	0	0	0	0	0	0	0	0	0	0	0	0	0	0
Ac_ciRNA_06635	0	0	0	0	0	0	0	0	0	0	0	0	0	0	0	0	0	0	0	0	0	0	0	0	0	0.0853346	0	0.15038	0.0755486	0.230383
Ac_ciRNA_06636	0	0	0	0	0	0	0	0	0	0	0	0	0	0	0	0	0	0	0	0	0	0	0	0	0.0442795	0.0426673	0	0	0	0
Ac_ciRNA_06639	0	0	0	0	0	0	0	0	0	0	0	0	0	0	0	0	0	0	0	0.041127	0.128788	0.0605197	0	0	0	0	0	0	0	0
Ac_ciRNA_06640	0	0	0	0	0.0209069	0	0	0.039197	0	0.0425238	0	0.0404687	0.0214058	0	0	0.044862	0.0408939	0.0210085	0	0	0	0	0	0	0	0	0	0	0	0
Ac_ciRNA_06642	0	0	0	0	0.125441	0	0	0	0	0	0.0388462	0.14164	0	0	0	0	0	0	0	0	0	0	0	0	0	0	0	0	0	0
Ac_ciRNA_06643	0.105246	0	0	0	0	0	0.121084	0	0	0	0	0	0	0	0	0	0	0	0	0	0	0	0	0	0.088559	0.149336	0.138054	0.0859316	0.0944357	0
Ac_ciRNA_06644	0	0	0	0	0.0627206	0.0398119	0	0	0	0	0	0	0	0	0	0	0	0	0	0	0	0	0	0	0	0	0	0	0	0
Ac_ciRNA_06652	0	0	0	0	0	0	0	0	0	0	0	0	0	0	0	0	0	0	0.227956	0.41127	0.214646	0.262252	0.255338	0.31073	0	0	0	0	0	0
Ac_ciRNA_06659	0	0	0	0	0	0	0	0	0	0	0.155385	0	0	0	0.731182	0	0.756537	0.756305	0	0	0	0	0	0	0	0	0	0	0	0
Ac_ciRNA_06663	0	0.0450988	0	0	0	0	0	0.078394	0.0423501	0.0637858	0	0.0404687	0	0	0	0	0	0	0	0	0	0	0	0	0	0	0.059166	0.15038	0	0
Ac_ciRNA_06665	0	0	0.137828	0	0	0	0	0	0	0	0	0	0	0	0	0	0	0	0.165786	0.431834	0.386363	0.282425	0.383008	0.421706	0	0	0	0	0	0
Ac_ciRNA_06667	0	0	0	0	0	0	0	0	0	0	0.252501	0.283281	0	0	0	0	0	0	0.207233	0	0	0	0	0	0	0	0	0	0	0
Ac_ciRNA_06670	0	0.180395	0	0	0	0	0	0.470364	0.698777	0.467762	0.407886	0.566562	0.299682	0.421334	0.177256	0.269172	0.26581	0.231093	0	0	0	0	0	0.488291	0	0	0	0.300761	0	0.188495
Ac_ciRNA_06678	0	0	0	0	0	0	0	0	0	0	0	0	0	0	0	0	0	0	0	0	0	0	0	0	0	0	0.039444	0.107414	0	0
Ac_ciRNA_06680	0	0	0	0	0	0	0	0	0	0	0	0	0	0	0	0	0	0	0	0	0	0	0	0	0.0442795	0	0	0	0.0566614	0.0418878
Ac_ciRNA_06706	0	0	0	0	0	0	0	0	0	0	0	0	0	0	0	0	0	0	0.0828932	0	0	0	0.0638346	0.0887801	0	0	0	0	0	0
Ac_ciRNA_06707	0	0	0	0	0	0.0398119	0	0	0	0	0	0	0	0	0	0	0	0	0	0	0	0	0	0	0.110699	0.106668	0	0.0429658	0	0
Ac_ciRNA_06710	0	0	0	0	0.0418137	0	0.0605422	0	0	0	0	0	0	0	0	0	0	0	0	0	0	0	0	0	0.110699	0.106668	0.0986101	0.0429658	0.0377743	0.167551
Ac_ciRNA_06720	0	0	0	0	0	0	0	0	0	0	0	0	0.470928	0.358134	0.243727	0.560775	0	0	0	0	0	0	0	0	0	0	0	0	0	0
Ac_ciRNA_06723	0	0	0	0	0	0	0	0.313576	0	0	0	0	0	1.74853	0	0	0	0	0	0.616905	0	0	1.19158	1.95316	0	0	0	0	0	0
Ac_ciRNA_06726	0	0	0.0984487	0	0	0	0	0	0	0	0	0	0.920451	0.526667	0.465298	0.785085	1.02235	0.357144	0.352296	0.493524	0.364898	0.766583	0	0	0	0	0	0	0	0
Ac_ciRNA_06739	0	0	0	0	0	0	0	0	0	0	0	0	0	0	0	0	0	0	0.145063	0.0822541	0	0.080693	0.0638346	0.0443901	0	0	0	0	0	0
Ac_ciRNA_06743	0	0	0	0.0399141	0	0.0398119	0	0	0	0	0	0.0607031	0	0	0	0	0	0	0.0414466	0.041127	0	0	0	0	0	0	0.059166	0	0	0
Ac_ciRNA_06751	0	0	0	0	0	0	0	0	0	0	0	0	0	0	0.0443141	0	0.102235	0.105042	0	0	0	0	0	0	0	0	0	0	0	0
Ac_ciRNA_06760	0	0	0	0	0	0.258777	0.161446	0	0.190576	0	0	0.0202344	0	0	0.155099	0.022431	0	0	0	0	0	0	0	0	0.154978	0	0	0	0.188871	0
Ac_ciRNA_06761	0	0.0901976	0.078759	0	0	0	0	0	0.105875	0	0	0.0404687	0	0	0	0	0	0	0	0	0	0	0	0	0.354236	0.0853346	0	0.214829	0.0566614	0
Ac_ciRNA_06762	0	0	0	0	0	0	0	0	0	0	0	0	0	0	0	0	0	0	0	0	0	0	0	0	0	0	0.0986101	0.0429658	0.0566614	0.209439
Ac_ciRNA_06763	0	0	0	0	0	0.0398119	0	0	0.0635252	0.0850477	0	0.101172	0	0	0	0	0.0408939	0.042017	0	0	0	0	0	0	0	0	0	0	0	0
Ac_ciRNA_06767	0	0.0901976	0	0	0	0.139342	0	0	0	0	0.0388462	0	0	0	0	0	0	0	0	0	0	0	0	0	0	0	0	0	0.0755486	0.0837755
Ac_ciRNA_06773	0	0	0	0	0	0	0	0	0	0	0	0	0	0	0	0	0.0408939	0.042017	0	0	0	0	0	0	0	0	0	0	0	0
Ac_ciRNA_06779	0	0	0	0	0	0	0.0403615	0	0	0	0	0	0	0	0	0	0	0	0	0	0	0	0	0	0	0	0	0.107414	0.0566614	0.0628316
Ac_ciRNA_06784	0	0.0450988	0	0	0	0	0	0	0	0	0	0	0	0	0	0	0	0	0	0	0	0	0	0	0.0664193	0.064001	0.039444	0	0	0.0837755
Ac_ciRNA_06794	0	0	0	0	0	0.0995297	0	0	0	0	0	0	0	0	0	0	0	0	0	0	0	0	0	0	0.0442795	0	0	0	0.0377743	0.0628316
Ac_ciRNA_06796	0	0	0	0	0	0	0	0	0	0	0	0	0	0	0	0	0	0	0	0	0.0429292	0.0403465	0	0	0	0	0	0	0	0
Ac_ciRNA_06798	0	0	0	0	0	0	0	0	0	0	0	0	0.192652	0.0632001	0.0443141	0	0	0	0	0	0	0	0	0	0	0	0	0	0	0
Ac_ciRNA_06799	0	0	0	0	0	0	0	0	0	0	0	0	0	0	0	0	0	0	0.455913	0.555215	0.515151	1.1297	1.89376	2.08633	0	0	0	0	0	0
Ac_ciRNA_06802	0	0	0	0	0	0	0	0	0	0	4.79751	0	0	0	0	0	0	0	0	0.699159	0	0	1.8512	0.887801	0	0	0	0	0	0
Ac_ciRNA_06803	0	0	0	0	0	0	0	0	0	0.191357	1.3402	0.667734	0	0	0	0	0	0	0.207233	0.123381	0.193181	0.363118	1.08519	1.08756	0	0	0	0	0	0
Ac_ciRNA_06806	2.6943	0	0	4.01137	0	0	14.1063	11.9747	9.7617	6.20848	7.69156	0	6.6144	4.9928	3.54512	6.41527	5.37754	1.38656	0.725316	1.08987	1.0947	1.83577	3.36196	3.32926	0	0	0	0	0	0
Ac_ciRNA_06808	0	0	0	0	0	0	0	16.5019	12.6203	10.3333	0	0	0	0	0	0	0	0	0	0	0	0	0	0	0	0	0	0	0	0
Ac_ciRNA_06813	0	0	0	0	0	0	0	0	0	0	0	0	0.0428117	0.0632001	0.0443141	0	0.0613408	0	0	0	0	0	0	0	0	0	0	0	0	0
Ac_ciRNA_06818	0	0	0	0	0	0	0	0	0	0	0	0	0.149841	0	0.0443141	0.089724	0.102235	0.042017	0	0	0	0	0	0	0	0	0	0	0	0
Ac_ciRNA_06828	0	0	0	0	0	0	0	0	0	0	0	0	0	0	0	0	0	0	0	0	0	0	0	0	0	0	0.118332	0.0644487	0	0.0418878
Ac_ciRNA_06829	0	0	0	0	0	0	0	0	0	0	0	0	0	0.0632001	0	0	0.0613408	0.042017	0	0	0	0	0	0	0	0	0	0	0	0
Ac_ciRNA_06832	0.336787	0.834328	0	0.0997853	0.376324	0.179153	0.464157	0	0	0	0	0.0607031	0.0642175	0	0.531769	0.403758	0.102235	0.546221	0	0	0	0	0	0	0	2.58137	0	0.343726	0	0.586429
Ac_ciRNA_06834	0	0	0	0	0	0	0	0	0	0	0	0.0404687	0	0	0	0	0	0	0	0	0	0	0	0	0	0.0426673	0.138054	0.0644487	0.0755486	0.0418878
Ac_ciRNA_06840	0	0	0	0	0	0	0	0	0	0	0	0	0	0	0	0	0	0	0	0	0	0	0	0	0	0	0	0.128897	0.0944357	0.0628316
Ac_ciRNA_06842	0	0	0.0393795	0	0	0.0597178	0	0	0	0	0	0	0	0	0	0	0	0	0	0	0	0	0	0	0.243537	0.149336	0.0986101	0.0859316	0.113323	0
Ac_ciRNA_06853	0	0	0	0	0	0	0	0	0	0	0	0	0	0	0	0	0	0	0	0	0	0	0	0	0.088559	0.0853346	0.118332	0	0.0755486	0
Ac_ciRNA_06854	0	0	0	0	0	0	0	0	0	0	0	0	0	0	0	0	0	0	0	0	0	0	0	0	0	0	0.039444	0.0429658	0.151097	0.0837755
Ac_ciRNA_06857	0	0	0	0	0	0	0	0	0.211751	0.0850477	0.0582694	0	0	0	0	0	0	0	0	0	0	0	0.106391	0.0443901	0	0	0	0	0.207759	0
Ac_ciRNA_06869	0	0	0	0	0	0	0.0605422	0.039197	0	0	0	0	0	0	0	0	0	0	0	0	0	0	0	0	0	0	0	0	0	0
Ac_ciRNA_06873	0	0.0450988	0.0590692	0	0	0.119436	0	0.0587955	0.0635252	0	0.0388462	0.0809374	0	0	0	0	0	0	0	0	0	0	0	0	0.221398	0.0853346	0.118332	0.15038	0.207759	0
Ac_ciRNA_06875	0	0	0	0	0	0	0	0	0	0	0	0	0	0	0	0	0	0	0	0	0	0	0	0	0.177118	0.0853346	0	0	0.0377743	0.0418878
Ac_ciRNA_06886	0.147344	0.315691	0	0	0.104534	0.0398119	0.0403615	0	0.0635252	0	0	0.0404687	0	0	0	0	0	0	0	0	0	0	0	0	0	0	0	0	0.0755486	0.146607
Ac_ciRNA_06891	0.27364	0.38334	0.295346	0.379184	0.209069	0.477743	0	0	0	0	0	0	0	0	0	0	0	0	0	0	0	0	0	0	0.686332	0.576009	0.453606	0.386692	0.491066	0.37699
Ac_ciRNA_06896	0	0	0	0	0	0	0	0	0	0	0	0	0	0	0	0	0	0	0.12434	0.164508	0	0	0.148947	0	0	0	0	0	0	0
Ac_ciRNA_06897	0	0	0	0.498927	0.376324	0	0	0	0	0	2.38904	2.30672	1.77668	0	1.06354	1.99636	1.71754	0	0	0	0	0	0	0	0	0	0	0	0	0
Ac_ciRNA_06900	0	0	0	0	0	0	0	0	0.0423501	0.0425238	0	0.0607031	0	0	0	0	0	0	0	0	0	0	0	0	0	0	0	0	0	0
Ac_ciRNA_06906	0	0	0	0	0.188162	0.378213	0	0	0	0	0	0.0404687	0	0	0	0.269172	0.327151	0	0	0	0	0	0	0	0	0.106668	0.138054	0.81635	0	0
Ac_ciRNA_06909	0.0420984	0	0	0	0	0.0796238	0.0403615	0	0.0423501	0.0637858	0	0.0809374	0	0	0	0	0	0	0	0	0	0	0	0	0.088559	0.170669	0.0788881	0.0859316	0.0755486	0.0837755
Ac_ciRNA_06916	0	0	0	0	0	0.0796238	0	0.039197	0	0	0	0.0404687	0.107029	0.0842667	0.0443141	0.157017	0.204469	0.189076	0	0	0	0	0	0	0.110699	0	0	0.15038	0	0
Ac_ciRNA_06926	0	0	0	0	0	0	0	0	0	0	0	0	0	0	0	0	0	0	0	0	0	0	0	0	0.088559	0.106668	0	0.128897	0	0.251327
Ac_ciRNA_06928	0	0	0	0	0	0	0.0403615	0	0	0	0	0	0	0	0	0	0	0	0	0	0	0	0	0	0.110699	0.0426673	0.29583	0.128897	0	0
Ac_ciRNA_06929	0	0.225494	0	0.0399141	0.104534	0.0398119	0	0	0	0	0	0.14164	0	0	0	0	0	0	0	0	0	0	0	0	0.597773	0	0	0	0	0
Ac_ciRNA_06932	0	0	0	0	0.0627206	0	0	0	0	0	0	0	0	0	0	0	0	0	0	0	0	0	0	0	0.088559	0.0426673	0	0	0	0.146607
Ac_ciRNA_06947	0	0	0	0	0	0	0	0.0587955	0.0847003	0.0850477	0	0.0809374	0	0	0	0	0	0	0	0	0	0	0	0	0	0	0	0	0	0
Ac_ciRNA_06948	0	0	0	0	0	0	0	0	0	0	0	0	0	0	0	0	0	0	0.0621699	0.041127	0.0429292	0.0403465	0.0851128	0.0665851	0	0	0	0	0	0
Ac_ciRNA_06954	0	0	0	0	0	0	0.0403615	0	0.0635252	0.0850477	0	0	0	0	0	0	0	0	0	0	0	0	0	0	0	0	0	0	0	0
Ac_ciRNA_06959	0	0	0	0	0	0	0	0	0	0	0	0	0	0	0	0	0	0	0	0	0	0	0.0851128	0.0665851	0	0	0	0	0	0
Ac_ciRNA_06960	0.105246	0.135296	0	0.0399141	0.188162	0.159248	0	0	0	0	0	0	0	0	0	0	0	0	0	0	0	0	0	0	0.398516	0.170669	0	0.494107	0	0.0837755
Ac_ciRNA_06964	0	0	0	0	0	0	0	0	0	0	0	0	0	0.0421334	0	0.067293	0.0408939	0.042017	0	0	0	0	0	0	0	0	0	0	0	0
Ac_ciRNA_06969	0	0	0	0	0	0	0.201807	0.039197	0	0	0.0388462	0	0.0428117	0	0	0	0	0	0	0	0	0	0	0	0	0.0853346	0.039444	0	0	0
Ac_ciRNA_06974	0	0	0.0393795	0	0	0	0	0	0	0.0425238	0	0.0607031	0	0	0	0	0	0	0	0	0	0	0	0	0	0	0.059166	0.0429658	0.0377743	0.125663
Ac_ciRNA_06975	0	0	0	0	0	0	0	0	0	0	0	0	0.0642175	0.105333	0.0443141	0.112155	0.0408939	0	0	0	0	0	0	0	0	0	0	0	0	0
Ac_ciRNA_06985	0	0.0676482	0.118138	0	0	0	0.181627	0.039197	0.0423501	0.148833	0	0.101172	0	0	0	0	0	0	0	0	0	0	0	0	0	0.170669	0.29583	0.0859316	0.358856	0.0418878
Ac_ciRNA_06991	0	0	0	0	0	0.0398119	0	0	0	0	0	0	0	0	0	0	0	0	0	0	0	0	0	0	0.0664193	0.128002	0	0.0644487	0.0944357	0.0837755
Ac_ciRNA_06998	0	0	0	0	0	0	0	0.235182	0.12705	0.10631	0	0	0	0	0	0	0	0	0	0	0	0	0	0	0	0	0.157776	0.257795	0.226646	0.167551
Ac_ciRNA_07000	0	0	0	0	0	0	0	0.0979925	0	0	0	0	0	0	0.0664711	0.044862	0	0.0630255	0	0	0	0	0	0	0	0	0	0	0	0
Ac_ciRNA_07002	0	0	0	0	0	0	0	0	0	0	0	0.0607031	0	0	0	0	0.224916	0.105042	0.31085	0.514088	0.236111	0.403465	0.319173	0.199755	0	0	0	0	0	0
Ac_ciRNA_07006	0	0	0	0	0	0	0	0	0	0	0	0	0.0642175	0.0421334	0.0443141	0	0	0	0	0	0	0	0	0	0	0	0	0	0	0
Ac_ciRNA_07017	0	0	0	0	0	0	0	0	0	0	0	0	0.406711	0.168533	0.265884	0.201879	0.26581	0.336136	0	0	0	0	0	0	0	0	0	0	0	0
Ac_ciRNA_07022	0	0	0	0	0	0	0	0	0	0	0	0	0.214058	0.1896	0	0	0	0.042017	0	0	0	0	0	0	0	0	0	0	0	0
Ac_ciRNA_07025	0	0	0	0	0	0	0.080723	0	0	0.0425238	0	0	0.0856233	0.0421334	0	0.112155	0	0.0630255	0	0	0	0	0	0	0	0	0.059166	0.0429658	0.0377743	0.0418878
Ac_ciRNA_07026	0	0	0	0	0	0	0	0	0	0.0425238	0	0	0	0	0	0	0	0	0	0	0	0	0	0	0	0	0.059166	0.0429658	0	0
Ac_ciRNA_07027	0.0631476	0.0450988	0	0	0	0.0597178	0	0.039197	0.0423501	0	0	0.0404687	0.0642175	0.0421334	0.132942	0.044862	0.0408939	0.042017	0	0	0	0	0	0	0	0	0	0	0	0.0628316
Ac_ciRNA_07030	0	0	0	0	0	0	0.0403615	0	0.0423501	0	0	0	0.0856233	0.0421334	0	0.089724	0.122682	0.105042	0	0	0	0	0	0	0	0	0	0	0	0
Ac_ciRNA_07031	0	0	0	0	0	0	0	0	0	0	0	0	0.107029	0.0421334	0	0	0.0613408	0	0	0	0	0	0	0	0	0	0	0	0	0
Ac_ciRNA_07032	0	0	0	0	0	0	0	0.0587955	0.0635252	0	0	0	0.0428117	0	0	0.067293	0.0408939	0	0	0	0	0	0	0	0.132839	0.0426673	0.216942	0.171863	0.207759	0.0628316
Ac_ciRNA_07036	0	0	0	0	0	0	0	0	0	0	0	0	0.0856233	0.0632001	0	0	0	0.0630255	0	0	0	0	0	0	0	0	0	0	0	0
Ac_ciRNA_07039	0	0	0	0	0	0	0	0	0	0	0	0	0	0	0	0	0.0408939	0.0630255	0	0	0	0	0	0	0	0	0	0	0	0
Ac_ciRNA_07048	0	0	0	0	0	0	0	0	0	0	0	0	0	0	0.0443141	0.134586	0	0.042017	0	0	0	0	0	0	0	0	0	0	0	0
Ac_ciRNA_07049	0	0	0	0	0	0	0	0	0	0	0	0	0.642175	0.610934	0.576083	0.807516	0.490726	0.483195	0	0	0	0	0	0	0	0	0	0	0	0
Ac_ciRNA_07050	0	0	0	0	0	0	0	0	0	0	0	0	0.235464	0.105333	0.132942	0.157017	0.184022	0.294119	0	0	0	0	0	0	0	0	0.0788881	0	0.0566614	0
Ac_ciRNA_07055	0	0	0	0	0	0	0.383434	0	0	0	0	0	0	0	0	0	0	0	0	0	0	0	0	0	0.0664193	0.0426673	0.0986101	0.0429658	0	0
Ac_ciRNA_07056	0	0	0	0	0	0	0	0	0	0	0	0	0	0	0	0	0	0	0	0	0	0	0	0	0	0	0	0.0859316	0.0566614	0.0837755
Ac_ciRNA_07058	0	0	0	0	0	0	0	0	0	0	0	0	0	0	0	0	0	0	0	0	0	0	0	0	0	0	0.0788881	0.0644487	0	0
Ac_ciRNA_07063	0	0	0	0	0	0	0	0	0	0	0	0	0	0.0632001	0.0443141	0.044862	0.0817877	0	0	0	0	0	0	0	0	0	0	0	0	0
Ac_ciRNA_07070	0	0.0676482	0	0	0.0418137	0.0398119	0.0403615	0.0587955	0	0	0	0	0	0	0	0	0	0	0	0	0	0	0	0	0	0	0.059166	0	0	0
Ac_ciRNA_07075	0	0	0	0	0	0	0	0	0	0	0	0	0.535146	0.421334	0.642554	0.67293	0.306704	0.126051	0	0	0	0	0	0	0	0.0426673	0	0	0	0
Ac_ciRNA_07095	0	0	0	0	0	0	0	0	0	0	0	0	0	0	0	0	0	0	0	0.123381	0	0.100866	0.127669	0.0665851	0	0	0	0	0	0
Ac_ciRNA_07097	0	0	0	0	0	0	0	0	0	0	0	0.0404687	0.107029	0	0	0	0.143129	0.105042	0	0	0	0	0	0	0	0	0	0	0	0
Ac_ciRNA_07098	0	0	0	0	0	0	0.141265	0	0	0	0	0	0.235464	0	0.132942	0.044862	0.0613408	0	0	0	0	0	0	0	0	0	0.0788881	0.0859316	0.0944357	0
Ac_ciRNA_07103	0	0.0450988	0.0393795	0	0	0	0.0605422	0.176387	0.0423501	0.10631	0	0.121406	0.0642175	0.105333	0.132942	0.089724	0.102235	0.147059	0	0	0	0	0	0	0.132839	0	0.118332	0	0	0
Ac_ciRNA_07104	0.126295	0.0901976	0.0984487	0.0399141	0.0836275	0.0796238	0.161446	0.176387	0.254101	0.170095	0.0776925	0.182109	0	0	0	0	0	0	0	0	0	0	0	0	0.110699	0.106668	0.059166	0.128897	0	0
Ac_ciRNA_07111	0	0	0	0	0	0	0	0	0	0.0425238	0.0582694	0	0.235464	0	0.132942	0.112155	0.204469	0.0840339	0	0.041127	0	0	0	0	0	0.106668	0.788881	0.128897	0.113323	0
Ac_ciRNA_07112	0.105246	0.135296	0.177208	0.199571	0.0418137	0.477743	0.26235	0.313576	0.254101	0.276405	0.155385	0.384453	0.856233	0.231734	0.288041	0.650499	0.592961	0.252102	0.207233	0.267326	0.236111	0.141213	0.148947	0.22195	0.243537	0.405339	0.808603	0.902282	0	0.188495
Ac_ciRNA_07115	0	0	0	0	0	0	0	0	0	0	0	0	0	0	0.0886281	0	0.102235	0.0840339	0	0	0	0	0	0	0	0	0	0	0	0
Ac_ciRNA_07118	0	0	0	0	0	0	0.0403615	0	0	0.0425238	0	0.0404687	0	0.0421334	0	0	0.0408939	0.042017	0	0	0	0	0	0	0	0	0.059166	0	0	0
Ac_ciRNA_07119	0	0	0	0	0	0	0	0	0	0	0	0	0	0	0.0886281	0.201879	0	0	0	0.123381	0.0643938	0.0403465	0.0425564	0	0	0	0.177498	0	0	0
Ac_ciRNA_07124	0	0	0	0	0	0	0	0	0	0	0	0	0.214058	0.210667	0.110785	0.358896	0.368045	0.252102	0	0	0	0	0	0	0	0	0	0	0	0
Ac_ciRNA_07128	0	0	0	0	0	0	0	0.078394	0.0423501	0.0425238	0	0	0	0	0	0	0	0	0	0	0	0	0	0	0	0	0	0.0644487	0	0
Ac_ciRNA_07134	0	0	0	0	0	0	0	0	0	0	0	0	0	0	0	0	0	0	0.0414466	0.041127	0	0	0	0	0	0	0	0	0	0
Ac_ciRNA_07144	0	0	0	0	0	0	0	0	0	0	0	0	0	0	0	0	0	0	0.0621699	0.143945	0	0.0403465	0.0425564	0	0	0	0	0	0	0
Ac_ciRNA_07149	0	0	0	0	0	0	0	0	0	0	0	0	0	0	0.0664711	0.112155	0	0.0840339	0	0	0	0	0	0	0	0	0	0	0	0
Ac_ciRNA_07151	0.147344	0	0.196897	0	0	0	0	0.13719	0	0.55281	1.3402	0	0.684987	0.758401	1.10785	1.23371	0	0	0	0	0	0	0	0	0	0	0	0	0	0
Ac_ciRNA_07156	0	0	0	0	0	0	0.100904	0.039197	0	0	0	0	0	0	0	0	0	0	0	0	0	0	0	0	0	0	0	0	0	0
Ac_ciRNA_07167	0	0	0	0	0	0	0	0	0	0	0	0	0	0	0	0	0	0	0	0	0	0	0	0	0	0.0426673	0	0.0859316	0.0944357	0.0418878
Ac_ciRNA_07170	0	0	0	0	0	0	0	0	0	0	0	0	0	0	0	0	0.0408939	0	0	0	0	0	0	0	0.0442795	0	0	0	0.0566614	0.104719
Ac_ciRNA_07174	0.105246	0.0676482	0.177208	0.0798283	0	0.139342	0.141265	0.0979925	0	0.10631	0	0.161875	0	0	0	0	0.0613408	0	0	0	0	0	0	0	0.177118	0.320005	0.49305	0.580038	0.717711	0.607372
Ac_ciRNA_07178	0	0.0450988	0	0	0	0	0	0	0	0.0637858	0	0.0809374	0	0	0	0	0	0	0	0	0	0	0	0	0	0.064001	0.0788881	0.107414	0	0
Ac_ciRNA_07181	0	0	0	0	0	0	0	0	0	0	0	0	0	0	0	0	0	0	0.0414466	0.0616905	0	0	0.0638346	0	0	0	0	0	0	0
Ac_ciRNA_07188	0	0	0	0	0	0	0	0	0	0	0	0	2.5687	2.23307	1.26295	1.36829	1.86067	1.70169	0	0	0	0	0	0	0	0	0	0	0	0
Ac_ciRNA_07192	0	0	0	0	0	0	0	0	0	0	0	0	0.0642175	0.0632001	0.0443141	0	0	0.0630255	0	0	0	0	0	0	0	0	0.039444	0	0	0
Ac_ciRNA_07193	0	0	0	0	0	0	0	0	0	0	0	0	0.128435	0.147467	0.0443141	0.067293	0.122682	0.105042	0	0	0	0	0	0	0	0	0	0	0	0
Ac_ciRNA_07197	0.0420984	0	0	0	0	0	0.121084	0.039197	0	0.0425238	0	0	0.0428117	0	0	0.067293	0.0408939	0	0	0	0	0	0	0	0	0	0	0	0.0566614	0.0418878
Ac_ciRNA_07200	0	0	0	0	0	0	0	0	0	0	0	0	0.0642175	0.0421334	0.0664711	0	0.0817877	0.042017	0	0	0	0	0	0	0	0	0.039444	0	0	0
Ac_ciRNA_07209	0	0	0	0	0	0	0	0	0	0	0	0	0.192652	0	0.177256	0.157017	0.0817877	0	0	0	0	0	0	0	0	0	0	0	0	0
Ac_ciRNA_07223	0	0	0	0	0	0	0	0	0	0	0	0	0.171247	0	0.132942	0.067293	0.0613408	0.126051	0	0	0	0	0	0	0	0	0	0	0	0
Ac_ciRNA_07224	0.0420984	0	0	0.0598712	0	0	0	0	0	0.0637858	0	0	0	0	0	0	0	0	0	0	0	0	0	0	0.0442795	0.064001	0.0788881	0.0644487	0	0
Ac_ciRNA_07226	0	0.0901976	0.157518	0.0598712	0.0627206	0.139342	0.221988	0.13719	0.0847003	0.531548	0.0582694	0.283281	0.235464	0.147467	0.0664711	0.112155	0.143129	0.27311	0	0	0	0	0	0	0.110699	0.0426673	0.0788881	0	0	0.104719
Ac_ciRNA_07238	0	0	0	0.0598712	0	0.0398119	0.080723	0.078394	0.0423501	0	0.0388462	0	0.107029	0.0421334	0	0.134586	0.102235	0	0	0	0	0	0	0	0	0.149336	0	0.171863	0.13221	0.0628316
Ac_ciRNA_07243	0.0841968	0	0.196897	0.0399141	0.0627206	0.0398119	0.221988	0	0	0.0425238	0	0.0404687	0.107029	0	0.0886281	0.089724	0.163575	0.0840339	0	0	0	0	0	0	0	0.0426673	0.216942	0	0	0
Ac_ciRNA_07244	0	0	0	0	0	0	0	0	0	0	0	0	0.0856233	0	0.110785	0.067293	0.0817877	0.042017	0	0	0	0	0	0	0	0	0	0	0	0
Ac_ciRNA_07250	0	0	0	0	0	0	0	0	0	0	0	0	0.128435	0.231734	0.0886281	0.089724	0.245363	0.147059	0	0	0	0	0	0	0	0	0	0	0	0
Ac_ciRNA_07255	0	0	0	0	0	0	0	0.568357	0.571727	0.0850477	0.116539	0.202344	0	0	0	0	0	0	0	0	0	0	0	0	0	0	0	0	0	0
Ac_ciRNA_07259	0	0	0	0	0	0	0	0	0.12705	0.170095	0	0	0	0	0	0	0	0	0	0	0	0	0	0	0	0	0	0	0	0
Ac_ciRNA_07262	0	0	0	0	0	0	0	0	0	0	0	0	0.128435	0.147467	0.0664711	0.201879	0.0408939	0.189076	0	0	0	0	0	0	0	0	0	0	0	0
Ac_ciRNA_07270	0	0	0	0	0	0	0	0	0	0	0	0	0.25687	0.4424	0.199413	0.269172	0.368045	0.294119	0	0	0	0	0	0	0	0	0	0	0	0
Ac_ciRNA_07272	0	0	0	0	0	0	0.080723	0.078394	0	0	0	0	0	0	0	0	0	0	0	0	0	0	0	0	0.0442795	0.277337	1.30165	1.05266	1.09545	0.879643
Ac_ciRNA_07274	0	0	0	0	0	0	0	0	0	0	0	0	0	0	0	0	0	0	0	0	0	0	0	0	0	0	0.118332	0.193346	0	0.0628316
Ac_ciRNA_07278	0	0	0	0	0	0	0	0	0	0	0	0	0.107029	0.0842667	0	0	0.0408939	0.042017	0	0	0	0	0	0	0	0	0	0	0	0
Ac_ciRNA_07282	0.0631476	0.0450988	0	0	0	0.0398119	0.0403615	0	0	0	0	0.0404687	0	0	0	0	0	0	0	0	0	0	0	0	0.0442795	0.149336	0.0986101	0	0.0944357	0.0628316
Ac_ciRNA_07283	0	0	0	0	0	0	0	0	0	0	0	0.0404687	0	0	0	0	0	0	0	0.0616905	0	0	0	0	0	0	0.177498	0.0859316	0	0
Ac_ciRNA_07284	0	0	0	0	0	0	0	0	0	0	0.0582694	0	0	0	0	0	0	0	0.0414466	0.0616905	0.0643938	0	0	0	0	0	0	0	0	0
Ac_ciRNA_07288	0	0	0	0	0	0	0	0	0	0	0	0	0	0	0	0	0	0	0.290126	0.329016	0	0	0	0	0	0	0	0	0	0
Ac_ciRNA_07290	0	0	0	0	0	0	0	0	0	0	0.271924	0	0	0	0.0886281	0	0	0	0.746039	0.102818	0.150252	0.141213	0.553233	0.244145	0	0	0	0	0	0
Ac_ciRNA_07298	0	0	0.0393795	0.0399141	0	0	0	0	0	0	0	0	0	0	0	0	0	0	0	0	0	0	0	0	0.0664193	0.064001	0.039444	0.107414	0.0944357	0.104719
Ac_ciRNA_07301	0	0	0	0	0	0	0	0	0	0	0	0	0.192652	0.210667	0.155099	0.112155	0.0408939	0	0	0	0	0	0	0	0	0	0	0	0	0
Ac_ciRNA_07305	0	0	0	0	0	0	0	0	0	0	0.155385	0	0	0	0	0	0	0	0.24868	0.267326	0.321969	0.221906	0.276617	0.532681	0	0	0	0	0	0
Ac_ciRNA_07308	0	0	0	0	0	0	0	0	0	0	0	0	0	0	0	0	0	0	0	0	0	0	0	0	0	0	0.059166	0.107414	0	0
Ac_ciRNA_07309	0	0	0	0	0	0	0	0	0	0	0	0	0	0	0	0	0	0	0	0	0	0	0	0	0	0	0.039444	0.128897	0	0.0418878
Ac_ciRNA_07314	0	0	0	0.0598712	0	0	0	0	0	0	0.116539	0	0.214058	0	0.0886281	0.179448	0	0.0840339	0	0	0.0643938	0	0	0	0	0	0	0	0	0.104719
Ac_ciRNA_07324	0	0	0	0	0	0	0	0	0	0	0	0	0	0	0	0	0	0	0.0621699	0.123381	0.128788	0	0.0425564	0	0	0	0	0	0	0
Ac_ciRNA_07328	0	0.0676482	0.0984487	0.0997853	0.104534	0.0398119	0.121084	0	0	0	0	0.0404687	0	0	0	0	0	0	0	0	0	0	0	0	0.154978	0.0853346	0	0	0	0
Ac_ciRNA_07329	0	0	0	0	0	0	0	0	0	0	0	0	0	0	0	0	0	0	0	0	0	0	0	0	0.0442795	0.0426673	0.0788881	0.107414	0.0566614	0.104719
Ac_ciRNA_07331	0	0	0	0	0	0	0	0.039197	0.190576	0.0637858	0	0.0607031	0	0	0	0	0	0	0	0	0	0	0	0	0	0	0	0	0	0
Ac_ciRNA_07332	0.0420984	0.0676482	0.0984487	0.0997853	0.0418137	0	0	0.0979925	0	0	0	0.0607031	0	0	0	0	0	0	0	0	0	0.0403465	0.0638346	0.0443901	0	0	0.276108	0	0	0
Ac_ciRNA_07333	0	0	0	0	0	0	0	0	0	0	0	0.0404687	0.0642175	0	0	0	0	0	0.0414466	0.0616905	0	0	0	0	0	0	0	0	0	0
Ac_ciRNA_07334	0	0.0901976	0.0590692	0.0798283	0	0	0	0	0	0	0	0	0	0.0421334	0	0	0	0	0	0	0	0	0	0	0	0.298671	0	0.0429658	0.0755486	0
Ac_ciRNA_07335	0.105246	0.248043	0	0	0.146348	0.159248	0.403615	0.176387	0.0635252	0	0	0.101172	0	0	0	0	0	0	0	0	0	0	0	0	0.664193	1.00268	0.867769	1.09563	0.566614	0
Ac_ciRNA_07341	0	0.0450988	0	0.0598712	0	0	0	0.176387	0.0423501	0.0637858	0	0.0607031	0	0	0	0	0	0	0	0	0	0	0	0	0	0	0.19722	0.0859316	0.0566614	0
Ac_ciRNA_07345	0	0	0	0	0.0418137	0	0	0	0	0	0	0	0	0	0	0	0	0	0	0	0	0	0	0	0.132839	0.0853346	0.315552	0.236312	0.226646	0.314158
Ac_ciRNA_07349	0	0	0	0	0	0	0	0	0.105875	0.10631	0	0.0404687	0	0	0	0	0	0	0	0	0	0	0	0	0	0	0	0	0	0
Ac_ciRNA_07352	0.0420984	0	0	0	0	0	0	0	0	0	0	0	0	0	0	0.044862	0.122682	0.042017	0	0	0	0	0	0	0.0664193	0	0	0.0429658	0	0
Ac_ciRNA_07357	0	0	0	0	0	0	0	0	0	0	0.213654	0	0	0	0	0	0	0	0.0828932	0.699159	0.364898	0.74641	0.191504	0.0665851	0	0	0	0	0	0
Ac_ciRNA_07363	0	0	0	0	0	0	0	0	0	0	0	0	0	0.0632001	0.243727	0.089724	0.0408939	0.042017	0	0	0	0	0	0	0	0	0	0	0	0
Ac_ciRNA_07366	0	0	0	0	0	0	0	0	0	0	0	0	0	0	0	0	0	0	0.0621699	0.041127	0.0858584	0	0.0425564	0	0	0	0	0	0	0
Ac_ciRNA_07370	0	0	0	0	0	0	0	0	0	0	0	0	0.535146	0.1896	0.22157	0.201879	0.388492	0.69328	0	0	0	0	0	0	0	0	0	0	0	0
Ac_ciRNA_07373	0	0	0	0	0	0	0	0	0	0	0	0	0.0642175	0	0	0	0	0.0630255	0	0	0	0	0	0	0	0.0426673	0.039444	0.0429658	0	0
Ac_ciRNA_07374	0	0	0	0	0	0	0	0	0	0	0	0	0.128435	0.0632001	0.0886281	0.134586	0.184022	0.105042	0	0	0	0	0	0	0	0	0	0.0644487	0	0
Ac_ciRNA_07385	0	0	0	0	0	0	0	0	0	0	0	0	0	0	0.0443141	0.044862	0	0.126051	0	0	0	0	0	0	0	0	0	0	0	0
Ac_ciRNA_07391	0	0	0	0	0	0	0	0	0	0	0.0971156	0	0	0	0	0	0	0	0.18651	0.143945	0.0858584	0.080693	0.23406	0.288535	0	0	0	0	0	0
Ac_ciRNA_07396	0	0	0	0	0	0.0398119	0	0	0	0	0	0	0	0	0.132942	0.044862	0	0	0	0	0	0	0	0	0	0	0	0	0.0566614	0
Ac_ciRNA_07397	0	0	0	0	0	0	0	0.607554	1.20698	0.914262	0.213654	0.728437	0	0	0	0	0	0	0	0	0	0	0	0	0	0	0	0	0	0
Ac_ciRNA_07398	0.0841968	0.202945	0	0.0798283	0.250882	1.05501	0	0	0.0847003	0.0850477	0.116539	0.0607031	0.278276	0.1896	0.155099	0	0.245363	0.231093	0	0.185072	0	0	0	0.0443901	1.77118	0.896013	0	0.193346	0	0
Ac_ciRNA_07408	0	0.0450988	0	0.0399141	0	0.0398119	0.100904	0	0	0	0	0	0	0	0	0	0	0	0	0	0	0	0	0	0	0	0.0788881	0.0644487	0	0.0837755
Ac_ciRNA_07410	0.0420984	0	0	0	0.0418137	0	0	0	0	0	0	0	0	0	0	0	0	0	0	0	0	0	0	0	0.088559	0.0426673	0	0.15038	0	0.188495
Ac_ciRNA_07411	0.126295	0.0676482	0.295346	0.199571	0.104534	0.278683	0.26235	0.078394	0.105875	0.127572	0	0.101172	0	0	0	0	0	0	0	0	0	0	0	0	0.088559	0.149336	0.059166	0.0644487	0	0.104719
Ac_ciRNA_07414	0	0	0	0	0.146348	0	0.0605422	0.078394	0	0	0.0776925	0	0	0	0	0	0	0	0	0.041127	0	0	0	0	0.442795	0	0	0	0	0
Ac_ciRNA_07415	0	0	0	0	0.0418137	0	0.080723	0.039197	0	0.0425238	0	0	0.0856233	0.0421334	0	0	0.0408939	0	0	0	0	0	0	0	0	0	0.0788881	0	0	0
Ac_ciRNA_07417	0.189443	0	0	0.179614	0.104534	0.696708	0.0605422	0	0	0.0850477	0.116539	0.161875	0.0428117	0	0	0	0	0	0	0	0	0	0	0	0	0.277337	0	0	0	0
Ac_ciRNA_07418	0	0.135296	0	0	0.0627206	0.378213	0	0	0	0	0	0	0.0428117	0	0	0	0	0	0	0	0	0	0	0	0.0664193	0.0426673	0	0	0	0
Ac_ciRNA_07421	0	0	0	0	0	0	0	0	0	0	0	0	0.128435	0.0842667	0	0	0	0	0.0621699	0	0	0	0	0	0	0	0	0	0	0
Ac_ciRNA_07423	0	0	0	0	0	0	0	0.039197	0	0.0425238	0.0388462	0.121406	0	0	0	0	0	0	0	0	0	0	0	0	0	0	0	0	0	0
Ac_ciRNA_07428	0	0	0	0	0	0	0	2.41062	0	5.33674	0	0	0	0.105333	0	0	0	0	0.808209	2.38537	3.71338	4.51881	0	6.32558	0	0	0	0	0	0
Ac_ciRNA_07429	0	0	0	0	0	0	0	0.568357	0.508202	1.42455	1.01	1.37594	0	0	0	0	0	0	0	0	0	0	0	0	0	0	0	0	0	0
Ac_ciRNA_07431	0	0	0	0	0	0	0	0	0.0847003	0.318929	0	0.303515	0	0	0	0	0	0	0	0	0	0	0	0	0	0	0	0	0	0
Ac_ciRNA_07432	0.336787	0.405889	0.255967	0.399141	0.543579	0.497648	0.403615	0.0979925	0.232926	0.255143	0.252501	0.445156	0.278276	0.273867	0.199413	0.291603	0.511173	0.294119	0.31085	0.596342	0.236111	0.302599	0.191504	0.26634	1.54978	0.938681	0.49305	0.300761	0.339968	0.27227
Ac_ciRNA_07437	0	0	0	0	0	0	0	0	0	0	1.92289	0	0	0	0	0	0	0	0.621699	1.99466	0.751261	1.08936	1.25541	0	0	0	0	0	0	0
Ac_ciRNA_07443	0	0	0	0	0	0	0	0	0	0	0	0.0404687	0	0	0	0	0	0	0	0	0	0	0	0	0.088559	0.0853346	0.039444	0	0	0
Ac_ciRNA_07445	0	0	0	0	0	0	0	0	0	0	0	0	1.73387	0	2.32649	1.81691	0.961006	0	0	0	0	0	0	0	0	0	0	0	0	0
Ac_ciRNA_07447	0	0	0	0	0	0	0	0.117591	0.254101	0.148833	0.0388462	0.182109	0	0	0	0	0	0	0	0	0	0	0	0	0	0	0	0	0	0
Ac_ciRNA_07451	0	0	0	0	0	0	0	0	0	0	0	0	0	0	0	0	0	0	0	0	0	0	0	0	0	0.0853346	0.335274	0.537072	0.0755486	0
Ac_ciRNA_07454	0	0	0	0	0	0	0	0	0	0	2.15597	0	0	0	0	7.49196	0	0	0	0.843104	1.35227	1.61386	1.42564	0	0	0	0	0	0	0
Ac_ciRNA_07459	0	0.112747	0.0393795	0	0.104534	0	0	0	0	0	0	0	0	0	0	0	0	0	0	0	0	0	0	0	0.088559	0.277337	0.276108	0.171863	0.52884	0.104719
Ac_ciRNA_07460	0	0	0	0	0	0	0	0	0	0	0	0	0	0	0	0	0	0	0	0	0	0	0	0	0	0	0.0986101	0	0.0377743	0.0628316
Ac_ciRNA_07473	0	0	0	0	0	0	0	0	0	0	0	0	0	0	0	0	0	0	0	0	0	0	0	0	0	0	0.138054	0.0644487	0.13221	0.125663
Ac_ciRNA_07486	0	0	0	0	0	0	0	0	0	0	0	0	0.0428117	0.0632001	0	0.044862	0	0	0	0	0	0	0	0	0	0	0	0	0	0
Ac_ciRNA_07502	0	0.0450988	0	0	0	0	0.080723	0	0.0635252	0	0	0	0	0	0	0	0	0	0	0	0	0	0	0	0	0.064001	0.19722	0.0644487	0.321081	0.167551
Ac_ciRNA_07503	0	0	0	0	0	0	0	0	0	0	0	0	0	0	0	0	0	0	0	0	0	0	0	0	0	0	0	0	0.0566614	0.0837755
Ac_ciRNA_07506	0	0	0	0	0	0	0	0	0	0	0	0	0.128435	0	0.155099	0	0.0817877	0.0840339	0	0	0	0	0	0	0	0	0	0	0	0
Ac_ciRNA_07508	0	0	0	0	0	0	0	0	0	0	0	0	0.492334	0.231734	0.265884	0.157017	0.204469	0.294119	0	0	0	0	0	0	0	0	0	0	0	0
Ac_ciRNA_07510	0	0	0	0	0	0	0	0	0	0	0	0	0.0428117	0.1264	0	0	0.0408939	0	0	0	0	0	0	0	0	0	0	0	0	0
Ac_ciRNA_07516	0	0	0	0	0	0	0.181627	0	0.0423501	0	0	0.0404687	0.0642175	0.0421334	0.0443141	0.044862	0	0.042017	0	0	0	0	0.0425564	0	0.110699	0.064001	0	0	0	0
Ac_ciRNA_07519	0	0	0	0	0	0	0	0	0	0.0637858	0	0	0	0	0.0664711	0.044862	0	0	0	0	0	0	0	0	0	0	0	0	0	0
Ac_ciRNA_07523	0	0	0	0	0	0	0	0	0	0	0	0	0.0428117	0.0632001	0	0.044862	0.0408939	0.042017	0	0	0	0	0	0	0	0	0	0	0	0
Ac_ciRNA_07530	0	0	0	0	0	0	0	0.039197	0	0	0	0	0	0	0	0	0	0	0	0	0	0	0	0	0.0442795	0.064001	0.157776	0.15038	0.151097	0.293214
Ac_ciRNA_07534	0.210492	0.270593	0	0	0.0836275	0.0398119	0.0403615	0	0	0	0	0	0	0	0	0	0	0	0	0	0	0	0	0	0.730612	0.448007	0.354996	0.107414	0.0377743	0.293214
Ac_ciRNA_07536	0	0	0	0	0	0	0	0	0	0	0	0	0	0	0	0	0	0	0.0621699	0	0.0429292	0.0605197	0.0638346	0.0443901	0	0	0	0	0	0
Ac_ciRNA_07541	0	0.0901976	0	0	0	0.0398119	0	0	0	0	0.0388462	0	0	0	0	0	0	0	0.331573	0.34958	0.107323	0.121039	0.212782	0.0665851	0	0.064001	0	0.0429658	0	0
Ac_ciRNA_07542	0.0631476	0	0	0.0798283	0	0.139342	0	0	0	0	0	0	0	0	0	0	0	0	0	0	0	0	0	0	0.177118	0.0853346	0.0788881	0.193346	0	0.0837755
Ac_ciRNA_07553	0	0	0	0	0	0	0	0	0	0.127572	0	0.0809374	0.128435	0.0421334	0.132942	0.044862	0.0408939	0.0840339	0	0	0	0	0	0	0	0	0	0	0	0
Ac_ciRNA_07556	0	0	0	0	0	0	0	0	0	0	0	0	0.321087	0.2528	0.199413	0.269172	0	0	0	0	0	0	0	0	0	0	0	0	0	0
Ac_ciRNA_07558	0	0	0	0	0	0	0	0	0	0	0	0	0	0	0	0.089724	0.0817877	0.042017	0	0	0	0	0	0	0	0	0	0	0	0
Ac_ciRNA_07562	0	0	0	0	0	0	0	0	0	0	0	0	0.0642175	0.0632001	0.0443141	0	0.0613408	0	0	0	0	0	0	0	0	0	0	0	0	0
Ac_ciRNA_07575	0	0.0901976	0	0	0.0418137	0.0398119	0.0605422	0	0.0423501	0	0	0.0607031	0	0	0	0	0.0613408	0.042017	0	0	0	0	0	0	0.0664193	0.0426673	0.0788881	0.0859316	0	0.0837755
Ac_ciRNA_07576	0	0	0	0	0	0	0	0	0.0635252	0	0	0.0404687	0.0428117	0	0.110785	0.112155	0.122682	0	0	0	0	0	0	0	0	0	0	0	0	0
Ac_ciRNA_07578	0	0	0	0	0	0	0	0	0	0	0.0388462	0	0	0.0842667	0.0443141	0.112155	0.0408939	0	0.0828932	0	0	0.121039	0.0425564	0.0665851	0.0442795	0.0426673	0	0	0	0
Ac_ciRNA_07580	0	0.0450988	0	0	0	0	0	0	0	0	0	0	0	0	0.110785	0.179448	0.122682	0.042017	0	0	0	0	0	0	0.0442795	0	0	0	0	0.0628316
Ac_ciRNA_07581	0	0	0	0	0	0	0	0	0	0	0	0	0	0	0	0	0	0	0	0	0	0	0	0	0	0	0.0788881	0	0.0944357	0.293214
Ac_ciRNA_07584	0	0	0	0	0	0	0	0	0	0	0.0971156	0	0	0	0	0	0	0	0.103617	0.0822541	0.0643938	0.141213	0.0425564	0.110975	0	0	0	0	0	0
Ac_ciRNA_07595	0	0	0	0	0	0	0	0	0.0423501	0.0425238	0	0.0404687	0	0	0	0	0	0	0	0	0	0	0	0	0	0	0	0	0	0
Ac_ciRNA_07596	0	0	0	0	0	0	0	0.705546	0.614077	0.807953	0.0776925	0.445156	0	0	0	0	0	0	0	0	0	0	0	0	0	0	0	0	0	0
Ac_ciRNA_07604	0	0	0	0	0	0	0	0	0	0	0	0	0	0	0	0	0	0	0.0414466	0.226199	0	0.0403465	0.0638346	0	0	0	0	0	0	0
Ac_ciRNA_07608	0	0	0	0	0	0	0	0	0	0	0.194231	0	0	0	0	0	0	0	0.290126	0.102818	0.214646	0.221906	0	0.17756	0	0	0	0	0	0
Ac_ciRNA_07610	0	0.0901976	0.0590692	0	0	0.179153	0	0.0587955	0.0423501	0.10631	0.349616	0	0.107029	0.273867	0.177256	0.112155	0.306704	0.168068	0.165786	0.185072	0.107323	0.201732	0.148947	0.332926	0.531354	0.597342	0.216942	0.257795	0	0.251327
Ac_ciRNA_07621	0	0	0	0	0	0.0398119	0.0605422	0	0.0423501	0	0	0	0	0	0	0	0	0	0	0	0	0	0	0	0	0	0.0788881	0.0859316	0	0
Ac_ciRNA_07626	0	0	0	0	0	0	0	0	0	0	0.233077	0	0	0	0	0	0	0	0.12434	0.205635	0.193181	0	0.148947	0.17756	0	0	0	0	0	0
Ac_ciRNA_07631	0	0	0.0984487	0	0	0	0	0	0.232926	0	0	0.121406	0.149841	0	0.132942	0.089724	0.245363	0	0	0	0	0	0	0	0.221398	0	0	0.51559	0.339968	0
Ac_ciRNA_07632	0	0	0	0	0	0	0.121084	0	0	0	0	0.0809374	0	0	0	0	0	0	0	0.0616905	0	0	0	0	0	0.0213337	0.0788881	0.107414	0	0
Ac_ciRNA_07633	0	0	0	0	0	0	0	0	0	0	0	0	0	0	0	0	0	0	0	0	0	0	0	0	0	0	0	0	0.0377743	0.0418878
Ac_ciRNA_07635	0	0	0	0	0	0	0	0	0	0	0.0388462	0.101172	0	0	0.0443141	0	0.0613408	0.042017	0	0	0	0	0	0	0	0	0.059166	0.0429658	0.0377743	0
Ac_ciRNA_07641	0	0	0	0	0	0	0	0	0	0	0	0	0	0	0	0	0	0	0	0.123381	0.0429292	0.080693	0.148947	0	0	0	0	0	0	0
Ac_ciRNA_07647	0	0	0	0	0	0	0	0	0	0	0	0	0	0	0	0	0	41.996	0	53.3006	0	0	57.0256	56.8637	0	0	0	0	0	0
Ac_ciRNA_07653	0	0	0	0	0	0	0	0	0	0	0	0	0	0	0.0664711	0.067293	0.0613408	0	0	0	0	0	0	0	0	0	0	0	0	0
Ac_ciRNA_07654	0	0.0676482	0	0	0.0627206	0	0	0	0.0423501	0.0425238	0	0.0809374	0	0	0	0	0	0	0	0	0	0	0	0	0	0.064001	0	0.107414	0	0
Ac_ciRNA_07661	0	0	0	0	0	0	0	0	0	0	0	0	0.941857	1.47467	0.709025	0	0	0.861348	0	0	0	0	0	0	0	0	0	0	0	0
Ac_ciRNA_07670	0.0631476	0.0450988	0	0.0399141	0	0	0	0.156788	0.0635252	0.0425238	0	0	0.0642175	0	0.0886281	0	0	0.042017	0	0	0	0	0	0	0.0442795	0.064001	0.0986101	0	0	0
Ac_ciRNA_07673	0	0	0	0	0	0	0	0	0	0	0	0	0	0	0	0	0	0	0	0	0	0	0	0	0.0664193	0.0426673	0	0	0	0
Ac_ciRNA_07675	0	0	0	0.0399141	0.146348	0	0	0	0	0	0	0	0	0	0.664711	0.583206	0	0	0	0	0.107323	0	0	0	0	0	0	0	0	0
Ac_ciRNA_07688	0	0	0	0	0	0.0398119	0	0	0	0	0	0	0	0	0	0	0.0408939	0	0	0	0	0	0	0	0	0	0.059166	0.171863	0.0755486	0.125663
Ac_ciRNA_07689	0	0	0	0	0	0	0	0	0	0	0	0	0.0428117	0.0632001	0	0	0	0.0630255	0	0	0	0	0	0	0	0	0	0	0	0
Ac_ciRNA_07692	0.0841968	0.180395	0	0.0798283	0.146348	0.139342	0.0605422	0.078394	0	0	0.0388462	0.0404687	0.0428117	0.0421334	0	0.134586	0.0613408	0.042017	0.145063	0.123381	0.150252	0.100866	0.106391	0.0665851	0.398516	0.704011	0	0.730418	0	0.712092
Ac_ciRNA_07707	0	0	0	0	0	0	0	0	0	0	0	0	0.0642175	0	0	0	0.122682	0.042017	0	0	0	0	0	0	0	0	0	0	0	0
Ac_ciRNA_07709	0	0	0	0	0	0	0	0	0	0	0.93231	0	0	0	0	0	0	0	0.145063	0.699159	0.515151	1.47265	0.340451	1.62024	0	0	0	0	0	0
Ac_ciRNA_07710	0	0	0	0	0	0	0	0	0	0	0	0	0.77061	0.484534	0.664711	0.695361	0.695196	0.399161	0	0	0	0	0	0	0	0	0	0	0	0
Ac_ciRNA_07714	0	0.135296	0	0	0	0	0	0.13719	0	0.0850477	0.174808	0	0.321087	0.1896	0.199413	0.358896	0.184022	0.105042	0.0828932	0.34958	0.128788	0	0	0	0	0	0	0	0	0
Ac_ciRNA_07715	0	0	0	0	0	0.218965	0.0605422	0	0.105875	0.0637858	0	0	0	0	0	0	0	0	0	0	0	0	0	0	0	0.426673	0	0	0.113323	0.523597
Ac_ciRNA_07722	0	0	0	0	0	0	0	0	0	0	0	0	0	0	0	0	0	0	0.455913	0.945922	0.601009	0	0.723459	0	0	0	0	0	0	0
Ac_ciRNA_07724	0	0	0	0	0	0	0	0.117591	0	0	0.233077	0	1.13451	0.884801	0.841967	1.14398	1.16548	1.05042	0	0	0	0	0.212782	0	0	0	0	0	0	0
Ac_ciRNA_07726	0	0.0450988	0	0	0	0	0	0	0	0	0	0	0	0.0632001	0	0	0	0	0.227956	0	0.27904	0.504331	0.59579	0	0	0	0	0	0	0
Ac_ciRNA_07727	0	0	0	0	0	0	0	0	0	0	0	0	0	0	0	0	0.388492	0.147059	0	0	0	0	0	0	0	0	0	0	0	0
Ac_ciRNA_07728	0	0	0	0	0	0	0	0	0.169401	0	0	0	0	0	0	0	0	0	0.31085	0.678596	0	0	0.82985	0	0	0	0	0	0	0
Ac_ciRNA_07729	0	0	0	0	0	0	0	0	0	0	0.524424	0	0	0	0	0	0	0	0.18651	0.596342	0.171717	0.322772	0.957519	2.17511	0	0	0	0	0	0
Ac_ciRNA_07734	0	0	0	0	0	0.0398119	0	0	0	0	0	0	0	0	0	0	0	0	0	0	0	0	0	0	0.110699	0.362672	0.276108	0.300761	0.13221	0.251327
Ac_ciRNA_07737	0.0420984	0.0676482	0	0	0	0.0398119	0.161446	0	0	0.0425238	0.0388462	0.0404687	0	0.0421334	0.0664711	0	0	0	0.227956	0.123381	0	0.080693	0.0425564	0.0443901	0.110699	0.213337	0.453606	0.257795	0.188871	0.27227
Ac_ciRNA_07741	0	0	0	0	0	0	0	0	0	0	0	0	0	0	0	0	0	0	0.352296	0.390707	0	0	0	0	0	0	0	0	0	0
Ac_ciRNA_07742	0	0	0	0	0	0	0	0	0	0	0	0	0	0	0	0	0	0	0	1.66564	0.300505	0	0.510677	0.488291	0	0	0	0	0	0
Ac_ciRNA_07747	0	0	0	0	0	0	0	0	0	0	0	0	0.0428117	0.0421334	0	0	0	0	0	0	0	0	0	0	0	0	0	0	0	0
Ac_ciRNA_07751	0	0	0	0.0399141	0	0	0	0	0	0	0	0	0	0	0	0	0	0	0	0	0	0	0	0	0.0442795	0.0853346	0	0	0	0.167551
Ac_ciRNA_07755	0	0	0	0	0	0	0	0	0	0	0	0	0	0	0	0	0	0	0	0	0	0	0	0	0.088559	0	0	0	0.0377743	0.0628316
Ac_ciRNA_07757	0.0420984	0	0	0.0399141	0	0	0.242169	0.0979925	0	0.0425238	0	0.101172	0.0642175	0.0421334	0	0.044862	0	0.042017	0	0	0	0	0	0	0.0442795	0.064001	0.059166	0	0	0.0628316
Ac_ciRNA_07761	0	0	0	0	0	0.855955	0	0	0	0	1.08769	0	0	0	0	0	0	0	0.870379	0	2.72601	1.49282	1.44692	0	0	0	0	0	0	0
Ac_ciRNA_07765	0	0	0	0	0	0	0	0	0.698777	0.403976	0.466155	0	0	0	0	0	0	0	0	0	0	0	0	0	0	0	0	0	0	0
Ac_ciRNA_07766	0	0	0	0	0	0	0	0	0	0	0	0	2.71854	1.8328	0	4.46377	0	2.39497	0.0828932	0	0	0	0	0	0	0	0	0	0	0
Ac_ciRNA_07767	0	0	0	0	0	0	0	0	0	0	0.330193	0	0	0	0	0	0	0	0.145063	0.514088	0.150252	0.121039	0.23406	0.199755	0	0	0	0	0	0
Ac_ciRNA_07770	0	0	0	0	0	0	0	0	0	0	0	0	0	0	0	0.134586	0	0	0.663146	0.102818	0	0	0.0851128	0	0	0	0	0	0	0
Ac_ciRNA_07772	0	0	0	0	0	0	0	0	0	0	0	0	0	0	0	0	0	0	0	0.287889	0	0	0.0851128	0	0.92987	0.064001	0	0	0	0
Ac_ciRNA_07786	0	0	0	0.0399141	0	0.0597178	0.0403615	0.0587955	0	0	0	0.101172	0.0428117	0	0	0	0.0408939	0	0	0	0	0	0	0	0	0	0	0	0	0
Ac_ciRNA_07789	0	0	0	0	0	0	0	0.117591	0.105875	0.212619	0	0.364218	0	0	0	0	0	0	0	0	0	0	0	0	0	0	0	0	0	0
Ac_ciRNA_07791	0	0	0	0	0	0	0	0	0	0	0	0	0.813422	0.547734	1.39589	1.61503	1.67665	1.07143	0	0	0	0	0	0	0	0	0	0	0	0
Ac_ciRNA_07793	0	0	0	0	0	0	0	0	0	0	0	0	0	0	0	0	0	0	0	0	0	0	0	0	0	0.0426673	0.039444	0.0859316	0.0566614	0
Ac_ciRNA_07794	0	0	0	0	0	0	0	0.13719	0	0	0	0	0	0	0	0.044862	0	0	0	0	0.0429292	0.0605197	0	0	0	0	0	0	0	0
Ac_ciRNA_07797	0	0	0	0	0	0	0	0	0	0.233881	0.135962	0.647499	3.72461	2.10667	0	0	1.90156	4.81094	0	0	0	0	0.191504	0	0	0	0	0	0	0
Ac_ciRNA_07798	0.147344	0	0.118138	0.0399141	0.66902	0.0398119	0	0.254781	0	0	0	0	0	0	0	0	0	0	0	0	0	0	0	0	0	0	0	0	0	0
Ac_ciRNA_07802	0.0420984	0	0.0590692	0.0598712	0	0	0.242169	0	0	0.148833	0	0.202344	0	0.231734	0	0	0	0	0	0.041127	0	0.0605197	0	0.0887801	0.177118	0.23467	0.118332	0	0	0
Ac_ciRNA_07808	0	0	0	0	0	0	0	0	0	0	0.0388462	0	0	0	0	0	0	0	0.0621699	0.102818	0.0858584	0.221906	0.0425564	0	0	0	0	0	0	0
Ac_ciRNA_07820	0	0	0.0393795	0.0399141	0	0.0398119	0	0	0	0	0	0	0	0	0	0	0	0	0	0	0	0	0	0	0	0	0	0.0429658	0	0
Ac_ciRNA_07822	0	0	0	0.0399141	0	0	0.0403615	0	0.0423501	0	0	0	0.0428117	0	0.0664711	0	0.0408939	0	0	0	0	0	0	0	0.110699	0.0853346	0.157776	0.171863	0.0377743	0.0837755
Ac_ciRNA_07825	0	0	0	0	0	0	0	0	0	0	0	0	0.0642175	0	0.177256	0.089724	0.204469	0.0840339	0	0	0	0	0	0	0	0	0	0	0	0
Ac_ciRNA_07826	0	0	0	0	0	0	0	0	0	0	0	0	0.128435	0.0632001	0.0886281	0.044862	0.102235	0.0630255	0	0	0	0	0	0	0	0	0	0	0	0
Ac_ciRNA_07829	0.0420984	0.0450988	0	0	0	0	0.0605422	0.156788	0	0	0	0	0	0	0	0	0	0	0	0	0	0	0	0	0.287817	0.149336	0.216942	0.214829	0.0566614	0.146607
Ac_ciRNA_07834	0	0	0	0	0	0	0	0	0	0	0	0	0	0	0	0	0	0	0	0	0	0	0.127669	0.0887801	0	0	0	0	0	0
Ac_ciRNA_07836	0.105246	0.157846	0.0590692	0.119742	0.125441	0	0.585242	0	0	0	0	0	0	0.0632001	0	0	0	0.168068	0	0	0	0	0	0	2.059	0	0	0	0	0
Ac_ciRNA_07839	0	0	0	0	0	0	0	0	0	0	0	0	0	0	0	0	0	0	0	0	0	0	0	0	0.0664193	0.298671	0.118332	0.236312	0	0.0418878
Ac_ciRNA_07840	0	0	0	0	0	0	0	0	0	0	0	0	0.813422	1.24293	0	0	0.0817877	0	0	0	0	0	0	0	0	0	0	0	0	0
Ac_ciRNA_07842	0	0	0	0	0	0	0	0	0	0	0	0	0	0	0	0	0	0	0	0	0	0	0	0	0	0	0.138054	0.0644487	0	0
Ac_ciRNA_07845	0	0	0	0	0	0	0	0	0	0	0.116539	0	0	0	0	0	0	0	0	0.0822541	0	0	0.0638346	0.0443901	0	0	0	0	0	0
Ac_ciRNA_07846	0	0	0	0	0	0	0	0	0	0	3.55443	0	0	0	0	0	0	0	3.00488	2.69382	3.88509	4.45829	0	4.4612	0	0	0	0	0	0
Ac_ciRNA_07849	0	0	0	0	0	0	0	0	0	0	0	0	0	0	0	0	0	0	1.11906	1.89184	1.80303	0	2.95767	4.19486	0	0	0	0	0	0
Ac_ciRNA_07853	0	0	0	0	0	0	0	0	0	0	0.0388462	0.0404687	0	0	0	0	0	0	0	0	0	0	0	0	0	0	0	0	0	0
Ac_ciRNA_07857	0	0	0	0	0	0	0	0	0	0	0.194231	0	0	0	0	0	0	0	0.145063	0.246762	0.171717	0.201732	0.148947	0.22195	0	0	0	0	0	0
Ac_ciRNA_07860	0	0	0	0	0	0	0	0	0	0	0.330193	0	0	0	0	0	0	0	0.207233	0.514088	0.236111	0.302599	0	0	0	0	0	0	0	0
Ac_ciRNA_07864	0	0	0	0	0	0	0	1.72467	2.22338	1.74348	3.01058	12.6465	0	0	0	0	0	0	0	0	0	0	0	0	0	0	0	0	0	0
Ac_ciRNA_07866	0	0	0	0	0	0	0	0	0	0.10631	0.135962	0	0	0	0	0	0.0408939	0	0.18651	0.267326	0.150252	0.221906	0.191504	0.22195	0	0	0	0	0	0
Ac_ciRNA_07868	0	0	0	0	0	0	0	0	0	0	0.563271	0	0	0	0	0	0	0	0	0.123381	4.07828	0.74641	0	0.399511	0	0	0	0	0	0
Ac_ciRNA_07869	0	0	0	0	0	0	0	1.43069	3.91739	2.53017	5.34136	19.081	0	0	0	0	0	0	0	0	0	0	0	0	0	0	0	0	0	0
Ac_ciRNA_07870	0	0	0	0	0	0	0	0.78394	4.17149	2.8491	5.86578	0	0	0	0	0	0	0	0	0	0	0	0	0	0	0	0	0	0	1.54985
[truncated: 1,584 more rows]
